# Supplementary material
Source: PubMed Central journal article supplement (PMC1933477)
Supplement: pcbi.0030144.st002.pdf [file pcbi.0030144.st002.pdf]

| <i>Functional units</i>                                                                            | SVM: Second order polynomial kernel<br>vs.<br>RBF kernel |                  |                  | FLDA               |
|----------------------------------------------------------------------------------------------------|----------------------------------------------------------|------------------|------------------|--------------------|
|                                                                                                    | interval                                                 | $AUC_{P^2}$      | $AUC_{RBF}$      | $AUC_{FLDA}$       |
| procephalic ectoderm primordium                                                                    | [0.1; 0.25] <sup>§§</sup><br>[0.05; 0.75]                | 0.0689<br>0.4456 | 0.0644<br>0.5019 | 0.0724<br>0.4726   |
| procephalic ectoderm primordium<br>&&<br>cellular blastoderm                                       | [0.1; 0.5] <sup>§§</sup><br>[0.05; 0.75]                 | 0.3426<br>0.6080 | 0.3399<br>0.5962 | 0.27885<br>0.50597 |
| procephalic ectoderm primordium<br>&&<br>cellular blastoderm<br>&&<br>maternal                     | [0.05; 0.75]                                             | 0.6439           | 0.6157           | 0.52397            |
| somatic muscle primordium                                                                          | [0.05; 0.85]                                             | 0.4635           | 0.5340           | 0.42789            |
| somatic muscle primordium<br>&&<br>trunk mesoderm primordium                                       | [0.15; 0.4] <sup>§§</sup><br>[0.05; 0.85]                | 0.1193<br>0.4508 | 0.1351<br>0.5435 | 0.12897<br>0.53123 |
| somatic muscle primordium<br>&&<br>trunk mesoderm primordium<br>&&<br>trunk mesoderm anlage        | [0.15; 0.4] <sup>§§</sup><br>[0.05; 0.85]                | 0.1461<br>0.5257 | 0.1521<br>0.5282 | 0.1457<br>0.545725 |
| embryonic central brain                                                                            | [0.1; 0.9]                                               | 0.5402           | 0.4894           | 0.55671            |
| embryonic central brain<br>&&<br>protocerebrum primordium                                          | [0.1; 0.9]                                               | 0.6166           | 0.5603           | 0.5378             |
| embryonic central brain<br>&&<br>protocerebrum primordium<br>&&<br>procephalic ectoderm primordium | [0.1; 0.9]<br>[0.1; 0.35] <sup>§§</sup>                  | 0.5981<br>0.1921 | 0.6126<br>0.1409 | 0.62716<br>0.14218 |
| embryonic midgut                                                                                   | [0.05; 0.9]                                              | 0.5284           | 0.5650           | 0.45706            |
| embryonic midgut<br>&&<br>anterior midgut primordium                                               | [0.05; 0.9]<br>[0.05; 0.5] <sup>§§</sup>                 | 0.6529<br>0.2782 | 0.6339<br>0.2982 | 0.49321<br>0.17307 |
| embryonic midgut<br>&&<br>anterior midgut primordium<br>&&<br>anterior endoderm primordium         | [0.05; 0.9]<br>[0.05; 0.5] <sup>§§</sup>                 | 0.6927<br>0.3279 | 0.6526<br>0.3198 | 0.53429<br>0.18929 |
| lateral cord                                                                                       | [0.05; 0.8]                                              | 0.5332           | 0.3801           | 0.46408            |
| lateral cord<br>&&<br>ventral nerve cord primordium                                                | [0.05; 0.8]<br>[0.05; 0.3] <sup>§§</sup>                 | 0.6144<br>0.1644 | 0.5870<br>0.1707 | 0.63909<br>0.14939 |
| lateral cord<br>&&<br>ventral nerve cord primordium<br>&&<br>ventral neuroderm anlage              | [0.05; 0.8]<br>[0.05; 0.3] <sup>§§</sup>                 | 0.6138<br>0.1538 | 0.6389<br>0.1625 | 0.57924<br>0.12837 |

Table 2: Performance measures for SVM and FLDA classifiers applied to functional units.  $P^2$  denotes second order polynomial kernel and §§ symbol indicates an interval containing an  $x$ -coordinate of the operating point.
