# Supplementary material
Source: PubMed Central journal article supplement (PMC1933477)
Supplement: pcbi.0030144.st003.pdf [file pcbi.0030144.st003.pdf]

| <i>Functional units</i> | Parameters<br>of the<br>classifier                  | <i>Se</i> and 1- <i>Sp</i> scores<br>for the test data |              |
|-------------------------|-----------------------------------------------------|--------------------------------------------------------|--------------|
|                         |                                                     | <i>Se</i>                                              | 1- <i>Sp</i> |
| mat2pep                 | <b>P<sup>2</sup></b><br>c=0.55; s=1.4; r=1.2; j=1.1 | 0.8888                                                 | 0.1905       |
| tma2smusclep            | <b>RBF</b><br>c=0.35; g=9.0; j= 3.7                 | 0.875                                                  | 0.1538       |
| aep2egut                | <b>P<sup>2</sup></b><br>c=0.1; s=3.0; r=0.7; j=1.2  | 0.8571                                                 | 0.1176       |
| pep2ebrain              | <b>P<sup>2</sup></b><br>c=1.1; s=2.2; r=1.8; j=0.7  | 0.8571                                                 | 0.1111       |
| vna2lcard               | <b>RBF</b><br>c=0.25; g=0.9; j=0.9                  | 0.875                                                  | 0.2          |

Table 3: Parameters of the best classifier found with the projection method and *Sensitivity* and *1-Specificity* scores obtained when applying the prediction method for the test set data. Here s,r and g are kernel parameters, while c is the parameter that controls a degree of training error tolerated. j denotes the misclassification cost factor. Kernel function used in classification (a) RBF:  $K_{\mathbf{RBF}}(\vec{x}_1; \vec{x}_2) = \exp(-g(\vec{x}_1 - \vec{x}_2)^2)$  and (b) Second order polynomial (**P<sup>2</sup>**)  $K_{\mathbf{P}^2}(\vec{x}_1; \vec{x}_2) = (s \vec{x}_1 \cdot \vec{x}_2 + r)^2$
