# Supplementary material
Source: PubMed Central journal article supplement (PMC1933477)
Supplement: pcbi.0030144.st004.pdf [file pcbi.0030144.st004.pdf]

## *De novo* predictions of localization of gene expression confirmed by published experiments

Table 4: **Functional unit mat2pep**: procephalic ectoderm primordium && cellular blastoderm && maternal

| Gene name   | Prediction Rank | Expression                                                                                                                                                                         | Reference                                                                                              |
|-------------|-----------------|------------------------------------------------------------------------------------------------------------------------------------------------------------------------------------|--------------------------------------------------------------------------------------------------------|
| <i>bnb</i>  | 14              | St.59; blastoderm ubiquitous.<br>St.8; Elevated posterior midgut invagination.<br>St.9; Dorsal epidermis, mesectoderm, supra and subesophageal ganglia, brain<br>St.13; epidermal. | Ng <i>et al.</i> [1], Fig.5&6                                                                          |
| <i>mira</i> | 20              | Maternal.<br>Blastoderm.<br>St.8; procephalic ventral neuroectoderm.<br>St.10; ventral nerve cord, brain, posterior midgut.<br>St.13; brain and CNS.                               | Shen <i>et al.</i> [2], Fig 2.<br>Ikeshima-Kataoka <i>et al.</i> [3], Fig 2.a                          |
| <i>rost</i> | 23              | Maternal.<br>Blastoderm,<br>(Northern + statement, no image of blastoderm)<br>St.12: lateral and dorsal head, mesoderm.                                                            | Paulat <i>et al.</i> [4], Fig.3                                                                        |
| <i>BicD</i> | 34              | Maternal. Ubiquitous.<br>Fades by end of blastoderm.<br>St.13; mesoderm and ventral midline.                                                                                       | Suter <i>et al.</i> [5], Fig.4                                                                         |
| <i>hth</i>  | 35              | Blastoderm.<br>St.6-7; ectoderm NOT procephalic (posterior to cephalic furrow).<br>St.10-11; clypeolabrum, mandibular, labial.<br>St.14; CNS.                                      | Kurant <i>et al.</i> [6], Fig.5<br>Rieckhof <i>et al.</i> [7], Fig.7<br>Nagao <i>et al.</i> [8], Fig.1 |
| <i>spi</i>  | 47              | Maternal.<br>Blastoderm.<br>St.12; enriched in mesoderm (ubiquitous).<br>St.13; enriched in brain and CNS) (ubiquitous).                                                           | Rieckhof <i>et al.</i> [9] Fig.7                                                                       |
| <i>emb</i>  | 57              | Maternal.<br>Ubiquitous.<br>Blastoderm.                                                                                                                                            | Collier <i>et al.</i> [10], Fig.2                                                                      |
| <i>Dl</i>   | 66              | Maternal.<br>Preblastoderm.<br>Blastoderm.<br>Procephalic and ventral neuroectoderm.                                                                                               | Haenlin <i>et al.</i> [11], Fig.5&6<br>Kooh <i>et al.</i> [12]<br>Kopczynski <i>et al.</i> [13]        |
| <i>D</i>    | 71              | NO maternal.<br>Preblastoderm.<br>Blastoderm.<br>Procephalic and ventral neuroectoderm.                                                                                            | Russell <i>et al.</i> [14], Fig.3<br>Nambu <i>et al.</i> [15], Fig.5                                   |
| <i>CycB</i> | 78              | Maternal.                                                                                                                                                                          | Lehner <i>et al.</i> [16], Fig.4                                                                       |

*continued on next page...*

*Table 4 continued from previous page.*

| Gene name    | Prediction Rank | Expression                                                                                                                                                                                     | Reference                                                                  |
|--------------|-----------------|------------------------------------------------------------------------------------------------------------------------------------------------------------------------------------------------|----------------------------------------------------------------------------|
|              |                 | Ubiquitous.<br>Decreasing.<br>St.8-9 Cephalic and ventral neuroectoderm                                                                                                                        |                                                                            |
| <i>CycB3</i> | 103             | Maternal.<br>Ubiquitous.<br>Blastoderm fading.<br>From St.7 cephalic and trunk mesoderm.                                                                                                       | Jacobs <i>et al.</i> [17], Fig.4                                           |
| <i>gmc</i>   | 104             | NO maternal.<br>St.5; Blastoderm anteriorventral patch.<br>St.7; Anterior cephalic furrow and cephalic mesoderm analage<br>St.10; cephalic mesoderm.<br>St.10;glial precursors,<br>St.11; glia | Jones <i>et al.</i> [18], Fig.2<br>Bernardoni <i>et al.</i> [19], Fig.2& 3 |

## References

- [1] Ng SC, Perkins LA, Conboy G, Perrimon N, Fishman MC (1989) A drosophila gene expressed in the embryonic cns shares one conserved domain with the mammalian gap-43. *Development* 105:629–38.
- [2] Shen CP, Jan LY, Jan YN (1997) Miranda is required for the asymmetric localization of prospero during mitosis in drosophila. *Cell* 90:449–58.
- [3] Ikeshima-Kataoka H, Skeath JB, Nabeshima Y, Doe CQ, Matsuzaki F (1997) Miranda directs prospero to a daughter cell during drosophila asymmetric divisions. *Nature* 390:625–9.
- [4] Paululat A, Goubeaud A, Damm C, Knirr S, Burchard S, et al. (1997) The mesodermal expression of rolling stone (rost) is essential for myoblast fusion in drosophila and encodes a potential transmembrane protein. *J Cell Biol* 138:337–48.
- [5] Suter B, Romberg L, Steward R (1989) Bicaudal-d, a drosophila gene involved in developmental asymmetry: localized transcript accumulation in ovaries and sequence similarity to myosin heavy chain tail domains. *Genes Dev* 3:1957–1968.
- [6] Kurant E, Pai CY, Sharf R, Halachmi N, Sun YH, et al. (1998) Dorsotonals/homothorax, the drosophila homologue of meis1, interacts with extradenticle in patterning of the embryonic pns. *Development* 125:1037–48.
- [7] Rieckhof G, Casares F, Ryoo H, Abu-Shaar M, Mann R (1997) Nuclear translocation of extradenticle requires homothorax, which encodes an extradenticle-related homeodomain protein. *Cell* 91:171–183.
- [8] Nagao T, Endo K, Kawauchi H, Walldorf U, Furukubo-Tokunaga K (2000) Patterning defects in the primary axonal scaffolds caused by the mutations of the extradenticle and homothorax genes in the embryonic drosophila brain. *Development Genes and Evolution* 210:289–299.

- [9] Rutledge BJ, Zhang K, Bier E, Jan YN, Perrimon N (1992) The drosophila spitz gene encodes a putative egf-like growth factor involved in dorsal-ventral axis formation and neurogenesis. *Genes Dev* 6:1503–17.
- [10] Collier S, Chan HY, Toda T, McKimmie C, Johnson G, et al. (2000) The drosophila embargoed gene is required for larval progression and encodes the functional homolog of schizosaccharomyces crm1. *Genetics* 155:1799–807.
- [11] Haenlin M, B K, Campos-Ortega J (1990) The pattern of transcription of the neurogenic gene delta of drosophila melanogaster. *Development* 110:905–914.
- [12] Kooh PJ, Fehon RG, Muskavitch MA (1993) Implications of dynamic patterns of delta and notch expression for cellular interactions during drosophila development. *Development* 117:493–507.
- [13] Kopczyński C, Muskavitch M (1989) Complex spatio-temporal accumulation of alternative transcripts from the neurogenic gene delta during drosophila embryogenesis. *Development* 107:623–636.
- [14] Russell SR, Sanchez-Soriano N, Wright CR, Ashburner M (1996) The dichaete gene of drosophila melanogaster encodes a sox-domain protein required for embryonic segmentation. *Development* 122:3669–76.
- [15] Nambu P, Nambu J (1996) The drosophila fish-hook gene encodes a hmg domain protein essential for segmentation and cns development. *Development* 122:3467–75.
- [16] Lehner CF, O’Farrell PH (1990) The roles of drosophila cyclins a and b in mitotic control. *Cell* 61:535–47.
- [17] Jacobs HW, Knoblich JA, Lehner CF (1998) Drosophila cyclin b3 is required for female fertility and is dispensable for mitosis like cyclin b. *Genes Dev* 12:3741–51.
- [18] Jones BW, Fetter RD, Tear G, Goodman CS (1995) glial cells missing: a genetic switch that controls glial versus neuronal fate. *Cell* 82:1013–23.
- [19] Bernardoni R, Vivancos V, Giangrande A (1997) glide/gcm is expressed and required in the scavenger cell lineage. *Dev Biol* 191:118–130.
