# Supplementary material
Source: PubMed Central journal article supplement (PMC1933477)
Supplement: pcbi.0030144.st005.pdf [file pcbi.0030144.st005.pdf]

## *De novo* predictions of localization of gene expression confirmed by published experiments

Table 5: **Functional unit vna2lcord**: ventral neuroderm anlage && ventral nerve cord primordium && lateral cord

| Gene name  | Prediction Rank | Expression                                                       | Reference                                                        |
|------------|-----------------|------------------------------------------------------------------|------------------------------------------------------------------|
| <i>svp</i> | 23              | St.8 Neuroblasts (neuroderm anlage).<br>Extensive NB expression. | Doe <i>et al.</i> [1], Fig.5<br>Broadus <i>et al.</i> [2], Fig.2 |

## References

- [1] Doe CQ (1992) Molecular markers for identified neuroblasts and ganglion mother cells in the drosophila central nervous system. *Development* 116:855–63.
- [2] Broadus J, Doe C (1995) Evolution of neuroblast identity: seven-up and prospero expression reveal homologous and divergent neuroblast fates in drosophila and schistocerca. *Development* 121:3989–96.
