# Supplementary material
Source: PubMed Central journal article supplement (PMC1933477)
Supplement: pcbi.0030144.st006.pdf [file pcbi.0030144.st006.pdf]

## *De novo* predictions of localization of gene expression confirmed by published experiments

Table 6: **Functional unit pep2ebrain:** embryonic central brain && protocerebrum primordium && procephalic ectoderm primordium

| Gene name   | Prediction Rank | Expression                                                                                                                                                         | Reference                                                                                              |
|-------------|-----------------|--------------------------------------------------------------------------------------------------------------------------------------------------------------------|--------------------------------------------------------------------------------------------------------|
| <i>gro</i>  | 1               | Maternal ubiquitous<br>St.8; broad distribution including procephalic ectoderm<br>St.11; brain and trunk CNS                                                       | Maier <i>et al.</i> [1], Fig.3<br>Hartley <i>et al.</i> [2], Fig.8                                     |
| <i>Nrt</i>  | 13              | St. 6; Dorsal and ventral ectoderm.<br>St 7; ventral furrow (mesoderm), cephalic furrow.<br>St. 9; Brain and trunk CNS.                                            | Hortsch <i>et al.</i> [3], Fig.1,2&3                                                                   |
| <i>vgl</i>  | 21              | St.10; Midline and tracheal placodes<br>St.10-11; procephalon, clypeolabrum, labium (minor component of expression)                                                | Anderson <i>et al.</i> [4],Fig.2                                                                       |
| <i>hth</i>  | 26              | Blastoderm.<br>St.6-7; ectodermNOT procephalic (posterior to cephalic furrow).<br>St.10-11; clypeolabrum, mandibular, labial.<br>St.14; CNS                        | Kurant <i>et al.</i> [5], Fig.5<br>Rieckhof <i>et al.</i> [6], Fig.7<br>Nagao <i>et al.</i> [7], Fig.1 |
| <i>18w</i>  | 27              | Blastoderm, procephalic region.<br>St.5; cepahalic furrow<br>St.8; procephalic ectoderm<br>St.12; clypeolabrum                                                     | Eldon <i>et al.</i> [8], Fig.1<br>Chiang <i>et al.</i> [9]                                             |
| <i>mts</i>  | 28              | procephalic neuroblasts<br>supraesophageal ganglion                                                                                                                | Mayer-Jaekel <i>et al.</i> [10], Fig.7&8                                                               |
| <i>mnb</i>  | 33              | Late (St.16) condensed trunk and brain CNS, supraesophageal ganglia                                                                                                | Tejedor <i>et al.</i> [11]. Fig.9                                                                      |
| <i>Fur1</i> | 76              | Ventral nerve cord and brain.<br>St.14; antennomaxillary complex, subesophageal ganglion, clipeolabrum.                                                            | Hayflick <i>et al.</i> [12], Fig.9<br>Roebrook <i>et al.</i> [13], Fig.9                               |
| <i>comm</i> | 78              | Blastoderm pair rule pattern including procephalic ectoderm.<br>St.9-10; procephalic ectoderm and ventral nerve cord primordia                                     | Tear <i>et al.</i> [14], Fig.4<br>BDGP                                                                 |
| <i>N</i>    | 93              | Blastoderm, neurogenic region.<br>Procephalic epidermis.<br>Supraesophageal ganglia.<br>Optic lobe primordia.                                                      | Hartley <i>et al.</i> [15], Fig.2                                                                      |
| <i>slp1</i> | 97              | St.5; Blastoderm, Procephalic region.<br>St.6; Procephalon, head and cephalic furrow.<br>St.10; procephalon, clypeolabrum, gnathal<br>Ventral nerve cord and brain | Grossniklaus <i>et al.</i> [16], Fig.4                                                                 |

*continued on next page...*

| <i>Table 6 continued from previous page.</i> |                 |                                                                                                                                                                                          |                                                                          |
|----------------------------------------------|-----------------|------------------------------------------------------------------------------------------------------------------------------------------------------------------------------------------|--------------------------------------------------------------------------|
| Gene name                                    | Prediction Rank | Expression                                                                                                                                                                               | Reference                                                                |
| <i>vnd</i>                                   | 98              | Blastoderm onwards:<br>ventral and procephalic neuroectoderm.<br>Brain and trunk neuroblasts.                                                                                            | Jimenez <i>et al.</i> [17], Fig.3                                        |
| <i>Mvl</i>                                   | 101             | Procephalic lobe, brain                                                                                                                                                                  | Rodrigues <i>et al.</i> [18], Fig.7                                      |
| <i>disco</i>                                 | 104             | labrum, cephalic furrow.<br>procephalic.<br>gnathal segment.<br>clypeolabrum.<br>optic and antennal brain lobes.                                                                         | Lee <i>et al.</i> [19], Fig.1&2                                          |
| <i>tgo</i>                                   | 112             | Brain and ventral nerve cord.<br>Supraesophagheal ganglia.<br>Maxillary, labial,<br>mandibular and antennal segments.<br>antennal complex.                                               | Sonnenfeld <i>et al.</i> [20], Fig.3<br>Emmons <i>et al.</i> [21], Fig.5 |
| <i>Nrk</i>                                   | 128             | St.11; cephalic and trunk neuroectoderm.<br>Brain and ventral nerve cord.                                                                                                                | Oishi <i>et al.</i> [22], Fig.4                                          |
| <i>bnb</i>                                   | 137             | St.5-9; blastoderm ubiquitous.<br>St.8; Elevated posterior midgut invagination<br>St.9; Dorsal epidermis, mesectoderm.<br>supra and subesophageal ganglia.<br>Brain.<br>St13; epidermal. | Ng <i>et al.</i> [23], Fig.5&6                                           |
| <i>rst</i>                                   | 144             | Ventral midline.<br>Mandibular, maxillary and labial segments.<br>Clypeolabrum                                                                                                           | Ramos <i>et al.</i> [24], Fig.4                                          |

## References

- [1] Maier D, Marte BM, Schafer W, Yu Y, Preiss A (1993) *Drosophila* evolution challenges postulated redundancy in the e(spl) gene complex. *Proc Natl Acad Sci USA* 90:5464–8.
- [2] Hartley D, Preiss A, Artavanis-Tsakonas S (1988) A deduced gene product from the *drosophila* neurogenic locus, enhancer of split, shows homology to mammalian g-protein beta subunit. *Cell* 55:785–95.
- [3] Hortsch M, Patel N, Bieber A, Traquina Z, Goodman C (1990) *Drosophila* neurotactin, a surface glycoprotein with homology to serine esterases, is dynamically expressed during embryogenesis. *Development* 110:1327–40.
- [4] Anderson M, Perkins G, Chittick P, Shrigley R, Johnson W (1995) drifter, a *drosophila* pou-domain transcription factor, is required for correct differentiation and migration of tracheal cells and midline glia. *Genes Dev* 9:123–137.
- [5] Kurant E, Pai CY, Sharf R, Halachmi N, Sun YH, et al. (1998) Dorsotonals/homothorax, the *drosophila* homologue of meis1, interacts with extradenticle in patterning of the embryonic pns. *Development* 125:1037–48.

- [6] Rieckhof G, Casares F, Ryoo H, Abu-Shaar M, Mann R (1997) Nuclear translocation of extradenticle requires homothorax, which encodes an extradenticle-related homeodomain protein. *Cell* 91:171–183.
- [7] Nagao T, Endo K, Kawauchi H, Walldorf U, Furukubo-Tokunaga K (2000) Patterning defects in the primary axonal scaffolds caused by the mutations of the extradenticle and homothorax genes in the embryonic drosophila brain. *Development Genes and Evolution* 210:289–299.
- [8] Eldon E, Kooyer S, D'Evelyn D, Duman M, Lawinger P, et al. (1994) The drosophila 18 wheeler is required for morphogenesis and has striking similarities to toll. *Development* 120:885–99.
- [9] Chiang C, Beachy P (1994) Expression of a novel toll-like gene spans the parasegment boundary and contributes to hedgehog function in the adult eye of drosophila. *Mech Dev* 47:225–239.
- [10] Mayer-Jaekel RE, Baumgartner S, Bilbe G, Ohkura H, Glover DM, et al. (1992) Molecular cloning and developmental expression of the catalytic and 65-kda regulatory subunits of protein phosphatase 2a in drosophila. *Mol Biol Cell* 3:287–98.
- [11] Tejedor F, Zhu XR, Kaltenbach E, Ackermann A, Baumann A, et al. (1995) minibrain: a new protein kinase family involved in postembryonic neurogenesis in drosophila. *Neuron* 14:287–301.
- [12] Hayflick J, Wolfgang W, Forte M, Thomas G (1992) A unique kex2-like endoprotease from drosophila melanogaster is expressed in the central nervous system during early embryogenesis. *J Neurosci* 12:705–717.
- [13] Roebroek AJ, Creemers JW, Pauli IG, Bogaert T, Van de Ven WJ (1993) Generation of structural and functional diversity in furin-like proteins in drosophila melanogaster by alternative splicing of the dfur1 gene. *EMBO J* 12:1853–70.
- [14] Tear G, Harris R, Sutaria S, Kilomanski K, Goodman C, et al. (1996) commissureless controls growth cone guidance across the cns midline in drosophila and encodes a novel membrane protein. *Neuron* 12:501–514.
- [15] Hartley DA, Xu TA, Artavanis-Tsakonas S (1987) The embryonic expression of the notch locus of drosophila melanogaster and the implications of point mutations in the extracellular egf-like domain of the predicted protein. *EMBO J* 6:3407–17.
- [16] Grossniklaus U, Pearson RK, Gehring WJ (1992) The drosophila sloppy paired locus encodes two proteins involved in segmentation that show homology to mammalian transcription factors. *Genes Dev* 6:1030–51.
- [17] Jimenez F, Martin-Morris L, Velasco L, Chu H, Sierra J, et al. (1995) vnd, a gene required for early neurogenesis of drosophila, encodes a homeodomain protein. *EMBO J* 14:3487–3495.
- [18] Rodrigues V, Cheah PY, Ray K, Chia W (1995) malvolio, the drosophila homologue of mouse nramp-1 (bcg), is expressed in macrophages and in the nervous system and is required for normal taste behaviour. *EMBO J* 14:3007–20.
- [19] Lee K, Freeman M, Steller H (1991) Expression of the disconnected gene during development of drosophila melanogaster. *EMBO J* 10:817–826.

- [20] Sonnenfeld M, Ward M, Nystrom G, Mosher J, Stahl S, et al. (1997) The drosophila tango gene encodes a bhlh-pas protein that is orthologous to mammalian arnt and controls cns midline and tracheal development. *Development* 124:4571–4582.
- [21] Emmons RB, Duncan D, Estes PA, Kiefel P, Mosher JT, et al. (1999) The spineless-aristapedia and tango bhlh-pas proteins interact to control antennal and tarsal development in drosophila. *Development* 126:3937–45.
- [22] Oishi I, Sugiyama S, Liu ZJ, Yamamura H, Nishida Y, et al. (1997) A novel drosophila receptor tyrosine kinase expressed specifically in the nervous system. unique structural features and implication in developmental signaling. *J Biol Chem* 272:11916–23.
- [23] Ng SC, Perkins LA, Conboy G, Perrimon N, Fishman MC (1989) A drosophila gene expressed in the embryonic cns shares one conserved domain with the mammalian gap-43. *Development* 105:629–38.
- [24] Ramos RG, Igloi GL, Lichte B, Baumann U, Maier D, et al. (1993) The irregular chiasm c-roughest locus of drosophila, which affects axonal projections and programmed cell death, encodes a novel immunoglobulin-like protein. *Genes Dev* 7:2533–47.
