# Supplementary material
Source: PubMed Central journal article supplement (PMC1933477)
Supplement: pcbi.0030144.st007.pdf [file pcbi.0030144.st007.pdf]

## ***De novo* predictions of localization of gene expression confirmed by published experiments**

Table 7: **Functional unit aep2egut:** embryonic midgut && anterior midgut primordium && anterior endoderm primordium

| Gene name     | Prediction Rank | Expression                                                                                                     | Reference                           |
|---------------|-----------------|----------------------------------------------------------------------------------------------------------------|-------------------------------------|
| <i>ab</i>     | 4               | Anterior and posterior midgut<br>Proventriculus<br>foregut<br>Stomatogastric nervous system<br>ventral midline | Hu <i>et al.</i> [1], Fig.4         |
| <i>nop5</i>   | 10              | Midgut primordium<br>Midgut                                                                                    | Vorbruggen <i>et al.</i> [2], Fig.2 |
| <i>HLHm7</i>  | 26              | Posterior midgut primordium<br>stomatogastric nervous system                                                   | Knust <i>et al.</i> [3], Fig.5&7    |
| <i>CG6712</i> | 101             | Embryonic gut                                                                                                  | Lyko <i>et al.</i> [4], Fig.2       |

## **References**

- [1] Hu S, Fambrough D, Atashi JR, Goodman CS, Crews ST (1995) The drosophila abrupt gene encodes a btb-zinc finger regulatory protein that controls the specificity of neuromuscular connections. *Genes Dev* 9:2936–48.
- [2] Vorbruggen G, Onel S, Jackle H (2000) Restricted expression and subnuclear localization of the drosophila gene dnop5, a member of the nop/sik family of the conserved rna processing factors. *Mech Dev* 90:305–8.
- [3] Knust E, Tietze K, Campos-Ortega J (1987) Molecular analysis of the neurogenic locus enhancer of split of drosophila melanogaster. *EMBO J* 6:4113–412.
- [4] Lyko F, Whittaker AJ, Orr-Weaver TL, Jaenisch R (2000) The putative drosophila methyltransferase gene ddnmt2 is contained in a transposon-like element and is expressed specifically in ovaries. *Mech Dev* 95:215–7.
