# Supplementary material
Source: PubMed Central journal article supplement (PMC1933477)
Supplement: pcbi.0030144.st008.pdf [file pcbi.0030144.st008.pdf]

## ***De novo* prediction of localization of expression for the 30% fraction of genes characterized with high prediction scores**

The *de novo* predictions of localization of expression for the 30% fraction of genes characterized with high prediction scores obtained for each functional unit are verified with Gene Ontology terms from the Biological Process category. As a rule a gene is annotated with many GO:Biological Process terms. The *de novo* prediction of localization of expression for a gene is confirmed with GO term (the respective gene is marked with "yes" sign in the tables below), if and only if, the gene is annotated with at least one GO:Biological process term relevant to the developmental process the anatomical structures comprising the functional unit under study are known to be involved in. If the GO:Biological process annotation does not contain evidence in support of prediction of localization of expression a gene is assigned with "Not Annotated" ("NA") symbol in the tables. The GO:Biological Process annotation for *Drosophila* genes can be found in the data support files for this manuscript or in FlyBase database [1] at [www.flybase.net](http://www.flybase.net).

Table 8: **Results of prediction of localization of gene expression for functional unit mat2pep: procephalic ectoderm primordium && cellular blastoderm && maternal**

| Prediction Rank           | Supported with GO:Biological Process annotation | Gene ID     | Gene name     | Confidence Score (distance from the hyperplane) |
|---------------------------|-------------------------------------------------|-------------|---------------|-------------------------------------------------|
| 1                         | yes                                             | FBgn0011761 | <i>dhd</i>    | 53.9952                                         |
| 2                         | NA                                              | FBgn0015565 | <i>yin</i>    | 52.5244                                         |
| 3                         | yes                                             | FBgn0003015 | <i>osk</i>    | 51.6832                                         |
| 4                         | yes                                             | FBgn0000615 | <i>exu</i>    | 44.1211                                         |
| 5                         | yes                                             | FBgn0004649 | <i>yl</i>     | 32.2157                                         |
| 6                         | yes                                             | FBgn0013272 | <i>Gp150</i>  | 30.9283                                         |
| 7                         | NA                                              | FBgn0010288 | <i>Uch</i>    | 30.2230                                         |
| 8                         | yes                                             | FBgn0017561 | <i>Ork1</i>   | 28.2992                                         |
| 9                         | yes                                             | FBgn0002962 | <i>nos</i>    | 27.6248                                         |
| 10                        | yes                                             | FBgn0026320 | <i>Tom</i>    | 26.5294                                         |
| 11                        | NA                                              | FBgn0004873 | <i>hts</i>    | 23.6667                                         |
| 12                        | NA                                              | FBgn0015776 | <i>nrv1</i>   | 22.4076                                         |
| 13                        | yes                                             | FBgn0000166 | <i>bcd</i>    | 22.1905                                         |
| 14                        | yes                                             | FBgn0001090 | <i>bnb</i>    | 21.7687                                         |
| 15                        | yes                                             | FBgn0000216 | <i>Brd</i>    | 21.7446                                         |
| 16                        | yes                                             | FBgn0004364 | <i>18w</i>    | 20.1106                                         |
| 17                        | NA                                              | FBgn0000182 | <i>BicC</i>   | 19.1090                                         |
| 18                        | NA                                              | FBgn0005671 | <i>Vha55</i>  | 18.9957                                         |
| 19                        | yes                                             | FBgn0003970 | <i>vas</i>    | 18.4916                                         |
| 20                        | yes                                             | FBgn0021776 | <i>mira</i>   | 18.1972                                         |
| 21                        | yes                                             | FBgn0023094 | <i>cyc</i>    | 16.2562                                         |
| 22                        | yes                                             | FBgn0000180 | <i>bib</i>    | 16.0548                                         |
| 23                        | NA                                              | FBgn0011705 | <i>rost</i>   | 15.8194                                         |
| 24                        | NA                                              | FBgn0028519 | <i>CG4500</i> | 15.4161                                         |
| continued on next page... |                                                 |             |               |                                                 |

| Table 8 continued from previous page. |                                                 |             |                        |                                                 |
|---------------------------------------|-------------------------------------------------|-------------|------------------------|-------------------------------------------------|
| Prediction Rank                       | Supported with GO:Biological Process annotation | Gene ID     | Gene name              | Confidence Score (distance from the hyperplane) |
| 25                                    | NA                                              | FBgn0005771 | <i>noc</i>             | 15.3789                                         |
| 26                                    | yes                                             | FBgn0004236 | $\alpha$ <i>Tub67C</i> | 15.3351                                         |
| 27                                    | yes                                             | FBgn0002633 | <i>HLHm7</i>           | 15.2871                                         |
| 28                                    | NA                                              | FBgn0000392 | <i>cup</i>             | 15.2272                                         |
| 29                                    | NA                                              | FBgn0029174 | <i>FKBP59</i>          | 14.8504                                         |
| 30                                    | NA                                              | FBgn0003187 | <i>qua</i>             | 14.6951                                         |
| 31                                    | yes                                             | FBgn0010452 | <i>trn</i>             | 14.2813                                         |
| 32                                    | NA                                              | FBgn0012037 | <i>Ance</i>            | 14.2331                                         |
| 33                                    | yes                                             | FBgn0005695 | <i>gcl</i>             | 14.0786                                         |
| 34                                    | NA                                              | FBgn0000183 | <i>BicD</i>            | 13.7730                                         |
| 35                                    | yes                                             | FBgn0001235 | <i>hth</i>             | 13.6069                                         |
| 36                                    | NA                                              | FBgn0000562 | <i>egl</i>             | 13.5788                                         |
| 37                                    | NA                                              | FBgn0000097 | <i>aop</i>             | 13.2934                                         |
| 38                                    | NA                                              | FBgn0004914 | <i>Hnf4</i>            | 13.2717                                         |
| 39                                    | yes                                             | FBgn0000251 | <i>cad</i>             | 13.1426                                         |
| 40                                    | NA                                              | FBgn0003204 | <i>ras</i>             | 13.1191                                         |
| 41                                    | yes                                             | FBgn0000575 | <i>emc</i>             | 12.9465                                         |
| 42                                    | NA                                              | FBgn0002673 | <i>twe</i>             | 12.8778                                         |
| 43                                    | NA                                              | FBgn0019686 | <i>lok</i>             | 12.7563                                         |
| 44                                    | NA                                              | FBgn0024846 | <i>p38b</i>            | 12.5961                                         |
| 45                                    | yes                                             | FBgn0002629 | <i>m4</i>              | 12.4736                                         |
| 46                                    | yes                                             | FBgn0000577 | <i>en</i>              | 11.5534                                         |
| 47                                    | NA                                              | FBgn0005672 | <i>spi</i>             | 11.5020                                         |
| 48                                    | NA                                              | FBgn0003023 | <i>otu</i>             | 11.4709                                         |
| 49                                    | yes                                             | FBgn0014163 | <i>fax</i>             | 11.3598                                         |
| 50                                    | yes                                             | FBgn0002631 | <i>HLHm5</i>           | 11.2983                                         |
| 51                                    | NA                                              | FBgn0015239 | <i>Hr78</i>            | 10.9673                                         |
| 52                                    | NA                                              | FBgn0002528 | <i>LanB2</i>           | 10.6957                                         |
| 53                                    | yes                                             | FBgn0001254 | <i>ImpE2</i>           | 10.5246                                         |
| 54                                    | yes                                             | FBgn0002561 | <i>l(1)sc</i>          | 10.5130                                         |
| 55                                    | yes                                             | FBgn0003733 | <i>tor</i>             | 10.2383                                         |
| 56                                    | NA                                              | FBgn0021765 | <i>scu</i>             | 10.1786                                         |
| 57                                    | NA                                              | FBgn0020497 | <i>emb</i>             | 9.7753                                          |
| 58                                    | NA                                              | FBgn0004872 | <i>piwi</i>            | 9.5132                                          |
| 59                                    | yes                                             | FBgn0003117 | <i>pnr</i>             | 9.4732                                          |
| 60                                    | NA                                              | FBgn0010316 | <i>dap</i>             | 9.4639                                          |
| 61                                    | yes                                             | FBgn0014133 | <i>bif</i>             | 9.4065                                          |
| 62                                    | NA                                              | FBgn0024234 | <i>gbb</i>             | 9.3837                                          |
| 63                                    | yes                                             | FBgn0001987 | <i>Gli</i>             | 9.3539                                          |
| 64                                    | NA                                              | FBgn0002069 | <i>Aats-asp</i>        | 9.3367                                          |
| 65                                    | yes                                             | FBgn0011592 | <i>fra</i>             | 9.2284                                          |
| 66                                    | yes                                             | FBgn0000463 | <i>Dl</i>              | 8.8257                                          |
| 67                                    | NA                                              | FBgn0032693 | <i>Cyp310a1</i>        | 8.7707                                          |
| 68                                    | yes                                             | FBgn0000011 | <i>ab</i>              | 8.7675                                          |
| 69                                    | NA                                              | FBgn0004101 | <i>bs</i>              | 8.6142                                          |
| 70                                    | yes                                             | FBgn0010105 | <i>comm</i>            | 8.5711                                          |
| continued on next page...             |                                                 |             |                        |                                                 |

| Table 8 continued from previous page. |                                                 |             |                             |                                                 |
|---------------------------------------|-------------------------------------------------|-------------|-----------------------------|-------------------------------------------------|
| Prediction Rank                       | Supported with GO:Biological Process annotation | Gene ID     | Gene name                   | Confidence Score (distance from the hyperplane) |
| 71                                    | yes                                             | FBgn0000411 | <i>D</i>                    | 8.5129                                          |
| 72                                    | yes                                             | FBgn0000492 | <i>Dr</i>                   | 8.4884                                          |
| 73                                    | yes                                             | FBgn0004009 | <i>wg</i>                   | 8.4225                                          |
| 74                                    | NA                                              | FBgn0004362 | <i>HmgD</i>                 | 8.3760                                          |
| 75                                    | NA                                              | FBgn0002948 | <i>nod</i>                  | 8.2316                                          |
| 76                                    | NA                                              | FBgn0003507 | <i>srp</i>                  | 8.1902                                          |
| 77                                    | NA                                              | FBgn0011823 | <i>Pen</i>                  | 7.9986                                          |
| 78                                    | NA                                              | FBgn0000405 | <i>CycB</i>                 | 7.9496                                          |
| 79                                    | yes                                             | FBgn0000591 | <i>E(spl)</i>               | 7.8492                                          |
| 80                                    | NA                                              | FBgn0003483 | <i>spn-E</i>                | 7.6450                                          |
| 81                                    | NA                                              | FBgn0003884 | $\alpha$ <i>Tub84B</i>      | 7.5595                                          |
| 82                                    | NA                                              | FBgn0001308 | <i>Khc</i>                  | 7.3953                                          |
| 83                                    | NA                                              | FBgn0001215 | <i>Hrb98DE</i>              | 7.3923                                          |
| 84                                    | yes                                             | FBgn0002526 | <i>LanA</i>                 | 7.2772                                          |
| 85                                    | yes                                             | FBgn0002732 | <i>m<math>\alpha</math></i> | 7.2556                                          |
| 86                                    | yes                                             | FBgn0001325 | <i>Kr</i>                   | 7.2540                                          |
| 87                                    | NA                                              | FBgn0020633 | <i>Mcm7</i>                 | 7.1390                                          |
| 88                                    | NA                                              | FBgn0011604 | <i>Iswi</i>                 | 7.0895                                          |
| 89                                    | yes                                             | FBgn0003495 | <i>spz</i>                  | 7.0775                                          |
| 90                                    | yes                                             | FBgn0001075 | <i>ft</i>                   | 6.9668                                          |
| 91                                    | NA                                              | FBgn0015218 | <i>eIF-4E</i>               | 6.9414                                          |
| 92                                    | NA                                              | FBgn0001257 | <i>ImpL2</i>                | 6.8665                                          |
| 93                                    | NA                                              | FBgn0000150 | <i>awd</i>                  | 6.8446                                          |
| 94                                    | yes                                             | FBgn0004170 | <i>sc</i>                   | 6.7448                                          |
| 95                                    | yes                                             | FBgn0003430 | <i>slp1</i>                 | 6.4661                                          |
| 96                                    | NA                                              | FBgn0024923 | <i>TER94</i>                | 6.4253                                          |
| 97                                    | yes                                             | FBgn0015380 | <i>drl</i>                  | 6.4185                                          |
| 98                                    | NA                                              | FBgn0020545 | <i>kraken</i>               | 6.4003                                          |
| 99                                    | yes                                             | FBgn0005634 | <i>zip</i>                  | 6.3568                                          |
| 100                                   | NA                                              | FBgn0015765 | <i>Mpk2</i>                 | 6.3489                                          |
| 101                                   | NA                                              | FBgn0020369 | <i>Pros45</i>               | 6.3325                                          |
| 102                                   | NA                                              | FBgn0003942 | <i>RpS27A</i>               | 6.3138                                          |
| 103                                   | NA                                              | FBgn0015625 | <i>CycB3</i>                | 6.3066                                          |
| 104                                   | yes                                             | FBgn0014179 | <i>gmc</i>                  | 6.2684                                          |
| 105                                   | yes                                             | FBgn0015805 | <i>Rpd3</i>                 | 6.1754                                          |
| 106                                   | NA                                              | FBgn0002524 | <i>lace</i>                 | 6.0995                                          |
| 107                                   | NA                                              | FBgn0003887 | $\beta$ <i>Tub56D</i>       | 6.0608                                          |
| 108                                   | NA                                              | FBgn0004237 | <i>Hrb87F</i>               | 6.0451                                          |
| 109                                   | yes                                             | FBgn0003525 | <i>stg</i>                  | 5.9833                                          |
| 110                                   | NA                                              | FBgn0001941 | <i>ifc</i>                  | 5.9770                                          |
| 111                                   | NA                                              | FBgn0003471 | $\beta$ - <i>Spec</i>       | 5.9538                                          |
| 112                                   | NA                                              | FBgn0000927 | <i>fs(1)Ya</i>              | 5.9130                                          |
| 113                                   | NA                                              | FBgn0000042 | <i>Act5C</i>                | 5.8574                                          |
| 114                                   | NA                                              | FBgn0002283 | <i>l(3)73Ah84D</i>          | 5.7829                                          |
| 115                                   | NA                                              | FBgn0003885 | $\alpha$ <i>Tub84D</i>      | 5.7761                                          |
| 116                                   | yes                                             | FBgn0001148 | <i>gsb</i>                  | 5.7600                                          |
| continued on next page...             |                                                 |             |                             |                                                 |

*Table 8 continued from previous page.*

| Prediction Rank | Supported with GO:Biological Process annotation | Gene ID     | Gene name                       | Confidence Score (distance from the hyperplane) |
|-----------------|-------------------------------------------------|-------------|---------------------------------|-------------------------------------------------|
| 117             | yes                                             | FBgn0010349 | <i>Dhc64C</i>                   | 5.7546                                          |
| 118             | yes                                             | FBgn0011598 | <i>grp</i>                      | 5.7446                                          |
| 119             | NA                                              | FBgn0004381 | <i>Klp68D</i>                   | 5.7117                                          |
| 120             | yes                                             | FBgn0001123 | <i>G-<math>\alpha</math>60A</i> | 5.6853                                          |
| 121             | yes                                             | FBgn0011817 | <i>nmo</i>                      | 5.6682                                          |
| 122             | NA                                              | FBgn0020910 | <i>RpL3</i>                     | 5.6398                                          |
| 123             | yes                                             | FBgn0003498 | <i>sqd</i>                      | 5.5945                                          |
| 124             | yes                                             | FBgn0011260 | <i>Sema-2a</i>                  | 5.5443                                          |
| 125             | NA                                              | FBgn0015295 | <i>shark</i>                    | 5.5302                                          |
| 126             | NA                                              | FBgn0020622 | <i>Pi3K21B</i>                  | 5.5179                                          |
| 127             | NA                                              | FBgn0010438 | <i>mtSSB</i>                    | 5.4838                                          |
| 128             | NA                                              | FBgn0010410 | <i>RpL27A</i>                   | 5.4172                                          |
| 129             | NA                                              | FBgn0014857 | <i>His3.3A</i>                  | 5.3835                                          |
| 130             | yes                                             | FBgn0000308 | <i>chic</i>                     | 5.3499                                          |
| 131             | NA                                              | FBgn0004867 | <i>sop</i>                      | 5.3374                                          |
| 132             | NA                                              | FBgn0000158 | <i>bam</i>                      | 5.3253                                          |
| 133             | yes                                             | FBgn0004893 | <i>bowl</i>                     | 5.2975                                          |
| 134             | NA                                              | FBgn0003124 | <i>polo</i>                     | 5.2972                                          |
| 135             | NA                                              | FBgn0024939 | <i>RpL8</i>                     | 5.2501                                          |
| 136             | NA                                              | FBgn0011361 | <i>mtacp1</i>                   | 5.2215                                          |
| 137             | yes                                             | FBgn0010382 | <i>CycE</i>                     | 5.1200                                          |

## References

- [1] Drysdale RA, Crosby MA (2005) FlyBase: genes and gene models. *Nucleic Acids Res* 33:D390–5.
