# Supplementary material
Source: PubMed Central journal article supplement (PMC1933477)
Supplement: pcbi.0030144.st009.pdf [file pcbi.0030144.st009.pdf]

## ***De novo* prediction of localization of expression for the 30% fraction of genes characterized with high prediction scores**

The *de novo* predictions of localization of expression for the 30% fraction of genes characterized with high prediction scores obtained for each functional unit are verified with Gene Ontology terms from the Biological Process category. As a rule a gene is annotated with many GO:Biological Process terms. The *de novo* prediction of localization of expression for a gene is confirmed with GO term (the respective gene is marked with "yes" sign in the tables below), if and only if, the gene is annotated with at least one GO:Biological process term relevant to the developmental process the anatomical structures comprising the functional unit under study are known to be involved in. If the GO:Biological process annotation does not contain evidence in support of prediction of localization of expression a gene is assigned with "Not Annotated" ("NA") symbol in the tables. The GO:Biological Process annotation for *Drosophila* genes can be found in the data support files for this manuscript or in FlyBase database [1] at [www.flybase.net](http://www.flybase.net).

Table 9: **Results of prediction of localization of gene expression for functional unit tma2smusclep: somatic muscle primordium && trunk mesoderm primordium && trunk mesoderm anlage**

| Prediction Rank | Supported with GO:Biological Process annotation | Gene ID     | Gene name       | Confidence Score (distance from the hyperplane) |
|-----------------|-------------------------------------------------|-------------|-----------------|-------------------------------------------------|
| 1               | NA                                              | FBgn0024939 | <i>RpL8</i>     | 0.9409                                          |
| 2               | NA                                              | FBgn0000356 | <i>Cp16</i>     | 0.8065                                          |
| 3               | yes                                             | FBgn0001085 | <i>fz</i>       | 0.6730                                          |
| 4               | NA                                              | FBgn0004428 | <i>LysE</i>     | 0.6160                                          |
| 5               | NA                                              | FBgn0003301 | <i>rut</i>      | 0.6044                                          |
| 6               | NA                                              | FBgn0004597 | <i>CycC</i>     | 0.5519                                          |
| 7               | NA                                              | FBgn0003425 | <i>sli</i>      | 0.5250                                          |
| 8               | NA                                              | FBgn0020414 | <i>Idgf3</i>    | 0.5183                                          |
| 9               | NA                                              | FBgn0005776 | <i>Pp2A-29B</i> | 0.4790                                          |
| 10              | yes                                             | FBgn0004198 | <i>ct</i>       | 0.4676                                          |
| 11              | NA                                              | FBgn0004050 | <i>z</i>        | 0.4566                                          |
| 12              | NA                                              | FBgn0003520 | <i>stau</i>     | 0.4273                                          |
| 13              | NA                                              | FBgn0004509 | <i>Fur1</i>     | 0.3838                                          |
| 14              | yes                                             | FBgn0013343 | <i>Syx1A</i>    | 0.3608                                          |
| 15              | NA                                              | FBgn0016696 | <i>Pitslre</i>  | 0.3468                                          |
| 16              | yes                                             | FBgn0003986 | <i>vnd</i>      | 0.3324                                          |
| 17              | NA                                              | FBgn0000221 | <i>brn</i>      | 0.3080                                          |
| 18              | NA                                              | FBgn0019940 | <i>Rh6</i>      | 0.2742                                          |
| 19              | NA                                              | FBgn0023495 | <i>Lip3</i>     | 0.2714                                          |
| 20              | NA                                              | FBgn0001258 | <i>ImpL3</i>    | 0.2707                                          |
| 21              | NA                                              | FBgn0002565 | <i>Lsp2</i>     | 0.2696                                          |
| 22              | NA                                              | FBgn0027945 | <i>ppl</i>      | 0.2658                                          |
| 23              | yes                                             | FBgn0014388 | <i>sty</i>      | 0.2647                                          |
| 24              | NA                                              | FBgn0010110 | <i>east</i>     | 0.2646                                          |

*continued on next page...*

Table 9 continued from previous page.

| Prediction Rank | Supported with GO:Biological Process annotation | Gene ID     | Gene name      | Confidence Score (distance from the hyperplane) |
|-----------------|-------------------------------------------------|-------------|----------------|-------------------------------------------------|
| 25              | NA                                              | FBgn0001565 | <i>Hlc</i>     | 0.2469                                          |
| 26              | NA                                              | FBgn0020261 | <i>pcm</i>     | 0.2422                                          |
| 27              | NA                                              | FBgn0025739 | <i>pon</i>     | 0.2327                                          |
| 28              | NA                                              | FBgn0010435 | <i>emp</i>     | 0.2314                                          |
| 29              | NA                                              | FBgn0000409 | <i>Cyt-c-p</i> | 0.2244                                          |
| 30              | NA                                              | FBgn0011828 | <i>Pxn</i>     | 0.2196                                          |
| 31              | NA                                              | FBgn0001079 | <i>fu</i>      | 0.2188                                          |
| 32              | NA                                              | FBgn0010583 | <i>dock</i>    | 0.2088                                          |
| 33              | NA                                              | FBgn0002948 | <i>nod</i>     | 0.2030                                          |
| 34              | NA                                              | FBgn0003996 | <i>w</i>       | 0.1966                                          |
| 35              | NA                                              | FBgn0015754 | <i>Lis-1</i>   | 0.1914                                          |
| 36              | NA                                              | FBgn0003372 | <i>Sgs1</i>    | 0.1896                                          |
| 37              | NA                                              | FBgn0003979 | <i>Vm26Aa</i>  | 0.1884                                          |
| 38              | NA                                              | FBgn0011771 | <i>Hem</i>     | 0.1859                                          |
| 39              | NA                                              | FBgn0000634 | <i>Fas1</i>    | 0.1805                                          |
| 40              | NA                                              | FBgn0003660 | <i>Syb</i>     | 0.1787                                          |
| 41              | NA                                              | FBgn0016718 | <i>Reg-3</i>   | 0.1776                                          |
| 42              | yes                                             | FBgn0000606 | <i>eve</i>     | 0.1774                                          |
| 43              | NA                                              | FBgn0004364 | <i>18w</i>     | 0.1687                                          |
| 44              | NA                                              | FBgn0004379 | <i>Klp67A</i>  | 0.1627                                          |
| 45              | NA                                              | FBgn0025741 | <i>plexA</i>   | 0.1610                                          |
| 46              | NA                                              | FBgn0015954 | <i>kuz</i>     | 0.1603                                          |
| 47              | NA                                              | FBgn0020224 | <i>Cbl</i>     | 0.1500                                          |
| 48              | NA                                              | FBgn0003177 | <i>pyd</i>     | 0.1444                                          |
| 49              | yes                                             | FBgn0003499 | <i>sr</i>      | 0.1436                                          |
| 50              | NA                                              | FBgn0011706 | <i>rpr</i>     | 0.1407                                          |
| 51              | NA                                              | FBgn0004574 | <i>Rop</i>     | 0.1386                                          |
| 52              | NA                                              | FBgn0004449 | <i>Ten-m</i>   | 0.1367                                          |
| 53              | NA                                              | FBgn0010410 | <i>RpL27A</i>  | 0.1290                                          |
| 54              | NA                                              | FBgn0003302 | <i>ruv</i>     | 0.1288                                          |
| 55              | NA                                              | FBgn0020910 | <i>RpL3</i>    | 0.1242                                          |
| 56              | yes                                             | FBgn0003749 | <i>trh</i>     | 0.1236                                          |
| 57              | NA                                              | FBgn0025185 | <i>az2</i>     | 0.1167                                          |
| 58              | NA                                              | FBgn0024754 | <i>Flo</i>     | 0.1109                                          |
| 59              | yes                                             | FBgn0005592 | <i>btl</i>     | 0.1080                                          |
| 60              | NA                                              | FBgn0026418 | <i>Hsc70Cb</i> | 0.0938                                          |
| 61              | yes                                             | FBgn0005558 | <i>ey</i>      | 0.0903                                          |
| 62              | yes                                             | FBgn0000719 | <i>fog</i>     | 0.0866                                          |
| 63              | NA                                              | FBgn0005624 | <i>Psc</i>     | 0.0848                                          |
| 64              | NA                                              | FBgn0020391 | <i>Nrk</i>     | 0.0829                                          |
| 65              | NA                                              | FBgn0015617 | <i>Cdk7</i>    | 0.0818                                          |
| 66              | NA                                              | FBgn0004867 | <i>sop</i>     | 0.0812                                          |
| 67              | NA                                              | FBgn0003124 | <i>polo</i>    | 0.0787                                          |
| 68              | NA                                              | FBgn0020440 | <i>Fak56D</i>  | 0.0787                                          |
| 69              | NA                                              | FBgn0004427 | <i>LysD</i>    | 0.0785                                          |
| 70              | yes                                             | FBgn0003209 | <i>raw</i>     | 0.0764                                          |

continued on next page...

*Table 9 continued from previous page.*

| Prediction Rank | Supported with GO:Biological Process annotation | Gene ID     | Gene name      | Confidence Score (distance from the hyperplane) |
|-----------------|-------------------------------------------------|-------------|----------------|-------------------------------------------------|
| 71              | yes                                             | FBgn0000659 | <i>fkh</i>     | 0.0762                                          |
| 72              | NA                                              | FBgn0011818 | <i>oaf</i>     | 0.0758                                          |
| 73              | NA                                              | FBgn0020378 | <i>Sp1</i>     | 0.0744                                          |
| 74              | NA                                              | FBgn0020278 | <i>loco</i>    | 0.0732                                          |
| 75              | NA                                              | FBgn0025680 | <i>cry</i>     | 0.0728                                          |
| 76              | NA                                              | FBgn0005771 | <i>noc</i>     | 0.0702                                          |
| 77              | yes                                             | FBgn0003310 | <i>S</i>       | 0.0655                                          |
| 78              | yes                                             | FBgn0000014 | <i>abd-A</i>   | 0.0639                                          |
| 79              | NA                                              | FBgn0026181 | <i>rok</i>     | 0.0636                                          |
| 80              | NA                                              | FBgn0013809 | <i>Dhc16F</i>  | 0.0636                                          |
| 81              | NA                                              | FBgn0003210 | <i>rb</i>      | 0.0621                                          |
| 82              | NA                                              | FBgn0003411 | <i>sisA</i>    | 0.0616                                          |
| 83              | yes                                             | FBgn0001180 | <i>hb</i>      | 0.0612                                          |
| 84              | NA                                              | FBgn0010109 | <i>dpn</i>     | 0.0595                                          |
| 85              | NA                                              | FBgn0000075 | <i>amd</i>     | 0.0589                                          |
| 86              | NA                                              | FBgn0004622 | <i>Takr99D</i> | 0.0576                                          |
| 87              | NA                                              | FBgn0015295 | <i>shark</i>   | 0.0494                                          |
| 88              | NA                                              | FBgn0011672 | <i>Mvl</i>     | 0.0489                                          |
| 89              | NA                                              | FBgn0000566 | <i>Eip55E</i>  | 0.0466                                          |

## References

- [1] Drysdale RA, Crosby MA (2005) FlyBase: genes and gene models. *Nucleic Acids Res* 33:D390–5.
