# Supplementary material
Source: PubMed Central journal article supplement (PMC1933477)
Supplement: pcbi.0030144.st010.pdf [file pcbi.0030144.st010.pdf]

## ***De novo* prediction of localization of expression for the 30% fraction of genes characterized with high prediction scores**

The *de novo* predictions of localization of expression for the 30% fraction of genes characterized with high prediction scores obtained for each functional unit are verified with Gene Ontology terms from the Biological Process category. As a rule a gene is annotated with many GO:Biological Process terms. The *de novo* prediction of localization of expression for a gene is confirmed with GO term (the respective gene is marked with "yes" sign in the tables below), if and only if, the gene is annotated with at least one GO:Biological process term relevant to the developmental process the anatomical structures comprising the functional unit under study are known to be involved in. If the GO:Biological process annotation does not contain evidence in support of prediction of localization of expression a gene is assigned with "Not Annotated" ("NA") symbol in the tables. The GO:Biological Process annotation for *Drosophila* genes can be found in the data support files for this manuscript or in FlyBase database [1] at [www.flybase.net](http://www.flybase.net).

Table 10: **Results of prediction of localization of gene expression for functional unit pep2ebrain:** embryonic central brain && protocerebrum primordium && procephalic ectoderm primordium

| Prediction Rank           | Supported with GO:Biological Process annotation | Gene ID     | Gene name                       | Confidence Score (distance from the hyperplane) |
|---------------------------|-------------------------------------------------|-------------|---------------------------------|-------------------------------------------------|
| 1                         | yes                                             | FBgn0001139 | <i>gro</i>                      | 13.8571                                         |
| 2                         | NA                                              | FBgn0020496 | <i>CtBP</i>                     | 12.2987                                         |
| 3                         | yes                                             | FBgn0014163 | <i>fax</i>                      | 12.1705                                         |
| 4                         | NA                                              | FBgn0003498 | <i>sqd</i>                      | 11.8179                                         |
| 5                         | NA                                              | FBgn0015622 | <i>Cnx99A</i>                   | 11.4479                                         |
| 6                         | yes                                             | FBgn0010333 | <i>Rac1</i>                     | 11.4310                                         |
| 7                         | NA                                              | FBgn0011760 | <i>ctp</i>                      | 11.2622                                         |
| 8                         | NA                                              | FBgn0020910 | <i>RpL3</i>                     | 10.5409                                         |
| 9                         | NA                                              | FBgn0010410 | <i>RpL27A</i>                   | 10.1206                                         |
| 10                        | NA                                              | FBgn0003885 | $\alpha$ <i>Tub84D</i>          | 9.7893                                          |
| 11                        | NA                                              | FBgn0014857 | <i>His3.3A</i>                  | 9.5983                                          |
| 12                        | yes                                             | FBgn0003053 | <i>peb</i>                      | 9.5226                                          |
| 13                        | yes                                             | FBgn0004108 | <i>Nrt</i>                      | 9.5063                                          |
| 14                        | NA                                              | FBgn0001105 | <i>G<math>\beta</math>13F</i>   | 9.4496                                          |
| 15                        | yes                                             | FBgn0014184 | <i>Oda</i>                      | 9.3732                                          |
| 16                        | yes                                             | FBgn0004907 | <i>14-3-3<math>\zeta</math></i> | 9.3489                                          |
| 17                        | NA                                              | FBgn0004867 | <i>sop</i>                      | 9.2384                                          |
| 18                        | NA                                              | FBgn0024939 | <i>RpL8</i>                     | 9.0460                                          |
| 19                        | NA                                              | FBgn0000097 | <i>aop</i>                      | 8.6087                                          |
| 20                        | NA                                              | FBgn0020615 | <i>SelD</i>                     | 8.5423                                          |
| 21                        | yes                                             | FBgn0003995 | <i>vvl</i>                      | 8.4689                                          |
| 22                        | yes                                             | FBgn0024250 | <i>brk</i>                      | 8.4506                                          |
| 23                        | NA                                              | FBgn0015805 | <i>Rpd3</i>                     | 8.3159                                          |
| 24                        | NA                                              | FBgn0028519 | <i>CG4500</i>                   | 8.1256                                          |
| continued on next page... |                                                 |             |                                 |                                                 |

Table 10 continued from previous page.

| Prediction Rank | Supported with GO:Biological Process annotation | Gene ID     | Gene name                       | Confidence Score (distance from the hyperplane) |
|-----------------|-------------------------------------------------|-------------|---------------------------------|-------------------------------------------------|
| 25              | yes                                             | FBgn0000308 | <i>chic</i>                     | 7.9656                                          |
| 26              | yes                                             | FBgn0001235 | <i>hth</i>                      | 7.8935                                          |
| 27              | NA                                              | FBgn0004364 | <i>18w</i>                      | 7.6850                                          |
| 28              | NA                                              | FBgn0004177 | <i>mts</i>                      | 7.5565                                          |
| 29              | NA                                              | FBgn0011817 | <i>nmo</i>                      | 7.5545                                          |
| 30              | yes                                             | FBgn0000413 | <i>da</i>                       | 7.5429                                          |
| 31              | NA                                              | FBgn0003471 | <i><math>\beta</math>-Spec</i>  | 7.5041                                          |
| 32              | yes                                             | FBgn0004606 | <i>zfh1</i>                     | 7.3404                                          |
| 33              | yes                                             | FBgn0002777 | <i>mnb</i>                      | 7.3242                                          |
| 34              | NA                                              | FBgn0004237 | <i>Hrb87F</i>                   | 7.2800                                          |
| 35              | NA                                              | FBgn0003941 | <i>RpL40</i>                    | 7.2751                                          |
| 36              | NA                                              | FBgn0003377 | <i>Sgs7</i>                     | 7.2304                                          |
| 37              | NA                                              | FBgn0003942 | <i>RpS27A</i>                   | 7.2268                                          |
| 38              | yes                                             | FBgn0003326 | <i>sca</i>                      | 7.1966                                          |
| 39              | NA                                              | FBgn0000405 | <i>CycB</i>                     | 7.0991                                          |
| 40              | NA                                              | FBgn0003501 | <i>Src64B</i>                   | 7.0519                                          |
| 41              | yes                                             | FBgn0003310 | <i>S</i>                        | 6.9174                                          |
| 42              | NA                                              | FBgn0003002 | <i>opa</i>                      | 6.9040                                          |
| 43              | NA                                              | FBgn0020369 | <i>Pros45</i>                   | 6.8997                                          |
| 44              | NA                                              | FBgn0003866 | <i>tsh</i>                      | 6.8960                                          |
| 45              | NA                                              | FBgn0003177 | <i>pyd</i>                      | 6.6653                                          |
| 46              | NA                                              | FBgn0004133 | <i>blow</i>                     | 6.6602                                          |
| 47              | yes                                             | FBgn0002945 | <i>nkd</i>                      | 6.6601                                          |
| 48              | NA                                              | FBgn0003887 | <i><math>\beta</math>Tub56D</i> | 6.5789                                          |
| 49              | NA                                              | FBgn0004362 | <i>HmgD</i>                     | 6.5614                                          |
| 50              | NA                                              | FBgn0004427 | <i>LysD</i>                     | 6.5324                                          |
| 51              | NA                                              | FBgn0015763 | <i>lic</i>                      | 6.5020                                          |
| 52              | NA                                              | FBgn0015239 | <i>Hr78</i>                     | 6.4408                                          |
| 53              | NA                                              | FBgn0013343 | <i>Syx1A</i>                    | 6.4082                                          |
| 54              | NA                                              | FBgn0023441 | <i>fus</i>                      | 6.3593                                          |
| 55              | NA                                              | FBgn0003963 | <i>ush</i>                      | 6.3319                                          |
| 56              | NA                                              | FBgn0000042 | <i>Act5C</i>                    | 6.2664                                          |
| 57              | NA                                              | FBgn0004003 | <i>wbl</i>                      | 6.1980                                          |
| 58              | yes                                             | FBgn0003892 | <i>ptc</i>                      | 6.1305                                          |
| 59              | yes                                             | FBgn0001077 | <i>ftz</i>                      | 6.0059                                          |
| 60              | NA                                              | FBgn0014011 | <i>Rac2</i>                     | 5.9803                                          |
| 61              | NA                                              | FBgn0000150 | <i>awd</i>                      | 5.9343                                          |
| 62              | yes                                             | FBgn0004053 | <i>zen</i>                      | 5.9191                                          |
| 63              | NA                                              | FBgn0014870 | <i>Psi</i>                      | 5.8882                                          |
| 64              | NA                                              | FBgn0003118 | <i>pnt</i>                      | 5.8771                                          |
| 65              | yes                                             | FBgn0026181 | <i>rok</i>                      | 5.7088                                          |
| 66              | yes                                             | FBgn0003651 | <i>svp</i>                      | 5.6886                                          |
| 67              | NA                                              | FBgn0005278 | <i>M(2)21AB</i>                 | 5.6299                                          |
| 68              | NA                                              | FBgn0027343 | <i>fz3</i>                      | 5.5626                                          |
| 69              | NA                                              | FBgn0003210 | <i>rb</i>                       | 5.5013                                          |
| 70              | yes                                             | FBgn0052372 | <i>CG32372</i>                  | 5.4465                                          |

continued on next page...

| Table 10 continued from previous page. |                                                 |             |                                 |                                                 |
|----------------------------------------|-------------------------------------------------|-------------|---------------------------------|-------------------------------------------------|
| Prediction Rank                        | Supported with GO:Biological Process annotation | Gene ID     | Gene name                       | Confidence Score (distance from the hyperplane) |
| 71                                     | yes                                             | FBgn0004179 | <i>Csp</i>                      | 5.4383                                          |
| 72                                     | yes                                             | FBgn0000273 | <i>Pka-C1</i>                   | 5.4012                                          |
| 73                                     | NA                                              | FBgn0000046 | <i>Act87E</i>                   | 5.3949                                          |
| 74                                     | NA                                              | FBgn0041186 | <i>Slbp</i>                     | 5.3550                                          |
| 75                                     | NA                                              | FBgn0015625 | <i>CycB3</i>                    | 5.3462                                          |
| 76                                     | NA                                              | FBgn0004509 | <i>Fur1</i>                     | 5.3093                                          |
| 77                                     | yes                                             | FBgn0001104 | <i>G-<math>\alpha</math>65A</i> | 5.3028                                          |
| 78                                     | yes                                             | FBgn0010105 | <i>comm</i>                     | 5.2662                                          |
| 79                                     | yes                                             | FBgn0000340 | <i>cno</i>                      | 5.2191                                          |
| 80                                     | yes                                             | FBgn0005592 | <i>btl</i>                      | 5.1844                                          |
| 81                                     | yes                                             | FBgn0002973 | <i>numb</i>                     | 5.1702                                          |
| 82                                     | yes                                             | FBgn0024836 | <i>stan</i>                     | 5.1629                                          |
| 83                                     | yes                                             | FBgn0014343 | <i>mirr</i>                     | 5.1539                                          |
| 84                                     | NA                                              | FBgn0004425 | <i>LysB</i>                     | 5.1538                                          |
| 85                                     | yes                                             | FBgn0015380 | <i>drl</i>                      | 5.1158                                          |
| 86                                     | NA                                              | FBgn0000043 | <i>Act42A</i>                   | 5.1015                                          |
| 87                                     | NA                                              | FBgn0024234 | <i>gbb</i>                      | 5.0911                                          |
| 88                                     | yes                                             | FBgn0000499 | <i>dsh</i>                      | 5.0850                                          |
| 89                                     | NA                                              | FBgn0004828 | <i>His3.3B</i>                  | 5.0326                                          |
| 90                                     | NA                                              | FBgn0002989 | <i>okr</i>                      | 5.0274                                          |
| 91                                     | NA                                              | FBgn0016696 | <i>Pitslre</i>                  | 5.0183                                          |
| 92                                     | NA                                              | FBgn0012037 | <i>Ance</i>                     | 4.9827                                          |
| 93                                     | yes                                             | FBgn0004647 | <i>N</i>                        | 4.8935                                          |
| 94                                     | NA                                              | FBgn0001565 | <i>Hlc</i>                      | 4.8580                                          |
| 95                                     | NA                                              | FBgn0004399 | <i>psq</i>                      | 4.8255                                          |
| 96                                     | NA                                              | FBgn0003512 | <i>Sry-<math>\delta</math></i>  | 4.8240                                          |
| 97                                     | yes                                             | FBgn0003430 | <i>slp1</i>                     | 4.8109                                          |
| 98                                     | yes                                             | FBgn0003986 | <i>vnd</i>                      | 4.7892                                          |
| 99                                     | NA                                              | FBgn0014028 | <i>SdhB</i>                     | 4.7829                                          |
| 100                                    | NA                                              | FBgn0038224 | <i>CG3321</i>                   | 4.7388                                          |
| 101                                    | NA                                              | FBgn0011672 | <i>Mvl</i>                      | 4.7353                                          |
| 102                                    | yes                                             | FBgn0005672 | <i>spi</i>                      | 4.7237                                          |
| 103                                    | NA                                              | FBgn0004456 | <i>mew</i>                      | 4.7229                                          |
| 104                                    | yes                                             | FBgn0000459 | <i>disco</i>                    | 4.7048                                          |
| 105                                    | NA                                              | FBgn0001404 | <i>egh</i>                      | 4.7037                                          |
| 106                                    | yes                                             | FBgn0000570 | <i>elav</i>                     | 4.6986                                          |
| 107                                    | NA                                              | FBgn0024923 | <i>TER94</i>                    | 4.6936                                          |
| 108                                    | yes                                             | FBgn0003749 | <i>trh</i>                      | 4.6703                                          |
| 109                                    | NA                                              | FBgn0015218 | <i>eIF-4E</i>                   | 4.6636                                          |
| 110                                    | NA                                              | FBgn0014388 | <i>sty</i>                      | 4.5951                                          |
| 111                                    | NA                                              | FBgn0025140 | <i>pit</i>                      | 4.5889                                          |
| 112                                    | yes                                             | FBgn0015014 | <i>tgo</i>                      | 4.5820                                          |
| 113                                    | yes                                             | FBgn0003391 | <i>shg</i>                      | 4.5685                                          |
| 114                                    | NA                                              | FBgn0001257 | <i>ImpL2</i>                    | 4.5494                                          |
| 115                                    | NA                                              | FBgn0020378 | <i>Sp1</i>                      | 4.5112                                          |
| 116                                    | NA                                              | FBgn0004551 | <i>Ca-P60A</i>                  | 4.5034                                          |
| continued on next page...              |                                                 |             |                                 |                                                 |

*Table 10 continued from previous page.*

| Prediction Rank | Supported with GO:Biological Process annotation | Gene ID     | Gene name     | Confidence Score (distance from the hyperplane) |
|-----------------|-------------------------------------------------|-------------|---------------|-------------------------------------------------|
| 117             | NA                                              | FBgn0000615 | <i>exu</i>    | 4.4831                                          |
| 118             | NA                                              | FBgn0032408 | <i>CG6712</i> | 4.4170                                          |
| 119             | NA                                              | FBgn0004449 | <i>Ten-m</i>  | 4.4159                                          |
| 120             | yes                                             | FBgn0004009 | <i>wg</i>     | 4.3906                                          |
| 121             | NA                                              | FBgn0010278 | <i>Ssrp</i>   | 4.3492                                          |
| 122             | NA                                              | FBgn0002413 | <i>dco</i>    | 4.3335                                          |
| 123             | NA                                              | FBgn0000568 | <i>Eip75B</i> | 4.2971                                          |
| 124             | yes                                             | FBgn0003165 | <i>pum</i>    | 4.2872                                          |
| 125             | NA                                              | FBgn0013811 | <i>Dhc62B</i> | 4.2754                                          |
| 126             | yes                                             | FBgn0013765 | <i>cnn</i>    | 4.2496                                          |
| 127             | NA                                              | FBgn0013974 | <i>Gyc76C</i> | 4.2472                                          |
| 128             | yes                                             | FBgn0020391 | <i>Nrk</i>    | 4.2173                                          |
| 129             | NA                                              | FBgn0005624 | <i>Psc</i>    | 4.2062                                          |
| 130             | NA                                              | FBgn0011715 | <i>Snr1</i>   | 4.2045                                          |
| 131             | yes                                             | FBgn0003719 | <i>tld</i>    | 4.1924                                          |
| 132             | yes                                             | FBgn0010575 | <i>sbb</i>    | 4.1730                                          |
| 133             | yes                                             | FBgn0013272 | <i>Gp150</i>  | 4.1729                                          |
| 134             | NA                                              | FBgn0003068 | <i>per</i>    | 4.1613                                          |
| 135             | NA                                              | FBgn0004426 | <i>LysC</i>   | 4.1175                                          |
| 136             | NA                                              | FBgn0024811 | <i>Crk</i>    | 4.0998                                          |
| 137             | NA                                              | FBgn0001090 | <i>bnb</i>    | 4.0960                                          |
| 138             | yes                                             | FBgn0003660 | <i>Syb</i>    | 4.0479                                          |
| 139             | yes                                             | FBgn0010341 | <i>Cdc42</i>  | 4.0164                                          |
| 140             | NA                                              | FBgn0015617 | <i>Cdk7</i>   | 4.0100                                          |
| 141             | NA                                              | FBgn0004897 | <i>fd96Ca</i> | 3.9875                                          |
| 142             | NA                                              | FBgn0020278 | <i>loco</i>   | 3.9615                                          |
| 143             | yes                                             | FBgn0001319 | <i>kn</i>     | 3.9563                                          |
| 144             | yes                                             | FBgn0003285 | <i>rst</i>    | 3.9456                                          |
| 145             | NA                                              | FBgn0000566 | <i>Eip55E</i> | 3.9351                                          |
| 146             | NA                                              | FBgn0017418 | <i>ari-1</i>  | 3.9311                                          |

## References

- [1] Drysdale RA, Crosby MA (2005) FlyBase: genes and gene models. *Nucleic Acids Res* 33:D390–5.
