# Supplementary material
Source: PubMed Central journal article supplement (PMC1933477)
Supplement: pcbi.0030144.st011.pdf [file pcbi.0030144.st011.pdf]

## ***De novo* prediction of localization of expression for the 30% fraction of genes characterized with high prediction scores**

The *de novo* predictions of localization of expression for the 30% fraction of genes characterized with high prediction scores obtained for each functional unit are verified with Gene Ontology terms from the Biological Process category. As a rule a gene is annotated with many GO:Biological Process terms. The *de novo* prediction of localization of expression for a gene is confirmed with GO term (the respective gene is marked with "yes" sign in the tables below), if and only if, the gene is annotated with at least one GO:Biological process term relevant to the developmental process the anatomical structures comprising the functional unit under study are known to be involved in. If the GO:Biological process annotation does not contain evidence in support of prediction of localization of expression a gene is assigned with "Not Annotated" ("NA") symbol in the tables. The GO:Biological Process annotation for *Drosophila* genes can be found in the data support files for this manuscript or in FlyBase database [1] at [www.flybase.net](http://www.flybase.net).

Table 11: **Results of prediction of localization of gene expression for functional unit *vna2lcord*: lateral cord && ventral nerve cord primordium && ventral neuroderm anlage**

| Prediction Rank | Supported with GO:Biological Process annotation | Gene ID     | Gene name       | Confidence Score (distance from the hyperplane) |
|-----------------|-------------------------------------------------|-------------|-----------------|-------------------------------------------------|
| 1               | NA                                              | FBgn0002989 | <i>okr</i>      | 0.5567                                          |
| 2               | yes                                             | FBgn0005654 | <i>lat</i>      | 0.5146                                          |
| 3               | NA                                              | FBgn0001150 | <i>gt</i>       | 0.5085                                          |
| 4               | NA                                              | FBgn0029088 | <i>disp</i>     | 0.5055                                          |
| 5               | yes                                             | FBgn0003391 | <i>shg</i>      | 0.5043                                          |
| 6               | NA                                              | FBgn0002283 | <i>l(3)73Ah</i> | 0.4992                                          |
| 7               | NA                                              | FBgn0000307 | <i>chif</i>     | 0.4947                                          |
| 8               | NA                                              | FBgn0005596 | <i>yema</i>     | 0.4883                                          |
| 9               | yes                                             | FBgn0026181 | <i>rok</i>      | 0.4755                                          |
| 10              | NA                                              | FBgn0019686 | <i>lok</i>      | 0.4653                                          |
| 11              | yes                                             | FBgn0002932 | <i>neur</i>     | 0.4530                                          |
| 12              | NA                                              | FBgn0003302 | <i>rux</i>      | 0.4433                                          |
| 13              | NA                                              | FBgn0015763 | <i>lic</i>      | 0.4284                                          |
| 14              | NA                                              | FBgn0014076 | <i>Vm32E</i>    | 0.4283                                          |
| 15              | yes                                             | FBgn0000340 | <i>cno</i>      | 0.4271                                          |
| 16              | NA                                              | FBgn0020249 | <i>stck</i>     | 0.4251                                          |
| 17              | NA                                              | FBgn0003079 | <i>phl</i>      | 0.4249                                          |
| 18              | yes                                             | FBgn0004053 | <i>zen</i>      | 0.4164                                          |
| 19              | yes                                             | FBgn0000577 | <i>en</i>       | 0.4162                                          |
| 20              | NA                                              | FBgn0003377 | <i>Sgs7</i>     | 0.4120                                          |
| 21              | NA                                              | FBgn0014870 | <i>Psi</i>      | 0.4033                                          |
| 22              | NA                                              | FBgn0000233 | <i>btd</i>      | 0.3991                                          |
| 23              | yes                                             | FBgn0003651 | <i>svp</i>      | 0.3989                                          |
| 24              | NA                                              | FBgn0000359 | <i>Cp36</i>     | 0.3808                                          |

*continued on next page...*

Table 11 continued from previous page.

| Prediction Rank | Supported with GO:Biological Process annotation | Gene ID     | Gene name                    | Confidence Score (distance from the hyperplane) |
|-----------------|-------------------------------------------------|-------------|------------------------------|-------------------------------------------------|
| 25              | NA                                              | FBgn0003231 | <i>ref(2)P</i>               | 0.3803                                          |
| 26              | yes                                             | FBgn0027343 | <i>fz3</i>                   | 0.3772                                          |
| 27              | NA                                              | FBgn0000146 | <i>aub</i>                   | 0.3766                                          |
| 28              | NA                                              | FBgn0000287 | <i>salr</i>                  | 0.3746                                          |
| 29              | NA                                              | FBgn0010357 | <i><math>\beta</math>Try</i> | 0.3729                                          |
| 30              | yes                                             | FBgn0004179 | <i>Csp</i>                   | 0.3715                                          |
| 31              | NA                                              | FBgn0004399 | <i>psq</i>                   | 0.3696                                          |
| 32              | NA                                              | FBgn0003285 | <i>rst</i>                   | 0.3686                                          |
| 33              | yes                                             | FBgn0024250 | <i>brk</i>                   | 0.3672                                          |
| 34              | yes                                             | FBgn0015773 | <i>NetA</i>                  | 0.3633                                          |
| 35              | yes                                             | FBgn0003892 | <i>ptc</i>                   | 0.3485                                          |
| 36              | yes                                             | FBgn0014133 | <i>bif</i>                   | 0.3432                                          |
| 37              | NA                                              | FBgn0010278 | <i>Ssrp</i>                  | 0.3425                                          |
| 38              | NA                                              | FBgn0004636 | <i>R</i>                     | 0.3398                                          |
| 39              | NA                                              | FBgn0024234 | <i>gbb</i>                   | 0.3378                                          |
| 40              | NA                                              | FBgn0000927 | <i>fs(1)Ya</i>               | 0.3369                                          |
| 41              | NA                                              | FBgn0000392 | <i>cup</i>                   | 0.3311                                          |
| 42              | NA                                              | FBgn0003200 | <i>rap</i>                   | 0.3291                                          |
| 43              | NA                                              | FBgn0002948 | <i>nod</i>                   | 0.3249                                          |
| 44              | NA                                              | FBgn0004897 | <i>fd96Ca</i>                | 0.3208                                          |
| 45              | NA                                              | FBgn0004378 | <i>Klp61F</i>                | 0.3173                                          |
| 46              | NA                                              | FBgn0015621 | <i>Clp</i>                   | 0.3115                                          |
| 47              | NA                                              | FBgn0000588 | <i>esc</i>                   | 0.3106                                          |
| 48              | NA                                              | FBgn0023441 | <i>fus</i>                   | 0.3089                                          |
| 49              | NA                                              | FBgn0039914 | <i>mav</i>                   | 0.3000                                          |
| 50              | yes                                             | FBgn0001978 | <i>stc</i>                   | 0.2996                                          |
| 51              | NA                                              | FBgn0016126 | <i>CaMKI</i>                 | 0.2965                                          |
| 52              | NA                                              | FBgn0004597 | <i>CycC</i>                  | 0.2951                                          |
| 53              | NA                                              | FBgn0003124 | <i>polo</i>                  | 0.2948                                          |
| 54              | NA                                              | FBgn0003117 | <i>pnr</i>                   | 0.2924                                          |
| 55              | yes                                             | FBgn0000221 | <i>brn</i>                   | 0.2903                                          |
| 56              | NA                                              | FBgn0022786 | <i>Hira</i>                  | 0.2900                                          |
| 57              | NA                                              | FBgn0003979 | <i>Vm26Aa</i>                | 0.2900                                          |
| 58              | NA                                              | FBgn0001079 | <i>fu</i>                    | 0.2897                                          |
| 59              | yes                                             | FBgn0003169 | <i>put</i>                   | 0.2860                                          |
| 60              | NA                                              | FBgn0015553 | <i>tos</i>                   | 0.2815                                          |
| 61              | NA                                              | FBgn0003507 | <i>srp</i>                   | 0.2785                                          |
| 62              | NA                                              | FBgn0011672 | <i>Mvl</i>                   | 0.2701                                          |
| 63              | NA                                              | FBgn0013531 | <i>MED20</i>                 | 0.2608                                          |
| 64              | NA                                              | FBgn0013725 | <i>phyl</i>                  | 0.2496                                          |
| 65              | NA                                              | FBgn0027945 | <i>ppl</i>                   | 0.2490                                          |
| 66              | NA                                              | FBgn0003141 | <i>pr</i>                    | 0.2396                                          |
| 67              | NA                                              | FBgn0017551 | <i>Rca1</i>                  | 0.2391                                          |
| 68              | NA                                              | FBgn0020299 | <i>stumps</i>                | 0.2305                                          |
| 69              | NA                                              | FBgn0025185 | <i>az2</i>                   | 0.2260                                          |
| 70              | yes                                             | FBgn0004110 | <i>tin</i>                   | 0.2223                                          |

continued on next page...

Table 11 continued from previous page.

| Prediction Rank | Supported with GO:Biological Process annotation | Gene ID     | Gene name        | Confidence Score (distance from the hyperplane) |
|-----------------|-------------------------------------------------|-------------|------------------|-------------------------------------------------|
| 71              | NA                                              | FBgn0000404 | <i>CycA</i>      | 0.2194                                          |
| 72              | yes                                             | FBgn0004795 | <i>retn</i>      | 0.2190                                          |
| 73              | NA                                              | FBgn0002736 | <i>mago</i>      | 0.2139                                          |
| 74              | NA                                              | FBgn0000490 | <i>dpp</i>       | 0.2134                                          |
| 75              | NA                                              | FBgn0004644 | <i>hh</i>        | 0.2109                                          |
| 76              | yes                                             | FBgn0025739 | <i>pon</i>       | 0.2091                                          |
| 77              | NA                                              | FBgn0003310 | <i>S</i>         | 0.2086                                          |
| 78              | NA                                              | FBgn0003177 | <i>pyd</i>       | 0.2044                                          |
| 79              | NA                                              | FBgn0004379 | <i>Klp67A</i>    | 0.2010                                          |
| 80              | NA                                              | FBgn0000719 | <i>fog</i>       | 0.1994                                          |
| 81              | NA                                              | FBgn0027375 | <i>RecQ5</i>     | 0.1967                                          |
| 82              | yes                                             | FBgn0010433 | <i>ato</i>       | 0.1907                                          |
| 83              | NA                                              | FBgn0000061 | <i>al</i>        | 0.1810                                          |
| 84              | NA                                              | FBgn0004367 | <i>mei-41</i>    | 0.1795                                          |
| 85              | yes                                             | FBgn0005592 | <i>btl</i>       | 0.1789                                          |
| 86              | yes                                             | FBgn0000163 | <i>baz</i>       | 0.1775                                          |
| 87              | NA                                              | FBgn0013987 | <i>MAPk-Ak2</i>  | 0.1750                                          |
| 88              | NA                                              | FBgn0000447 | <i>Dhod</i>      | 0.1659                                          |
| 89              | NA                                              | FBgn0004838 | <i>Hrb27C</i>    | 0.1635                                          |
| 90              | NA                                              | FBgn0003483 | <i>spn-E</i>     | 0.1544                                          |
| 91              | yes                                             | FBgn0002631 | <i>HLHm5</i>     | 0.1543                                          |
| 92              | NA                                              | FBgn0000356 | <i>Cp16</i>      | 0.1524                                          |
| 93              | yes                                             | FBgn0013272 | <i>Gp150</i>     | 0.1511                                          |
| 94              | NA                                              | FBgn0003250 | <i>Rh4</i>       | 0.1501                                          |
| 95              | NA                                              | FBgn0000277 | <i>CecA2</i>     | 0.1481                                          |
| 96              | NA                                              | FBgn0001565 | <i>Hlc</i>       | 0.1470                                          |
| 97              | NA                                              | FBgn0020496 | <i>CtBP</i>      | 0.1467                                          |
| 98              | NA                                              | FBgn0004360 | <i>Wnt2</i>      | 0.1453                                          |
| 99              | yes                                             | FBgn0000368 | <i>crb</i>       | 0.1443                                          |
| 100             | NA                                              | FBgn0004956 | <i>os</i>        | 0.1442                                          |
| 101             | NA                                              | FBgn0003567 | <i>su(Hw)</i>    | 0.1428                                          |
| 102             | NA                                              | FBgn0003204 | <i>ras</i>       | 0.1424                                          |
| 103             | NA                                              | FBgn0019664 | <i>pan</i>       | 0.1417                                          |
| 104             | yes                                             | FBgn0001325 | <i>Kr</i>        | 0.1416                                          |
| 105             | NA                                              | FBgn0013269 | <i>FK506-bp1</i> | 0.1414                                          |
| 106             | yes                                             | FBgn0002552 | <i>lin</i>       | 0.1395                                          |
| 107             | NA                                              | FBgn0002962 | <i>nos</i>       | 0.1394                                          |
| 108             | NA                                              | FBgn0015513 | <i>mbc</i>       | 0.1365                                          |
| 109             | yes                                             | FBgn0003520 | <i>stau</i>      | 0.1360                                          |
| 110             | NA                                              | FBgn0002936 | <i>ninaA</i>     | 0.1354                                          |
| 111             | NA                                              | FBgn0015816 | <i>Slh</i>       | 0.1274                                          |
| 112             | NA                                              | FBgn0004895 | <i>fd64A</i>     | 0.1251                                          |
| 113             | NA                                              | FBgn0027081 | <i>Aats-thr</i>  | 0.1226                                          |
| 114             | NA                                              | FBgn0000409 | <i>Cyt-c-p</i>   | 0.1225                                          |
| 115             | NA                                              | FBgn0000427 | <i>dec-1</i>     | 0.1209                                          |
| 116             | NA                                              | FBgn0011293 | <i>a10</i>       | 0.1204                                          |

continued on next page...

*Table 11 continued from previous page.*

| Prediction Rank | Supported with GO:Biological Process annotation | Gene ID     | Gene name       | Confidence Score (distance from the hyperplane) |
|-----------------|-------------------------------------------------|-------------|-----------------|-------------------------------------------------|
| 117             | yes                                             | FBgn0000413 | <i>da</i>       | 0.1192                                          |
| 118             | yes                                             | FBgn0003300 | <i>run</i>      | 0.1188                                          |
| 119             | NA                                              | FBgn0002940 | <i>ninaE</i>    | 0.1182                                          |
| 120             | NA                                              | FBgn0003205 | <i>Ras85D</i>   | 0.1181                                          |
| 121             | NA                                              | FBgn0027094 | <i>Aats-ala</i> | 0.1172                                          |
| 122             | NA                                              | FBgn0003411 | <i>sisA</i>     | 0.1162                                          |
| 123             | NA                                              | FBgn0003742 | <i>tra2</i>     | 0.1145                                          |
| 124             | NA                                              | FBgn0003900 | <i>twi</i>      | 0.1136                                          |
| 125             | NA                                              | FBgn0015011 | <i>Ahcy89E</i>  | 0.1132                                          |

## References

- [1] Drysdale RA, Crosby MA (2005) FlyBase: genes and gene models. *Nucleic Acids Res* 33:D390–5.
