# Supplementary material
Source: PubMed Central journal article supplement (PMC1933477)
Supplement: pcbi.0030144.st013.pdf [file pcbi.0030144.st013.pdf]

| Set of Genes                                 | Functional units                            |                                            |                                              |
|----------------------------------------------|---------------------------------------------|--------------------------------------------|----------------------------------------------|
|                                              | <b>pep2ebrian</b><br>and<br><b>aep2egut</b> | <b>aep2egut</b><br>and<br><b>vna2lcord</b> | <b>vna2lcord</b><br>and<br><b>pep2ebrian</b> |
| Training Set                                 | <b>2 genes</b><br>[5% and 3.7%]             | <b>1 gene</b><br>[1.8% and 2.9%]           | <b>17 genes</b><br>[50% and 42.5%]           |
| Top scored 30% of <i>de novo</i> predictions | <b>52 genes</b><br>[35.6% and 42.9%]        | <b>17 genes</b><br>[14% and 13.6%]         | <b>27 genes</b><br>[21.6% and 18.5%]         |

Table 13: Number of genes simultaneously attributed to two functional units encompassing developmental processes in the late embryogenesis. Genes shared between functional units are displayed in each column. Figures expressed as a percentage show a fraction of shared genes relative to the total number of genes associated with a functional unit. An arrangement of percentage figures reflects the order in which functional units are listed in the top row of the table.
