# Supplementary material
Source: PubMed Central journal article supplement (PMC1933477)
Supplement: pcbi.0030144.st014.pdf [file pcbi.0030144.st014.pdf]

Table 14: **Diversity of anatomical annotations of genes comprising functional unit mat2pep:**  
 procephalic ectoderm primordium && cellular blastoderm && maternal

| Anatomical Structures              | Genes                                                                                                                                                                                                                                                                                                                                                                                                                                                                                                                                                                                                                                                                                                                                                                                                                                                                                                                                                                                                                                                                                                                                                                                                                                                                                                                                                                                    |
|------------------------------------|------------------------------------------------------------------------------------------------------------------------------------------------------------------------------------------------------------------------------------------------------------------------------------------------------------------------------------------------------------------------------------------------------------------------------------------------------------------------------------------------------------------------------------------------------------------------------------------------------------------------------------------------------------------------------------------------------------------------------------------------------------------------------------------------------------------------------------------------------------------------------------------------------------------------------------------------------------------------------------------------------------------------------------------------------------------------------------------------------------------------------------------------------------------------------------------------------------------------------------------------------------------------------------------------------------------------------------------------------------------------------------------|
| ventral ectoderm anlage;           | FBgn0037878 CG6693 CG6693 LD05521<br>FBgn0010342 Map60 CG1825 LD02709<br>FBgn0036518 RhoGAP71E CG32149 LD04071<br>FBgn0036494 Toll-6 CG7250 LD08841<br>FBgn0011760 ctp CG6998 LD24056<br>FBgn0039537 CG5590 CG5590 GH01709<br>FBgn0028554 xl6 CG10203 LD46359<br>FBgn0002932 neur CG11988 LD45505<br>FBgn0039338 XNP CG4548 SD07188<br>FBgn0052066 CG32066 CG32066 GH09096<br>FBgn0037207 CG11100 CG11100 SD09884<br>FBgn0053097 CG33097 CG33097 GH12404<br>FBgn0031493 CG3605 CG3605 LD45152<br>FBgn0015903 apt CG5393 LD45581<br>FBgn0030468 CG1622 CG1622 GM12605<br>FBgn0052956 CG32956 CG32956 RE06926<br>FBgn0040230 dbo CG6224 RE13447<br>FBgn0001086 fzy CG4274 RE29723<br>FBgn0033749 achintya CG8819 RE51781<br>FBgn0032847 Taf18 CG10756 RE56212<br>FBgn0011638 La CG10922 RE69138<br>FBgn0011715 Snr1 CG1064 GH08712<br>FBgn0019637 Atu CG1433 LD30655<br>FBgn0032130 CG3838 CG3838 LD21447<br>FBgn0015903 apt CG5393 LD45581<br>FBgn0011766 E2f CG6376 GH16721<br>FBgn0015930 dpld CG1624 LD39167<br>FBgn0000611 exd CG8933 LD03509<br>FBgn0038192 CG9924 CG9924 GM07940<br>FBgn0029867 CG3847 CG3847 GM08802<br>FBgn0003346 Sd CG9999 LD16356<br>FBgn0038476 CG5175 CG5175 LD09231<br>FBgn0037066 CG7752 CG7752 LD15904<br>FBgn0010300 brat CG10719 LD16270<br>FBgn0038222 CG3307 CG3307 LD12042<br>FBgn0052434 CG32434 CG32434 RE02556<br>FBgn0038118 NULL CG7855 RE03551 |
| mesoderm anlage in statu nascendi; | FBgn0000611 exd CG8933 LD03509<br>FBgn0003346 Sd CG9999 LD16356                                                                                                                                                                                                                                                                                                                                                                                                                                                                                                                                                                                                                                                                                                                                                                                                                                                                                                                                                                                                                                                                                                                                                                                                                                                                                                                          |
| gap;                               | FBgn0040271 Sulfl CG6725 SD04414                                                                                                                                                                                                                                                                                                                                                                                                                                                                                                                                                                                                                                                                                                                                                                                                                                                                                                                                                                                                                                                                                                                                                                                                                                                                                                                                                         |

*continued on next page...*

| <i>Table 14 continued from previous page.</i> |                                                                                                                                                                                                                                                                                                                                                                                                                                                                                                                                                                                                                                     |
|-----------------------------------------------|-------------------------------------------------------------------------------------------------------------------------------------------------------------------------------------------------------------------------------------------------------------------------------------------------------------------------------------------------------------------------------------------------------------------------------------------------------------------------------------------------------------------------------------------------------------------------------------------------------------------------------------|
| Anatomical Structures                         | Genes                                                                                                                                                                                                                                                                                                                                                                                                                                                                                                                                                                                                                               |
| visual anlage in statu nascendi;              | FBgn0000611 exd CG8933 LD03509<br>FBgn0003346 Sd CG9999 LD16356                                                                                                                                                                                                                                                                                                                                                                                                                                                                                                                                                                     |
| segmentally repeated;                         | FBgn0032130 CG3838 CG3838 LD21447                                                                                                                                                                                                                                                                                                                                                                                                                                                                                                                                                                                                   |
| pole cell;                                    | FBgn0039211 CG13620 CG13620 SD03914<br>FBgn0046687 Tre1 CG3171 RE07751                                                                                                                                                                                                                                                                                                                                                                                                                                                                                                                                                              |
| antennal primordium2;                         | FBgn0003346 Sd CG9999 LD16356                                                                                                                                                                                                                                                                                                                                                                                                                                                                                                                                                                                                       |
| head mesoderm anlage;                         | FBgn0024332 Mcm3 CG4206 LD07144<br>FBgn0010226 GstS1 CG8938 LD21131<br>FBgn0037707 RnpS1 CG16788 LD23870<br>FBgn0039537 CG5590 CG5590 GH01709<br>FBgn0002932 neur CG11988 LD45505<br>FBgn0035205 CG2469 CG2469 LD24034<br>FBgn0052956 CG32956 CG32956 RE06926<br>FBgn0032847 Taf18 CG10756 RE56212<br>FBgn0011638 La CG10922 RE69138<br>FBgn0011715 Snr1 CG1064 GH08712<br>FBgn0032130 CG3838 CG3838 LD21447<br>FBgn0051365 CG31365 CG31365 LD28458<br>FBgn0000611 exd CG8933 LD03509<br>FBgn0003346 Sd CG9999 LD16356<br>FBgn0027620 Acf1 CG1966 LD09043<br>FBgn0038476 CG5175 CG5175 LD09231<br>FBgn0038222 CG3307 CG3307 LD12042 |
| hindgut anlage in statu nascendi;             | FBgn0040230 dbo CG6224 RE13447<br>FBgn0000611 exd CG8933 LD03509<br>FBgn0003346 Sd CG9999 LD16356                                                                                                                                                                                                                                                                                                                                                                                                                                                                                                                                   |
| procephalic ectoderm primordium;              | FBgn0037878 CG6693 CG6693 LD05521<br>NULL NULL NULL LD14406<br>FBgn0004378 Klp61F CG9191 LD15641<br>FBgn0010342 Map60 CG1825 LD02709<br>FBgn0036518 RhoGAP71E CG32149 LD04071<br>FBgn0027783 SMC2 CG10212 LD05471<br>FBgn0024332 Mcm3 CG4206 LD07144<br>FBgn0036494 Toll-6 CG7250 LD08841<br>FBgn0003346 Sd CG9999 LD16356<br>FBgn0003520 stau CG5753 LD13210<br>FBgn0020255 ran CG1404 GM14354<br>FBgn0010226 GstS1 CG8938 LD21131<br>FBgn0037707 RnpS1 CG16788 LD23870                                                                                                                                                            |

*continued on next page...*

*Table 14 continued from previous page.*

| Anatomical Structures | Genes                               |
|-----------------------|-------------------------------------|
|                       | FBgn0011760 ctp CG6998 LD24056      |
|                       | FBgn0029629 CG8636 CG8636 LD24347   |
|                       | FBgn0039537 CG5590 CG5590 GH01709   |
|                       | FBgn0003862 trx CG8651 LD39445      |
|                       | FBgn0028554 xl6 CG10203 LD46359     |
|                       | FBgn0004868 Gdi CG4422 LD46767      |
|                       | FBgn0039250 CG11120 CG11120 LD43724 |
|                       | FBgn0002932 neur CG11988 LD45505    |
|                       | FBgn0039338 XNP CG4548 SD07188      |
|                       | FBgn0052066 CG32066 CG32066 GH09096 |
|                       | FBgn0037207 CG11100 CG11100 SD09884 |
|                       | FBgn0053097 CG33097 CG33097 GH12404 |
|                       | FBgn0031493 CG3605 CG3605 LD45152   |
|                       | FBgn0015903 apt CG5393 LD45581      |
|                       | FBgn0030468 CG1622 CG1622 GM12605   |
|                       | FBgn0040271 Sulf1 CG6725 SD04414    |
|                       | FBgn0035205 CG2469 CG2469 LD24034   |
|                       | FBgn0027948 msps CG5000 GH18634     |
|                       | FBgn0052956 CG32956 CG32956 RE06926 |
|                       | FBgn0040230 dbo CG6224 RE13447      |
|                       | FBgn0036973 CG5585 CG5585 RE17089   |
|                       | FBgn0001086 fzy CG4274 RE29723      |
|                       | FBgn0013347 TfhIA-S CG5163 RE44302  |
|                       | FBgn0033749 achintya CG8819 RE51781 |
|                       | FBgn0032847 Taf18 CG10756 RE56212   |
|                       | FBgn0011638 La CG10922 RE69138      |
|                       | FBgn0017550 Rga CG2161 GM14102      |
|                       | FBgn0015396 jumu CG4029 LD24749     |
|                       | FBgn0011715 Snr1 CG1064 GH08712     |
|                       | FBgn0022720 zf30C CG3998 LD23102    |
|                       | FBgn0019637 Atu CG1433 LD30655      |
|                       | FBgn0039350 CG17383 CG17383 LD33329 |
|                       | FBgn0032130 CG3838 CG3838 LD21447   |
|                       | FBgn0051365 CG31365 CG31365 LD28458 |
|                       | FBgn0015903 apt CG5393 LD45581      |
|                       | FBgn0011766 E2f CG6376 GH16721      |
|                       | FBgn0005642 wdn CG1454 LD40824      |
|                       | FBgn0039211 CG13620 CG13620 SD03914 |
|                       | FBgn0015930 dpld CG1624 LD39167     |
|                       | FBgn0000611 exd CG8933 LD03509      |
|                       | FBgn0029903 CG4532 CG4532 LD08951   |
|                       | FBgn0038192 CG9924 CG9924 GM07940   |
|                       | FBgn0029867 CG3847 CG3847 GM08802   |
|                       | FBgn0003346 Sd CG9999 LD16356       |
|                       | FBgn0027620 Acf1 CG1966 LD09043     |
|                       | FBgn0038476 CG5175 CG5175 LD09231   |

*continued on next page...*

| <i>Table 14 continued from previous page.</i> |                                                                                                                                                                                                                                                                                                                                                                                                                                                                                                                                                             |
|-----------------------------------------------|-------------------------------------------------------------------------------------------------------------------------------------------------------------------------------------------------------------------------------------------------------------------------------------------------------------------------------------------------------------------------------------------------------------------------------------------------------------------------------------------------------------------------------------------------------------|
| Anatomical Structures                         | Genes                                                                                                                                                                                                                                                                                                                                                                                                                                                                                                                                                       |
|                                               | FBgn0037066 CG7752 CG7752 LD15904<br>FBgn0010300 brat CG10719 LD16270<br>FBgn0038222 CG3307 CG3307 LD12042<br>FBgn0052434 CG32434 CG32434 RE02556<br>FBgn0038118 NULL CG7855 RE03551<br>FBgn0046687 Tre1 CG3171 RE07751<br>FBgn0031878 CG9188 CG9188 RE16905<br>FBgn0045064 bwa CG13969 RE26924<br>FBgn0032919 CG9253 CG9253 RE27528<br>FBgn0029798 CG4078 CG4078 RE31401<br>FBgn0030507 CG11164 CG11164 RE50056<br>FBgn0037770 CG5358 CG5358 RE68504<br>FBgn0029512 Aos1 CG12276 LD33652                                                                   |
| subset;                                       | FBgn0036494 Toll-6 CG7250 LD08841<br>FBgn0037207 CG11100 CG11100 SD09884<br>FBgn0015903 apt CG5393 LD45581<br>FBgn0040271 Sulf1 CG6725 SD04414<br>FBgn0027948 msps CG5000 GH18634<br>FBgn0040230 dbo CG6224 RE13447<br>FBgn0015396 jumu CG4029 LD24749<br>FBgn0039350 CG17383 CG17383 LD33329<br>FBgn0015903 apt CG5393 LD45581<br>FBgn0011766 E2f CG6376 GH16721<br>FBgn0039211 CG13620 CG13620 SD03914<br>FBgn0038192 CG9924 CG9924 GM07940<br>FBgn0010300 brat CG10719 LD16270<br>FBgn0052434 CG32434 CG32434 RE02556<br>FBgn0045064 bwa CG13969 RE26924 |
| external foregut primordium;                  | FBgn0029629 CG8636 CG8636 LD24347<br>FBgn0015903 apt CG5393 LD45581<br>FBgn0038192 CG9924 CG9924 GM07940<br>FBgn0003346 Sd CG9999 LD16356                                                                                                                                                                                                                                                                                                                                                                                                                   |
| dorsal ectoderm primordium;                   | FBgn0036494 Toll-6 CG7250 LD08841<br>FBgn0015903 apt CG5393 LD45581<br>FBgn0040271 Sulf1 CG6725 SD04414<br>FBgn0032847 Taf18 CG10756 RE56212<br>FBgn0015396 jumu CG4029 LD24749<br>FBgn0015903 apt CG5393 LD45581<br>FBgn0000611 exd CG8933 LD03509<br>FBgn0003346 Sd CG9999 LD16356<br>FBgn0052434 CG32434 CG32434 RE02556                                                                                                                                                                                                                                 |
| endoderm anlage in statu nascendi;            | FBgn0003346 Sd CG9999 LD16356                                                                                                                                                                                                                                                                                                                                                                                                                                                                                                                               |
| <i>continued on next page...</i>              |                                                                                                                                                                                                                                                                                                                                                                                                                                                                                                                                                             |

| <i>Table 14 continued from previous page.</i> |                                                                                                                                                                                                                                                                                                                                                                                                                                                                                                                                                                                                                                                                                                                                                                                          |
|-----------------------------------------------|------------------------------------------------------------------------------------------------------------------------------------------------------------------------------------------------------------------------------------------------------------------------------------------------------------------------------------------------------------------------------------------------------------------------------------------------------------------------------------------------------------------------------------------------------------------------------------------------------------------------------------------------------------------------------------------------------------------------------------------------------------------------------------------|
| Anatomical Structures                         | Genes                                                                                                                                                                                                                                                                                                                                                                                                                                                                                                                                                                                                                                                                                                                                                                                    |
| head epidermis primordium;                    | FBgn0015903 apt CG5393 LD45581<br>FBgn0015903 apt CG5393 LD45581<br>FBgn0003346 Sd CG9999 LD16356                                                                                                                                                                                                                                                                                                                                                                                                                                                                                                                                                                                                                                                                                        |
| ventral neuroderm anlage;                     | FBgn0036494 Toll-6 CG7250 LD08841<br>FBgn0037707 RnpS1 CG16788 LD23870<br>FBgn0002932 neur CG11988 LD45505<br>FBgn0040271 Sulf1 CG6725 SD04414<br>FBgn0040230 dbo CG6224 RE13447<br>FBgn0032130 CG3838 CG3838 LD21447<br>FBgn0015903 apt CG5393 LD45581<br>FBgn0000611 exd CG8933 LD03509<br>FBgn0003346 Sd CG9999 LD16356<br>FBgn0038118 NULL CG7855 RE03551<br>FBgn0046687 Tre1 CG3171 RE07751<br>FBgn0031878 CG9188 CG9188 RE16905<br>FBgn0030507 CG11164 CG11164 RE50056<br>FBgn0037770 CG5358 CG5358 RE68504<br>FBgn0029512 Aos1 CG12276 LD33652                                                                                                                                                                                                                                    |
| trunk mesoderm anlage;                        | FBgn0024332 Mcm3 CG4206 LD07144<br>FBgn0010226 GstS1 CG8938 LD21131<br>FBgn0037707 RnpS1 CG16788 LD23870<br>FBgn0039537 CG5590 CG5590 GH01709<br>FBgn0003862 trx CG8651 LD39445<br>FBgn0002932 neur CG11988 LD45505<br>FBgn0052066 CG32066 CG32066 GH09096<br>FBgn0037207 CG11100 CG11100 SD09884<br>FBgn0031493 CG3605 CG3605 LD45152<br>FBgn0035205 CG2469 CG2469 LD24034<br>FBgn0052956 CG32956 CG32956 RE06926<br>FBgn0032847 Taf18 CG10756 RE56212<br>FBgn0011638 La CG10922 RE69138<br>FBgn0011715 Snr1 CG1064 GH08712<br>FBgn0032130 CG3838 CG3838 LD21447<br>FBgn0051365 CG31365 CG31365 LD28458<br>FBgn0000611 exd CG8933 LD03509<br>FBgn0003346 Sd CG9999 LD16356<br>FBgn0027620 Acf1 CG1966 LD09043<br>FBgn0038476 CG5175 CG5175 LD09231<br>FBgn0038222 CG3307 CG3307 LD12042 |
| anterior endoderm anlage;                     | FBgn0036518 RhoGAP71E CG32149 LD04071<br>FBgn0010226 GstS1 CG8938 LD21131<br>FBgn0037707 RnpS1 CG16788 LD23870                                                                                                                                                                                                                                                                                                                                                                                                                                                                                                                                                                                                                                                                           |
| <i>continued on next page...</i>              |                                                                                                                                                                                                                                                                                                                                                                                                                                                                                                                                                                                                                                                                                                                                                                                          |

| <i>Table 14 continued from previous page.</i> |                                       |
|-----------------------------------------------|---------------------------------------|
| Anatomical Structures                         | Genes                                 |
| ventral nerve cord primordium;                | FBgn0029629 CG8636 CG8636 LD24347     |
|                                               | FBgn0039537 CG5590 CG5590 GH01709     |
|                                               | FBgn0002932 neur CG11988 LD45505      |
|                                               | FBgn0053097 CG33097 CG33097 GH12404   |
|                                               | FBgn0031493 CG3605 CG3605 LD45152     |
|                                               | FBgn0032847 Taf18 CG10756 RE56212     |
|                                               | FBgn0011638 La CG10922 RE69138        |
|                                               | FBgn0032130 CG3838 CG3838 LD21447     |
|                                               | FBgn0051365 CG31365 CG31365 LD28458   |
|                                               | FBgn0015903 apt CG5393 LD45581        |
|                                               | FBgn0000611 exd CG8933 LD03509        |
|                                               | FBgn0003346 Sd CG9999 LD16356         |
|                                               | FBgn0038476 CG5175 CG5175 LD09231     |
|                                               | FBgn0038222 CG3307 CG3307 LD12042     |
|                                               | FBgn0037770 CG5358 CG5358 RE68504     |
|                                               | FBgn0037878 CG6693 CG6693 LD05521     |
|                                               | NULL NULL NULL LD14406                |
|                                               | FBgn0004378 Klp61F CG9191 LD15641     |
|                                               | FBgn0010342 Map60 CG1825 LD02709      |
|                                               | FBgn0036518 RhoGAP71E CG32149 LD04071 |
|                                               | FBgn0027783 SMC2 CG10212 LD05471      |
|                                               | FBgn0024332 Mcm3 CG4206 LD07144       |
|                                               | FBgn0036494 Toll-6 CG7250 LD08841     |
|                                               | FBgn0003346 Sd CG9999 LD16356         |
|                                               | FBgn0003520 stau CG5753 LD13210       |
|                                               | FBgn0020255 ran CG1404 GM14354        |
|                                               | FBgn0037707 RnpS1 CG16788 LD23870     |
|                                               | FBgn0039537 CG5590 CG5590 GH01709     |
|                                               | FBgn0003862 trx CG8651 LD39445        |
|                                               | FBgn0028554 xl6 CG10203 LD46359       |
|                                               | FBgn0004868 Gdi CG4422 LD46767        |
|                                               | FBgn0039250 CG11120 CG11120 LD43724   |
|                                               | FBgn0002932 neur CG11988 LD45505      |
|                                               | FBgn0039338 XNP CG4548 SD07188        |
|                                               | FBgn0052066 CG32066 CG32066 GH09096   |
|                                               | FBgn0053097 CG33097 CG33097 GH12404   |
|                                               | FBgn0031493 CG3605 CG3605 LD45152     |
|                                               | FBgn0030468 CG1622 CG1622 GM12605     |
|                                               | FBgn0040271 Sulf1 CG6725 SD04414      |
|                                               | FBgn0035205 CG2469 CG2469 LD24034     |
|                                               | FBgn0027948 msps CG5000 GH18634       |
|                                               | FBgn0040230 dbo CG6224 RE13447        |
|                                               | FBgn0036973 CG5585 CG5585 RE17089     |
|                                               | FBgn0013347 TfIIA-S CG5163 RE44302    |
|                                               | FBgn0033749 achintya CG8819 RE51781   |

*continued on next page...*

| <i>Table 14 continued from previous page.</i> |                                     |
|-----------------------------------------------|-------------------------------------|
| Anatomical Structures                         | Genes                               |
|                                               | FBgn0017550 Rga CG2161 GM14102      |
|                                               | FBgn0015396 jumu CG4029 LD24749     |
|                                               | FBgn0011715 Snr1 CG1064 GH08712     |
|                                               | FBgn0019637 Atu CG1433 LD30655      |
|                                               | FBgn0032130 CG3838 CG3838 LD21447   |
|                                               | FBgn0051365 CG31365 CG31365 LD28458 |
|                                               | FBgn0015903 apt CG5393 LD45581      |
|                                               | FBgn0011766 E2f CG6376 GH16721      |
|                                               | FBgn0005642 wdn CG1454 LD40824      |
|                                               | FBgn0015930 dpld CG1624 LD39167     |
|                                               | FBgn0000611 exd CG8933 LD03509      |
|                                               | FBgn0029903 CG4532 CG4532 LD08951   |
|                                               | FBgn0038192 CG9924 CG9924 GM07940   |
|                                               | FBgn0003346 Sd CG9999 LD16356       |
|                                               | FBgn0027620 Acf1 CG1966 LD09043     |
|                                               | FBgn0038476 CG5175 CG5175 LD09231   |
|                                               | FBgn0010300 brat CG10719 LD16270    |
|                                               | FBgn0038222 CG3307 CG3307 LD12042   |
|                                               | FBgn0052434 CG32434 CG32434 RE02556 |
|                                               | FBgn0038118 NULL CG7855 RE03551     |
|                                               | FBgn0046687 Tre1 CG3171 RE07751     |
|                                               | FBgn0031878 CG9188 CG9188 RE16905   |
|                                               | FBgn0029798 CG4078 CG4078 RE31401   |
|                                               | FBgn0030507 CG11164 CG11164 RE50056 |
|                                               | FBgn0029512 Aos1 CG12276 LD33652    |
| visual primordium;                            |                                     |
|                                               | FBgn0002932 neur CG11988 LD45505    |
|                                               | FBgn0015903 apt CG5393 LD45581      |
|                                               | FBgn0000611 exd CG8933 LD03509      |
|                                               | FBgn0003346 Sd CG9999 LD16356       |
|                                               | FBgn0052434 CG32434 CG32434 RE02556 |
| foregut anlage in statu nascendi;             |                                     |
|                                               | FBgn0000611 exd CG8933 LD03509      |
|                                               | FBgn0003346 Sd CG9999 LD16356       |
| procephalic ectoderm anlage;                  |                                     |
|                                               | FBgn0037878 CG6693 CG6693 LD05521   |
|                                               | FBgn0010342 Map60 CG1825 LD02709    |
|                                               | FBgn0036494 Toll-6 CG7250 LD08841   |
|                                               | FBgn0037707 RnpS1 CG16788 LD23870   |
|                                               | FBgn0011760 ctp CG6998 LD24056      |
|                                               | FBgn0028554 xl6 CG10203 LD46359     |
|                                               | FBgn0002932 neur CG11988 LD45505    |
|                                               | FBgn0039338 XNP CG4548 SD07188      |
|                                               | FBgn0053097 CG33097 CG33097 GH12404 |
|                                               | FBgn0015903 apt CG5393 LD45581      |
|                                               | FBgn0030468 CG1622 CG1622 GM12605   |

*continued on next page...*

Table 14 continued from previous page.

| Anatomical Structures      | Genes                                 |
|----------------------------|---------------------------------------|
|                            | FBgn0052956 CG32956 CG32956 RE06926   |
|                            | FBgn0040230 dbo CG6224 RE13447        |
|                            | FBgn0001086 fzy CG4274 RE29723        |
|                            | FBgn0033749 achintya CG8819 RE51781   |
|                            | FBgn0032847 Taf18 CG10756 RE56212     |
|                            | FBgn0011638 La CG10922 RE69138        |
|                            | FBgn0015903 apt CG5393 LD45581        |
|                            | FBgn0011766 E2f CG6376 GH16721        |
|                            | FBgn0039211 CG13620 CG13620 SD03914   |
|                            | FBgn0015930 dpld CG1624 LD39167       |
|                            | FBgn0000611 exd CG8933 LD03509        |
|                            | FBgn0038192 CG9924 CG9924 GM07940     |
|                            | FBgn0029867 CG3847 CG3847 GM08802     |
|                            | FBgn0003346 Sd CG9999 LD16356         |
|                            | FBgn0038476 CG5175 CG5175 LD09231     |
|                            | FBgn0037066 CG7752 CG7752 LD15904     |
|                            | FBgn0010300 brat CG10719 LD16270      |
|                            | FBgn0052434 CG32434 CG32434 RE02556   |
|                            | FBgn0038118 NULL CG7855 RE03551       |
|                            | FBgn0046687 Tre1 CG3171 RE07751       |
|                            | FBgn0031878 CG9188 CG9188 RE16905     |
|                            | FBgn0030507 CG11164 CG11164 RE50056   |
|                            | FBgn0029512 Aos1 CG12276 LD33652      |
| dorsal ectoderm anlage;    |                                       |
|                            | FBgn0015930 dpld CG1624 LD39167       |
|                            | FBgn0000611 exd CG8933 LD03509        |
|                            | FBgn0003346 Sd CG9999 LD16356         |
| mesectoderm primordium;    |                                       |
|                            | FBgn0002932 neur CG11988 LD45505      |
|                            | FBgn0003346 Sd CG9999 LD16356         |
| anlage in statu nascendi;  |                                       |
|                            | FBgn0036494 Toll-6 CG7250 LD08841     |
|                            | FBgn0040230 dbo CG6224 RE13447        |
|                            | FBgn0000611 exd CG8933 LD03509        |
|                            | FBgn0003346 Sd CG9999 LD16356         |
|                            | FBgn0045064 bwa CG13969 RE26924       |
| posterior endoderm anlage; |                                       |
|                            | FBgn0036518 RhoGAP71E CG32149 LD04071 |
|                            | FBgn0010226 GstS1 CG8938 LD21131      |
|                            | FBgn0037707 RnpS1 CG16788 LD23870     |
|                            | FBgn0029629 CG8636 CG8636 LD24347     |
|                            | FBgn0039537 CG5590 CG5590 GH01709     |
|                            | FBgn0002932 neur CG11988 LD45505      |
|                            | FBgn0039338 XNP CG4548 SD07188        |
|                            | FBgn0053097 CG33097 CG33097 GH12404   |
|                            | FBgn0031493 CG3605 CG3605 LD45152     |

continued on next page...



Table 14 continued from previous page.

| Anatomical Structures | Genes                                 |
|-----------------------|---------------------------------------|
| maternal;             | FBgn0015903 apt CG5393 LD45581        |
|                       | FBgn0052956 CG32956 CG32956 RE06926   |
|                       | FBgn0032847 Taf18 CG10756 RE56212     |
|                       | FBgn0011638 La CG10922 RE69138        |
|                       | FBgn0011715 Snr1 CG1064 GH08712       |
|                       | FBgn0019637 Atu CG1433 LD30655        |
|                       | FBgn0032130 CG3838 CG3838 LD21447     |
|                       | FBgn0051365 CG31365 CG31365 LD28458   |
|                       | FBgn0015903 apt CG5393 LD45581        |
|                       | FBgn0000611 exd CG8933 LD03509        |
|                       | FBgn0003346 Sd CG9999 LD16356         |
|                       | FBgn0038222 CG3307 CG3307 LD12042     |
|                       | FBgn0037770 CG5358 CG5358 RE68504     |
|                       | FBgn0037878 CG6693 CG6693 LD05521     |
|                       | NULL NULL NULL LD14406                |
|                       | FBgn0004378 Klp61F CG9191 LD15641     |
|                       | FBgn0010342 Map60 CG1825 LD02709      |
|                       | FBgn0036518 RhoGAP71E CG32149 LD04071 |
|                       | FBgn0027783 SMC2 CG10212 LD05471      |
|                       | FBgn0024332 Mcm3 CG4206 LD07144       |
|                       | FBgn0036494 Toll-6 CG7250 LD08841     |
|                       | FBgn0003346 Sd CG9999 LD16356         |
|                       | FBgn0003520 stau CG5753 LD13210       |
|                       | FBgn0020255 ran CG1404 GM14354        |
|                       | FBgn0010226 GstS1 CG8938 LD21131      |
|                       | FBgn0037707 RnpS1 CG16788 LD23870     |
|                       | FBgn0011760 ctp CG6998 LD24056        |
|                       | FBgn0029629 CG8636 CG8636 LD24347     |
|                       | FBgn0039537 CG5590 CG5590 GH01709     |
|                       | FBgn0003862 trx CG8651 LD39445        |
|                       | FBgn0028554 xl6 CG10203 LD46359       |
|                       | FBgn0004868 Gdi CG4422 LD46767        |
|                       | FBgn0039250 CG11120 CG11120 LD43724   |
|                       | FBgn0002932 neur CG11988 LD45505      |
|                       | FBgn0039338 XNP CG4548 SD07188        |
|                       | FBgn0052066 CG32066 CG32066 GH09096   |
|                       | FBgn0037207 CG11100 CG11100 SD09884   |
|                       | FBgn0053097 CG33097 CG33097 GH12404   |
|                       | FBgn0031493 CG3605 CG3605 LD45152     |
|                       | FBgn0015903 apt CG5393 LD45581        |
|                       | FBgn0030468 CG1622 CG1622 GM12605     |
|                       | FBgn0040271 Sulf1 CG6725 SD04414      |
|                       | FBgn0035205 CG2469 CG2469 LD24034     |
|                       | FBgn0027948 msps CG5000 GH18634       |
|                       | FBgn0052956 CG32956 CG32956 RE06926   |

*continued on next page...*

| <i>Table 14 continued from previous page.</i> |                                     |
|-----------------------------------------------|-------------------------------------|
| Anatomical Structures                         | Genes                               |
|                                               | FBgn0040230 dbo CG6224 RE13447      |
|                                               | FBgn0036973 CG5585 CG5585 RE17089   |
|                                               | FBgn0001086 fzy CG4274 RE29723      |
|                                               | FBgn0013347 TflIA-S CG5163 RE44302  |
|                                               | FBgn0033749 achintya CG8819 RE51781 |
|                                               | FBgn0032847 Taf18 CG10756 RE56212   |
|                                               | FBgn0011638 La CG10922 RE69138      |
|                                               | FBgn0017550 Rga CG2161 GM14102      |
|                                               | FBgn0015396 jumu CG4029 LD24749     |
|                                               | FBgn0011715 Snr1 CG1064 GH08712     |
|                                               | FBgn0022720 zf30C CG3998 LD23102    |
|                                               | FBgn0019637 Atu CG1433 LD30655      |
|                                               | FBgn0039350 CG17383 CG17383 LD33329 |
|                                               | FBgn0032130 CG3838 CG3838 LD21447   |
|                                               | FBgn0051365 CG31365 CG31365 LD28458 |
|                                               | FBgn0015903 apt CG5393 LD45581      |
|                                               | FBgn0011766 E2f CG6376 GH16721      |
|                                               | FBgn0005642 wdn CG1454 LD40824      |
|                                               | FBgn0039211 CG13620 CG13620 SD03914 |
|                                               | FBgn0015930 dpld CG1624 LD39167     |
|                                               | FBgn0000611 exd CG8933 LD03509      |
|                                               | FBgn0029903 CG4532 CG4532 LD08951   |
|                                               | FBgn0038192 CG9924 CG9924 GM07940   |
|                                               | FBgn0029867 CG3847 CG3847 GM08802   |
|                                               | FBgn0003346 Sd CG9999 LD16356       |
|                                               | FBgn0027620 Acf1 CG1966 LD09043     |
|                                               | FBgn0038476 CG5175 CG5175 LD09231   |
|                                               | FBgn0037066 CG7752 CG7752 LD15904   |
|                                               | FBgn0010300 brat CG10719 LD16270    |
|                                               | FBgn0038222 CG3307 CG3307 LD12042   |
|                                               | FBgn0052434 CG32434 CG32434 RE02556 |
|                                               | FBgn0038118 NULL CG7855 RE03551     |
|                                               | FBgn0046687 Tre1 CG3171 RE07751     |
|                                               | FBgn0031878 CG9188 CG9188 RE16905   |
|                                               | FBgn0045064 bwa CG13969 RE26924     |
|                                               | FBgn0032919 CG9253 CG9253 RE27528   |
|                                               | FBgn0029798 CG4078 CG4078 RE31401   |
|                                               | FBgn0030507 CG11164 CG11164 RE50056 |
|                                               | FBgn0037770 CG5358 CG5358 RE68504   |
|                                               | FBgn0029512 Aos1 CG12276 LD33652    |
| mesectoderm anlage;                           | FBgn0037707 RnpS1 CG16788 LD23870   |
|                                               | FBgn0002932 neur CG11988 LD45505    |
|                                               | FBgn0037207 CG11100 CG11100 SD09884 |
|                                               | FBgn0000611 exd CG8933 LD03509      |
|                                               | FBgn0003346 Sd CG9999 LD16356       |

*continued on next page...*

| <i>Table 14 continued from previous page.</i> |                                                                                                                                                                                                                                                                                                                                                                                                                                                                                                                                                                                                                                                                      |
|-----------------------------------------------|----------------------------------------------------------------------------------------------------------------------------------------------------------------------------------------------------------------------------------------------------------------------------------------------------------------------------------------------------------------------------------------------------------------------------------------------------------------------------------------------------------------------------------------------------------------------------------------------------------------------------------------------------------------------|
| Anatomical Structures                         | Genes                                                                                                                                                                                                                                                                                                                                                                                                                                                                                                                                                                                                                                                                |
| mesectoderm anlage in statu nascendi;         | FBgn0000611 exd CG8933 LD03509<br>FBgn0003346 Sd CG9999 LD16356                                                                                                                                                                                                                                                                                                                                                                                                                                                                                                                                                                                                      |
| amnioserosa;                                  | FBgn0046687 Tre1 CG3171 RE07751<br>FBgn0045064 bwa CG13969 RE26924                                                                                                                                                                                                                                                                                                                                                                                                                                                                                                                                                                                                   |
| trunk mesoderm primordium;                    | NULL NULL NULL LD14406<br>FBgn0037707 RnpS1 CG16788 LD23870<br>FBgn0039537 CG5590 CG5590 GH01709<br>FBgn0003862 trx CG8651 LD39445<br>FBgn0052066 CG32066 CG32066 GH09096<br>FBgn0037207 CG11100 CG11100 SD09884<br>FBgn0031493 CG3605 CG3605 LD45152<br>FBgn0035205 CG2469 CG2469 LD24034<br>FBgn0052956 CG32956 CG32956 RE06926<br>FBgn0032847 Taf18 CG10756 RE56212<br>FBgn0011638 La CG10922 RE69138<br>FBgn0011715 Snr1 CG1064 GH08712<br>FBgn0051365 CG31365 CG31365 LD28458<br>FBgn0000611 exd CG8933 LD03509<br>FBgn0003346 Sd CG9999 LD16356<br>FBgn0038476 CG5175 CG5175 LD09231<br>FBgn0038222 CG3307 CG3307 LD12042<br>FBgn0032919 CG9253 CG9253 RE27528 |
| pole plasm;                                   | FBgn0046687 Tre1 CG3171 RE07751                                                                                                                                                                                                                                                                                                                                                                                                                                                                                                                                                                                                                                      |
| ventral ectoderm primordium;                  | FBgn0036494 Toll-6 CG7250 LD08841<br>FBgn0003520 stau CG5753 LD13210<br>FBgn0031493 CG3605 CG3605 LD45152<br>FBgn0015903 apt CG5393 LD45581<br>FBgn0040230 dbo CG6224 RE13447<br>FBgn0011638 La CG10922 RE69138<br>FBgn0015396 jumu CG4029 LD24749<br>FBgn0032130 CG3838 CG3838 LD21447<br>FBgn0015903 apt CG5393 LD45581<br>FBgn0000611 exd CG8933 LD03509<br>FBgn0003346 Sd CG9999 LD16356<br>FBgn0027620 Acf1 CG1966 LD09043<br>FBgn0045064 bwa CG13969 RE26924<br>FBgn0030507 CG11164 CG11164 RE50056                                                                                                                                                            |
| visual anlage;                                | FBgn0015903 apt CG5393 LD45581<br>FBgn0000611 exd CG8933 LD03509<br>FBgn0003346 Sd CG9999 LD16356                                                                                                                                                                                                                                                                                                                                                                                                                                                                                                                                                                    |
| <i>continued on next page...</i>              |                                                                                                                                                                                                                                                                                                                                                                                                                                                                                                                                                                                                                                                                      |

| <i>Table 14 continued from previous page.</i>  |                                                                                                                                                                                                                                                                                                                                                                                                                                                                                                                                      |
|------------------------------------------------|--------------------------------------------------------------------------------------------------------------------------------------------------------------------------------------------------------------------------------------------------------------------------------------------------------------------------------------------------------------------------------------------------------------------------------------------------------------------------------------------------------------------------------------|
| Anatomical Structures                          | Genes                                                                                                                                                                                                                                                                                                                                                                                                                                                                                                                                |
| procephalic ectoderm anlage in statu nascendi; | FBgn0036494 Toll-6 CG7250 LD08841<br>FBgn0040230 dbo CG6224 RE13447<br>FBgn0046687 Tre1 CG3171 RE07751                                                                                                                                                                                                                                                                                                                                                                                                                               |
| ectoderm anlage in statu nascendi;             | FBgn0036494 Toll-6 CG7250 LD08841<br>FBgn0040230 dbo CG6224 RE13447<br>FBgn0003346 Sd CG9999 LD16356<br>FBgn0045064 bwa CG13969 RE26924                                                                                                                                                                                                                                                                                                                                                                                              |
| inclusive hindgut primordium;                  | NULL NULL NULL LD14406<br>FBgn0037707 RnpS1 CG16788 LD23870<br>FBgn0011760 ctp CG6998 LD24056<br>FBgn0029629 CG8636 CG8636 LD24347<br>FBgn0004868 Gdi CG4422 LD46767<br>FBgn0053097 CG33097 CG33097 GH12404<br>FBgn0031493 CG3605 CG3605 LD45152<br>FBgn0015903 apt CG5393 LD45581<br>FBgn0040230 dbo CG6224 RE13447<br>FBgn0011638 La CG10922 RE69138<br>FBgn0022720 zf30C CG3998 LD23102<br>FBgn0015903 apt CG5393 LD45581<br>FBgn0000611 exd CG8933 LD03509<br>FBgn0038192 CG9924 CG9924 GM07940<br>FBgn0003346 Sd CG9999 LD16356 |
| foregut anlage;                                | FBgn0037707 RnpS1 CG16788 LD23870<br>FBgn0002932 neur CG11988 LD45505<br>FBgn0015903 apt CG5393 LD45581<br>FBgn0000611 exd CG8933 LD03509<br>FBgn0003346 Sd CG9999 LD16356                                                                                                                                                                                                                                                                                                                                                           |
| dorsal ectoderm anlage in statu nascendi;      | FBgn0000611 exd CG8933 LD03509<br>FBgn0003346 Sd CG9999 LD16356                                                                                                                                                                                                                                                                                                                                                                                                                                                                      |
| cellular blastoderm;                           | FBgn0037878 CG6693 CG6693 LD05521<br>NULL NULL NULL LD14406<br>FBgn0004378 Klp61F CG9191 LD15641<br>FBgn0010342 Map60 CG1825 LD02709<br>FBgn0036518 RhoGAP71E CG32149 LD04071<br>FBgn0027783 SMC2 CG10212 LD05471<br>FBgn0024332 Mcm3 CG4206 LD07144<br>FBgn0036494 Toll-6 CG7250 LD08841<br>FBgn0003346 Sd CG9999 LD16356<br>FBgn0003520 stau CG5753 LD13210<br>FBgn0020255 ran CG1404 GM14354                                                                                                                                      |

*continued on next page...*

| <i>Table 14 continued from previous page.</i> |                                     |
|-----------------------------------------------|-------------------------------------|
| Anatomical Structures                         | Genes                               |
|                                               | FBgn0010226 GstS1 CG8938 LD21131    |
|                                               | FBgn0037707 RnpS1 CG16788 LD23870   |
|                                               | FBgn0011760 ctp CG6998 LD24056      |
|                                               | FBgn0029629 CG8636 CG8636 LD24347   |
|                                               | FBgn0039537 CG5590 CG5590 GH01709   |
|                                               | FBgn0003862 trx CG8651 LD39445      |
|                                               | FBgn0028554 xl6 CG10203 LD46359     |
|                                               | FBgn0004868 Gdi CG4422 LD46767      |
|                                               | FBgn0039250 CG11120 CG11120 LD43724 |
|                                               | FBgn0002932 neur CG11988 LD45505    |
|                                               | FBgn0039338 XNP CG4548 SD07188      |
|                                               | FBgn0052066 CG32066 CG32066 GH09096 |
|                                               | FBgn0037207 CG11100 CG11100 SD09884 |
|                                               | FBgn0053097 CG33097 CG33097 GH12404 |
|                                               | FBgn0031493 CG3605 CG3605 LD45152   |
|                                               | FBgn0015903 apt CG5393 LD45581      |
|                                               | FBgn0030468 CG1622 CG1622 GM12605   |
|                                               | FBgn0040271 Sulf1 CG6725 SD04414    |
|                                               | FBgn0035205 CG2469 CG2469 LD24034   |
|                                               | FBgn0027948 msps CG5000 GH18634     |
|                                               | FBgn0052956 CG32956 CG32956 RE06926 |
|                                               | FBgn0040230 dbo CG6224 RE13447      |
|                                               | FBgn0036973 CG5585 CG5585 RE17089   |
|                                               | FBgn0001086 fzy CG4274 RE29723      |
|                                               | FBgn0013347 TflIA-S CG5163 RE44302  |
|                                               | FBgn0033749 achintya CG8819 RE51781 |
|                                               | FBgn0032847 Taf18 CG10756 RE56212   |
|                                               | FBgn0011638 La CG10922 RE69138      |
|                                               | FBgn0017550 Rga CG2161 GM14102      |
|                                               | FBgn0015396 jumu CG4029 LD24749     |
|                                               | FBgn0011715 Snr1 CG1064 GH08712     |
|                                               | FBgn0022720 zf30C CG3998 LD23102    |
|                                               | FBgn0019637 Atu CG1433 LD30655      |
|                                               | FBgn0039350 CG17383 CG17383 LD33329 |
|                                               | FBgn0032130 CG3838 CG3838 LD21447   |
|                                               | FBgn0051365 CG31365 CG31365 LD28458 |
|                                               | FBgn0015903 apt CG5393 LD45581      |
|                                               | FBgn0011766 E2f CG6376 GH16721      |
|                                               | FBgn0005642 wdn CG1454 LD40824      |
|                                               | FBgn0039211 CG13620 CG13620 SD03914 |
|                                               | FBgn0015930 dpld CG1624 LD39167     |
|                                               | FBgn0000611 exd CG8933 LD03509      |
|                                               | FBgn0029903 CG4532 CG4532 LD08951   |
|                                               | FBgn0038192 CG9924 CG9924 GM07940   |
|                                               | FBgn0029867 CG3847 CG3847 GM08802   |
|                                               | FBgn0003346 Sd CG9999 LD16356       |

*continued on next page...*

| <i>Table 14 continued from previous page.</i> |                                     |
|-----------------------------------------------|-------------------------------------|
| Anatomical Structures                         | Genes                               |
| hindgut anlage;                               | FBgn0027620 Acf1 CG1966 LD09043     |
|                                               | FBgn0038476 CG5175 CG5175 LD09231   |
|                                               | FBgn0037066 CG7752 CG7752 LD15904   |
|                                               | FBgn0010300 brat CG10719 LD16270    |
|                                               | FBgn0038222 CG3307 CG3307 LD12042   |
|                                               | FBgn0052434 CG32434 CG32434 RE02556 |
|                                               | FBgn0038118 NULL CG7855 RE03551     |
|                                               | FBgn0046687 Tre1 CG3171 RE07751     |
|                                               | FBgn0031878 CG9188 CG9188 RE16905   |
|                                               | FBgn0045064 bwa CG13969 RE26924     |
|                                               | FBgn0032919 CG9253 CG9253 RE27528   |
|                                               | FBgn0029798 CG4078 CG4078 RE31401   |
|                                               | FBgn0030507 CG11164 CG11164 RE50056 |
|                                               | FBgn0037770 CG5358 CG5358 RE68504   |
|                                               | FBgn0029512 Aos1 CG12276 LD33652    |
| anterior endoderm primordium;                 | FBgn0037707 RnpS1 CG16788 LD23870   |
|                                               | FBgn0011760 ctp CG6998 LD24056      |
|                                               | FBgn0029629 CG8636 CG8636 LD24347   |
|                                               | FBgn0053097 CG33097 CG33097 GH12404 |
|                                               | FBgn0031493 CG3605 CG3605 LD45152   |
|                                               | FBgn0015903 apt CG5393 LD45581      |
|                                               | FBgn0040230 dbo CG6224 RE13447      |
|                                               | FBgn0011638 La CG10922 RE69138      |
|                                               | FBgn0015903 apt CG5393 LD45581      |
|                                               | FBgn0000611 exd CG8933 LD03509      |
|                                               | FBgn0038192 CG9924 CG9924 GM07940   |
|                                               | FBgn0003346 Sd CG9999 LD16356       |
|                                               | FBgn0037707 RnpS1 CG16788 LD23870   |
|                                               | FBgn0029629 CG8636 CG8636 LD24347   |
|                                               | FBgn0039537 CG5590 CG5590 GH01709   |
| FBgn0031493 CG3605 CG3605 LD45152             |                                     |
| FBgn0052956 CG32956 CG32956 RE06926           |                                     |
| FBgn0036973 CG5585 CG5585 RE17089             |                                     |
| FBgn0013347 TfIIA-S CG5163 RE44302            |                                     |
| FBgn0032847 Taf18 CG10756 RE56212             |                                     |
| FBgn0011638 La CG10922 RE69138                |                                     |
| FBgn0011715 Snr1 CG1064 GH08712               |                                     |
| FBgn0032130 CG3838 CG3838 LD21447             |                                     |
| FBgn0051365 CG31365 CG31365 LD28458           |                                     |
| FBgn0015903 apt CG5393 LD45581                |                                     |
| FBgn0000611 exd CG8933 LD03509                |                                     |
| FBgn0003346 Sd CG9999 LD16356                 |                                     |
| FBgn0032919 CG9253 CG9253 RE27528             |                                     |
| head mesoderm P2 primordium;                  |                                     |

*continued on next page...*

| <i>Table 14 continued from previous page.</i> |                                     |
|-----------------------------------------------|-------------------------------------|
| Anatomical Structures                         | Genes                               |
| posterior endoderm primordium;                | FBgn0039537 CG5590 CG5590 GH01709   |
|                                               | FBgn0037207 CG11100 CG11100 SD09884 |
|                                               | FBgn0032847 Taf18 CG10756 RE56212   |
|                                               | FBgn0011638 La CG10922 RE69138      |
|                                               | FBgn0051365 CG31365 CG31365 LD28458 |
|                                               | FBgn0000611 exd CG8933 LD03509      |
|                                               | FBgn0003346 Sd CG9999 LD16356       |
|                                               | FBgn0038222 CG3307 CG3307 LD12042   |
|                                               | FBgn0032919 CG9253 CG9253 RE27528   |
|                                               | FBgn0010226 GstS1 CG8938 LD21131    |
|                                               | FBgn0037707 RnpS1 CG16788 LD23870   |
|                                               | FBgn0029629 CG8636 CG8636 LD24347   |
|                                               | FBgn0039537 CG5590 CG5590 GH01709   |
|                                               | FBgn0039338 XNP CG4548 SD07188      |
|                                               | FBgn0031493 CG3605 CG3605 LD45152   |
|                                               | FBgn0052956 CG32956 CG32956 RE06926 |
| FBgn0036973 CG5585 CG5585 RE17089             |                                     |
| FBgn0013347 TfiIA-S CG5163 RE44302            |                                     |
| FBgn0032847 Taf18 CG10756 RE56212             |                                     |
| FBgn0011638 La CG10922 RE69138                |                                     |
| FBgn0011715 Snr1 CG1064 GH08712               |                                     |
| FBgn0032130 CG3838 CG3838 LD21447             |                                     |
| FBgn0051365 CG31365 CG31365 LD28458           |                                     |
| FBgn0015903 apt CG5393 LD45581                |                                     |
| FBgn0000611 exd CG8933 LD03509                |                                     |
| FBgn0029903 CG4532 CG4532 LD08951             |                                     |
| FBgn0003346 Sd CG9999 LD16356                 |                                     |
| FBgn0032919 CG9253 CG9253 RE27528             |                                     |
| ventral ectoderm anlage in statu nascendi;    | FBgn0040230 dbo CG6224 RE13447      |
|                                               | FBgn0000611 exd CG8933 LD03509      |
|                                               | FBgn0003346 Sd CG9999 LD16356       |
|                                               | FBgn0045064 bwa CG13969 RE26924     |
