# Supplementary material
Source: PubMed Central journal article supplement (PMC1933477)
Supplement: pcbi.0030144.st015.pdf [file pcbi.0030144.st015.pdf]

Table 15: **Diversity of anatomical annotations of genes comprising functional unit tma2smusclep**: somatic muscle primordium && trunk mesoderm primordium && trunk mesoderm anlage

| Anatomical Structures                | Genes                                                                                                                                                                                                                                                                                                                                                                                                                                                                                                                                                                                               |
|--------------------------------------|-----------------------------------------------------------------------------------------------------------------------------------------------------------------------------------------------------------------------------------------------------------------------------------------------------------------------------------------------------------------------------------------------------------------------------------------------------------------------------------------------------------------------------------------------------------------------------------------------------|
| ventral ectoderm anlage;             | FBgn0031035 NULL NULL LP04958<br>FBgn0039537 CG5590 CG5590 GH01709<br>FBgn0031745 CG8965 CG8965 GH01721<br>FBgn0033992 CG11798 CG11798 LD23883<br>FBgn0000577 en CG9015 LD16125<br>FBgn0000492 Dr CG1897 LD04235<br>FBgn0031516 CG9663 CG9663 GH24286<br>FBgn0000577 en CG9015 LD16125                                                                                                                                                                                                                                                                                                              |
| embryonic optic lobe primordium;     | FBgn0033992 CG11798 CG11798 LD23883                                                                                                                                                                                                                                                                                                                                                                                                                                                                                                                                                                 |
| midline primordium;                  | FBgn0000577 en CG9015 LD16125<br>FBgn0000577 en CG9015 LD16125                                                                                                                                                                                                                                                                                                                                                                                                                                                                                                                                      |
| hindgut proper primordium;           | FBgn0037707 RnpS1 CG16788 LD23870<br>FBgn0031035 NULL NULL LP04958<br>FBgn0031745 CG8965 CG8965 GH01721<br>FBgn0038178 CG9322 CG9322 GH13441<br>FBgn0038146 CG9799 CG9799 SD06427<br>FBgn0000577 en CG9015 LD16125<br>FBgn0052920 CG32920 CG32920 RE19605<br>FBgn0010926 l(3)07882 CG5824 LD15947<br>FBgn0000577 en CG9015 LD16125                                                                                                                                                                                                                                                                  |
| fat body/gonad primordium;           | FBgn0040297 NHE2 CG9256 RE21674                                                                                                                                                                                                                                                                                                                                                                                                                                                                                                                                                                     |
| dorsal pharyngeal muscle primordium; | FBgn0010292 bys CG1430 LD14510<br>FBgn0011656 Mef2 CG1429 LD08608<br>FBgn0035600 CG4769 CG4769 GM14501<br>FBgn0001961 Sop2 CG8978 SD06579<br>FBgn0015513 mbc CG10379 SD06708<br>FBgn0003900 twi CG2956 AT15089<br>FBgn0033992 CG11798 CG11798 LD23883<br>FBgn0039039 lmd CG4677 LD47926<br>FBgn0011656 Mef2 CG1429 LD08608<br>FBgn0032168 CG13126 CG13126 RE01590<br>FBgn0052372 CG32372 CG32372 RE09158<br>FBgn0052920 CG32920 CG32920 RE19605<br>FBgn0033562 CG6751 CG6751 RE21021<br>FBgn0040297 NHE2 CG9256 RE21674<br>FBgn0031851 CG11188 CG11188 RE30678<br>FBgn0031516 CG9663 CG9663 GH24286 |
|                                      | <i>continued on next page...</i>                                                                                                                                                                                                                                                                                                                                                                                                                                                                                                                                                                    |

| <i>Table 15 continued from previous page.</i> |                                                                                                                                                                                                                                                                                                                                                                                                                                                                                                                                                                                                                                                                                   |
|-----------------------------------------------|-----------------------------------------------------------------------------------------------------------------------------------------------------------------------------------------------------------------------------------------------------------------------------------------------------------------------------------------------------------------------------------------------------------------------------------------------------------------------------------------------------------------------------------------------------------------------------------------------------------------------------------------------------------------------------------|
| Anatomical Structures                         | Genes                                                                                                                                                                                                                                                                                                                                                                                                                                                                                                                                                                                                                                                                             |
| proventriculus primordium;                    | FBgn0037707 RnpS1 CG16788 LD23870<br>FBgn0015919 caup CG10605 LP03275                                                                                                                                                                                                                                                                                                                                                                                                                                                                                                                                                                                                             |
| head mesoderm anlage;                         | FBgn0011656 Mef2 CG1429 LD08608<br>FBgn0010926 l(3)07882 CG5824 LD15947<br>FBgn0037707 RnpS1 CG16788 LD23870<br>FBgn0031035 NULL NULL LP04958<br>FBgn0013951 Mer CG14228 GH01330<br>FBgn0039537 CG5590 CG5590 GH01709<br>FBgn0015513 mbc CG10379 SD06708<br>FBgn0003900 twi CG2956 AT15089<br>FBgn0033992 CG11798 CG11798 LD23883<br>FBgn0000472 dm CG10798 LD32539<br>FBgn0038146 CG9799 CG9799 SD06427<br>FBgn0052372 CG32372 CG32372 RE09158<br>FBgn0052920 CG32920 CG32920 RE19605<br>FBgn0040297 NHE2 CG9256 RE21674<br>FBgn0031851 CG11188 CG11188 RE30678<br>FBgn0010926 l(3)07882 CG5824 LD15947<br>FBgn0027619 Adam CG12131 GH12681<br>FBgn0031516 CG9663 CG9663 GH24286 |
| procephalic ectoderm primordium;              | FBgn0037707 RnpS1 CG16788 LD23870<br>FBgn0039537 CG5590 CG5590 GH01709<br>FBgn0033992 CG11798 CG11798 LD23883<br>FBgn0000577 en CG9015 LD16125<br>FBgn0040297 NHE2 CG9256 RE21674<br>FBgn0000577 en CG9015 LD16125                                                                                                                                                                                                                                                                                                                                                                                                                                                                |
| tracheal primordium;                          | FBgn0031745 CG8965 CG8965 GH01721<br>FBgn0000472 dm CG10798 LD32539<br>FBgn0039039 lmd CG4677 LD47926                                                                                                                                                                                                                                                                                                                                                                                                                                                                                                                                                                             |
| dorsal ectoderm primordium;                   | FBgn0038178 CG9322 CG9322 GH13441<br>FBgn0033992 CG11798 CG11798 LD23883<br>FBgn0039039 lmd CG4677 LD47926                                                                                                                                                                                                                                                                                                                                                                                                                                                                                                                                                                        |
| external foregut primordium;                  | FBgn0031745 CG8965 CG8965 GH01721<br>FBgn0000577 en CG9015 LD16125<br>FBgn0000492 Dr CG1897 LD04235<br>FBgn0033562 CG6751 CG6751 RE21021<br>FBgn0000577 en CG9015 LD16125                                                                                                                                                                                                                                                                                                                                                                                                                                                                                                         |
| longitudinal visceral mesoderm primordium;    | FBgn0036298 CG10627 CG10627 LD02044<br>FBgn0011656 Mef2 CG1429 LD08608                                                                                                                                                                                                                                                                                                                                                                                                                                                                                                                                                                                                            |

*continued on next page...*

*Table 15 continued from previous page.*

| Anatomical Structures                                    | Genes                                                                                                                                                                                                                                                                                                                                   |
|----------------------------------------------------------|-----------------------------------------------------------------------------------------------------------------------------------------------------------------------------------------------------------------------------------------------------------------------------------------------------------------------------------------|
|                                                          | FBgn0015513 mbc CG10379 SD06708<br>FBgn0003900 twi CG2956 AT15089<br>FBgn0033992 CG11798 CG11798 LD23883<br>FBgn0038146 CG9799 CG9799 SD06427<br>FBgn0011656 Mef2 CG1429 LD08608<br>FBgn0033562 CG6751 CG6751 RE21021<br>FBgn0036298 CG10627 CG10627 LD02044<br>FBgn0031516 CG9663 CG9663 GH24286                                       |
| procephalic neuroblasts;<br>dorsal epidermis primordium; | FBgn0033992 CG11798 CG11798 LD23883<br><br>FBgn0038178 CG9322 CG9322 GH13441<br>FBgn0033992 CG11798 CG11798 LD23883<br>FBgn0039039 lmd CG4677 LD47926<br>FBgn0000577 en CG9015 LD16125<br>FBgn0000577 en CG9015 LD16125                                                                                                                 |
| Malpighian tubule primordium;                            | FBgn0035600 CG4769 CG4769 GM14501<br>FBgn0027619 Adam CG12131 GH12681                                                                                                                                                                                                                                                                   |
| garland cell primordium;                                 | FBgn0040297 NHE2 CG9256 RE21674                                                                                                                                                                                                                                                                                                         |
| salivary gland body primordium;                          | FBgn0000472 dm CG10798 LD32539<br>FBgn0038146 CG9799 CG9799 SD06427<br>FBgn0000492 Dr CG1897 LD04235<br>FBgn0033562 CG6751 CG6751 RE21021<br>FBgn0031851 CG11188 CG11188 RE30678<br>FBgn0036298 CG10627 CG10627 LD02044<br>FBgn0027619 Adam CG12131 GH12681                                                                             |
| ventral neuroderm anlage;                                | FBgn0037707 RnpS1 CG16788 LD23870<br>FBgn0031745 CG8965 CG8965 GH01721<br>FBgn0033992 CG11798 CG11798 LD23883<br>FBgn0000577 en CG9015 LD16125<br>FBgn0000492 Dr CG1897 LD04235<br>FBgn0000577 en CG9015 LD16125                                                                                                                        |
| trunk mesoderm anlage;                                   | FBgn0010292 bys CG1430 LD14510<br>FBgn0036298 CG10627 CG10627 LD02044<br>FBgn0011656 Mef2 CG1429 LD08608<br>FBgn0010926 l(3)07882 CG5824 LD15947<br>FBgn0035600 CG4769 CG4769 GM14501<br>FBgn0037707 RnpS1 CG16788 LD23870<br>FBgn0031035 NULL NULL LP04958<br>FBgn0029715 CG11444 CG11444 GM14292<br>FBgn0038585 CG7993 CG7993 GH01229 |

*continued on next page...*

| <i>Table 15 continued from previous page.</i> |                                      |
|-----------------------------------------------|--------------------------------------|
| Anatomical Structures                         | Genes                                |
|                                               | FBgn0013951 Mer CG14228 GH01330      |
|                                               | FBgn0039537 CG5590 CG5590 GH01709    |
|                                               | FBgn0031745 CG8965 CG8965 GH01721    |
|                                               | FBgn0001961 Sop2 CG8978 SD06579      |
|                                               | FBgn0038178 CG9322 CG9322 GH13441    |
|                                               | FBgn0015513 mbc CG10379 SD06708      |
|                                               | FBgn0003900 twi CG2956 AT15089       |
|                                               | FBgn0015919 caup CG10605 LP03275     |
|                                               | FBgn0033992 CG11798 CG11798 LD23883  |
|                                               | FBgn0000472 dm CG10798 LD32539       |
|                                               | FBgn0039039 lmd CG4677 LD47926       |
|                                               | FBgn0038146 CG9799 CG9799 SD06427    |
|                                               | FBgn0000577 en CG9015 LD16125        |
|                                               | FBgn0000492 Dr CG1897 LD04235        |
|                                               | FBgn0011656 Mef2 CG1429 LD08608      |
|                                               | FBgn0032168 CG13126 CG13126 RE01590  |
|                                               | FBgn0052372 CG32372 CG32372 RE09158  |
|                                               | FBgn0052920 CG32920 CG32920 RE19605  |
|                                               | FBgn0033562 CG6751 CG6751 RE21021    |
|                                               | FBgn0040297 NHE2 CG9256 RE21674      |
|                                               | FBgn0031851 CG11188 CG11188 RE30678  |
|                                               | FBgn0036298 CG10627 CG10627 LD02044  |
|                                               | FBgn0010926 l(3)07882 CG5824 LD15947 |
|                                               | FBgn0027619 Adam CG12131 GH12681     |
|                                               | FBgn0031516 CG9663 CG9663 GH24286    |
|                                               | FBgn0000577 en CG9015 LD16125        |
| anterior endoderm anlage;                     | FBgn0010926 l(3)07882 CG5824 LD15947 |
|                                               | FBgn0037707 RnpS1 CG16788 LD23870    |
|                                               | FBgn0031035 NULL NULL LP04958        |
|                                               | FBgn0029715 CG11444 CG11444 GM14292  |
|                                               | FBgn0038585 CG7993 CG7993 GH01229    |
|                                               | FBgn0039537 CG5590 CG5590 GH01709    |
|                                               | FBgn0015513 mbc CG10379 SD06708      |
|                                               | FBgn0003900 twi CG2956 AT15089       |
|                                               | FBgn0000472 dm CG10798 LD32539       |
|                                               | FBgn0038146 CG9799 CG9799 SD06427    |
|                                               | FBgn0052372 CG32372 CG32372 RE09158  |
|                                               | FBgn0052920 CG32920 CG32920 RE19605  |
|                                               | FBgn0031851 CG11188 CG11188 RE30678  |
|                                               | FBgn0010926 l(3)07882 CG5824 LD15947 |
|                                               | FBgn0027619 Adam CG12131 GH12681     |
| need new term(larval eye primordium);         | FBgn0033992 CG11798 CG11798 LD23883  |
| ventral nerve cord primordium;                | FBgn0037707 RnpS1 CG16788 LD23870    |

*continued on next page...*

| <i>Table 15 continued from previous page.</i>      |                                                                                                                                                                                                                                                                                                                                                                                                                                                                                                 |
|----------------------------------------------------|-------------------------------------------------------------------------------------------------------------------------------------------------------------------------------------------------------------------------------------------------------------------------------------------------------------------------------------------------------------------------------------------------------------------------------------------------------------------------------------------------|
| Anatomical Structures                              | Genes                                                                                                                                                                                                                                                                                                                                                                                                                                                                                           |
| visual primordium;<br>procephalic ectoderm anlage; | FBgn0039537 CG5590 CG5590 GH01709<br>FBgn0031745 CG8965 CG8965 GH01721<br>FBgn0033992 CG11798 CG11798 LD23883<br>FBgn0000577 en CG9015 LD16125<br>FBgn0000492 Dr CG1897 LD04235<br>FBgn0040297 NHE2 CG9256 RE21674<br>FBgn0000577 en CG9015 LD16125                                                                                                                                                                                                                                             |
|                                                    | FBgn0033992 CG11798 CG11798 LD23883                                                                                                                                                                                                                                                                                                                                                                                                                                                             |
|                                                    | FBgn0036298 CG10627 CG10627 LD02044<br>FBgn0037707 RnpS1 CG16788 LD23870<br>FBgn0031035 NULL NULL LP04958<br>FBgn0033992 CG11798 CG11798 LD23883<br>FBgn0038146 CG9799 CG9799 SD06427<br>FBgn0000577 en CG9015 LD16125<br>FBgn0036298 CG10627 CG10627 LD02044<br>FBgn0000577 en CG9015 LD16125                                                                                                                                                                                                  |
|                                                    | dorsal ectoderm anlage;                                                                                                                                                                                                                                                                                                                                                                                                                                                                         |
|                                                    | FBgn0033992 CG11798 CG11798 LD23883<br>FBgn0000577 en CG9015 LD16125<br>FBgn0000577 en CG9015 LD16125                                                                                                                                                                                                                                                                                                                                                                                           |
|                                                    | mesectoderm primordium;                                                                                                                                                                                                                                                                                                                                                                                                                                                                         |
|                                                    | FBgn0031745 CG8965 CG8965 GH01721<br>FBgn0033992 CG11798 CG11798 LD23883<br>FBgn0000577 en CG9015 LD16125<br>FBgn0000577 en CG9015 LD16125                                                                                                                                                                                                                                                                                                                                                      |
|                                                    | foregut primordium;                                                                                                                                                                                                                                                                                                                                                                                                                                                                             |
|                                                    | FBgn0031745 CG8965 CG8965 GH01721<br>FBgn0033562 CG6751 CG6751 RE21021                                                                                                                                                                                                                                                                                                                                                                                                                          |
|                                                    | posterior endoderm anlage;                                                                                                                                                                                                                                                                                                                                                                                                                                                                      |
| anal pad specific anlage;                          | FBgn0010926 l(3)07882 CG5824 LD15947<br>FBgn0037707 RnpS1 CG16788 LD23870<br>FBgn0031035 NULL NULL LP04958<br>FBgn0029715 CG11444 CG11444 GM14292<br>FBgn0038585 CG7993 CG7993 GH01229<br>FBgn0039537 CG5590 CG5590 GH01709<br>FBgn0015513 mbc CG10379 SD06708<br>FBgn0000472 dm CG10798 LD32539<br>FBgn0038146 CG9799 CG9799 SD06427<br>FBgn0052920 CG32920 CG32920 RE19605<br>FBgn0031851 CG11188 CG11188 RE30678<br>FBgn0010926 l(3)07882 CG5824 LD15947<br>FBgn0027619 Adam CG12131 GH12681 |
|                                                    | FBgn0035600 CG4769 CG4769 GM14501                                                                                                                                                                                                                                                                                                                                                                                                                                                               |

*continued on next page...*

| <i>Table 15 continued from previous page.</i> |                                      |
|-----------------------------------------------|--------------------------------------|
| Anatomical Structures                         | Genes                                |
| mesectoderm anlage;                           | FBgn0010926 l(3)07882 CG5824 LD15947 |
|                                               | FBgn0037707 RnpS1 CG16788 LD23870    |
|                                               | FBgn0031745 CG8965 CG8965 GH01721    |
|                                               | FBgn0033992 CG11798 CG11798 LD23883  |
|                                               | FBgn0000577 en CG9015 LD16125        |
|                                               | FBgn0000577 en CG9015 LD16125        |
| visceral muscle primordium;                   |                                      |
|                                               | FBgn0011656 Mef2 CG1429 LD08608      |
|                                               | FBgn0010926 l(3)07882 CG5824 LD15947 |
|                                               | FBgn0037707 RnpS1 CG16788 LD23870    |
|                                               | FBgn0031745 CG8965 CG8965 GH01721    |
|                                               | FBgn0038178 CG9322 CG9322 GH13441    |
|                                               | FBgn0033992 CG11798 CG11798 LD23883  |
|                                               | FBgn0011656 Mef2 CG1429 LD08608      |
|                                               | FBgn0033562 CG6751 CG6751 RE21021    |
|                                               | FBgn0010926 l(3)07882 CG5824 LD15947 |
|                                               | FBgn0031516 CG9663 CG9663 GH24286    |
| salivary gland body specific anlage;          |                                      |
| trunk mesoderm primordium;                    | FBgn0000472 dm CG10798 LD32539       |
|                                               | FBgn0010292 bys CG1430 LD14510       |
|                                               | FBgn0036298 CG10627 CG10627 LD02044  |
|                                               | FBgn0011656 Mef2 CG1429 LD08608      |
|                                               | FBgn0010926 l(3)07882 CG5824 LD15947 |
|                                               | FBgn0035600 CG4769 CG4769 GM14501    |
|                                               | FBgn0037707 RnpS1 CG16788 LD23870    |
|                                               | FBgn0031035 NULL NULL LP04958        |
|                                               | FBgn0029715 CG11444 CG11444 GM14292  |
|                                               | FBgn0038585 CG7993 CG7993 GH01229    |
|                                               | FBgn0013951 Mer CG14228 GH01330      |
|                                               | FBgn0039537 CG5590 CG5590 GH01709    |
|                                               | FBgn0031745 CG8965 CG8965 GH01721    |
|                                               | FBgn0001961 Sop2 CG8978 SD06579      |
|                                               | FBgn0038178 CG9322 CG9322 GH13441    |
|                                               | FBgn0015513 mbc CG10379 SD06708      |
|                                               | FBgn0003900 twi CG2956 AT15089       |
|                                               | FBgn0015919 caup CG10605 LP03275     |
|                                               | FBgn0033992 CG11798 CG11798 LD23883  |
|                                               | FBgn0000472 dm CG10798 LD32539       |
|                                               | FBgn0039039 lmd CG4677 LD47926       |
|                                               | FBgn0038146 CG9799 CG9799 SD06427    |
|                                               | FBgn0000577 en CG9015 LD16125        |
|                                               | FBgn0000492 Dr CG1897 LD04235        |
|                                               | FBgn0011656 Mef2 CG1429 LD08608      |
|                                               | FBgn0032168 CG13126 CG13126 RE01590  |

*continued on next page...*

*Table 15 continued from previous page.*

| Anatomical Structures                  | Genes                                |
|----------------------------------------|--------------------------------------|
| protocerebrum primordium;              | FBgn0052372 CG32372 CG32372 RE09158  |
|                                        | FBgn0052920 CG32920 CG32920 RE19605  |
|                                        | FBgn0033562 CG6751 CG6751 RE21021    |
|                                        | FBgn0040297 NHE2 CG9256 RE21674      |
|                                        | FBgn0031851 CG11188 CG11188 RE30678  |
|                                        | FBgn0036298 CG10627 CG10627 LD02044  |
|                                        | FBgn0010926 l(3)07882 CG5824 LD15947 |
|                                        | FBgn0027619 Adam CG12131 GH12681     |
|                                        | FBgn0031516 CG9663 CG9663 GH24286    |
|                                        | FBgn0000577 en CG9015 LD16125        |
| ventral epidermis primordium;          | FBgn0037707 RnpS1 CG16788 LD23870    |
|                                        | FBgn0033992 CG11798 CG11798 LD23883  |
|                                        | FBgn0000577 en CG9015 LD16125        |
|                                        | FBgn0040297 NHE2 CG9256 RE21674      |
| ventral ectoderm primordium;           | FBgn0000577 en CG9015 LD16125        |
|                                        | FBgn0038178 CG9322 CG9322 GH13441    |
|                                        | FBgn0033992 CG11798 CG11798 LD23883  |
|                                        | FBgn0000577 en CG9015 LD16125        |
|                                        | FBgn0000492 Dr CG1897 LD04235        |
| visual anlage;                         | FBgn0000577 en CG9015 LD16125        |
|                                        | FBgn0038178 CG9322 CG9322 GH13441    |
|                                        | FBgn0033992 CG11798 CG11798 LD23883  |
|                                        | FBgn0039039 lmd CG4677 LD47926       |
|                                        | FBgn0000577 en CG9015 LD16125        |
|                                        | FBgn0000492 Dr CG1897 LD04235        |
| neuroblasts of ventral nervous system; | FBgn0000577 en CG9015 LD16125        |
|                                        | FBgn0033992 CG11798 CG11798 LD23883  |
| inclusive hindgut primordium;          | FBgn0033992 CG11798 CG11798 LD23883  |
|                                        | FBgn0040297 NHE2 CG9256 RE21674      |
|                                        | FBgn0036298 CG10627 CG10627 LD02044  |
|                                        | FBgn0035600 CG4769 CG4769 GM14501    |
|                                        | FBgn0037707 RnpS1 CG16788 LD23870    |
|                                        | FBgn0031035 NULL NULL LP04958        |
|                                        | FBgn0038585 CG7993 CG7993 GH01229    |
|                                        | FBgn0031745 CG8965 CG8965 GH01721    |
|                                        | FBgn0038178 CG9322 CG9322 GH13441    |
|                                        | FBgn0038146 CG9799 CG9799 SD06427    |
|                                        | FBgn0000577 en CG9015 LD16125        |
|                                        | FBgn0052920 CG32920 CG32920 RE19605  |
|                                        | FBgn0033562 CG6751 CG6751 RE21021    |

*continued on next page...*

| <i>Table 15 continued from previous page.</i> |                                      |
|-----------------------------------------------|--------------------------------------|
| Anatomical Structures                         | Genes                                |
| somatic muscle primordium;                    | FBgn0036298 CG10627 CG10627 LD02044  |
|                                               | FBgn0027619 Adam CG12131 GH12681     |
|                                               | FBgn0000577 en CG9015 LD16125        |
|                                               | FBgn0010292 bys CG1430 LD14510       |
|                                               | FBgn0036298 CG10627 CG10627 LD02044  |
|                                               | FBgn0011656 Mef2 CG1429 LD08608      |
|                                               | FBgn0010926 l(3)07882 CG5824 LD15947 |
|                                               | FBgn0035600 CG4769 CG4769 GM14501    |
|                                               | FBgn0037707 RnpS1 CG16788 LD23870    |
|                                               | FBgn0031035 NULL NULL LP04958        |
|                                               | FBgn0029715 CG11444 CG11444 GM14292  |
|                                               | FBgn0038585 CG7993 CG7993 GH01229    |
|                                               | FBgn0013951 Mer CG14228 GH01330      |
|                                               | FBgn0039537 CG5590 CG5590 GH01709    |
|                                               | FBgn0031745 CG8965 CG8965 GH01721    |
|                                               | FBgn0001961 Sop2 CG8978 SD06579      |
|                                               | FBgn0038178 CG9322 CG9322 GH13441    |
|                                               | FBgn0015513 mbc CG10379 SD06708      |
|                                               | FBgn0003900 twi CG2956 AT15089       |
|                                               | FBgn0015919 caup CG10605 LP03275     |
|                                               | FBgn0033992 CG11798 CG11798 LD23883  |
|                                               | FBgn0000472 dm CG10798 LD32539       |
|                                               | FBgn0039039 lmd CG4677 LD47926       |
|                                               | FBgn0038146 CG9799 CG9799 SD06427    |
|                                               | FBgn0000577 en CG9015 LD16125        |
|                                               | FBgn0000492 Dr CG1897 LD04235        |
|                                               | FBgn0011656 Mef2 CG1429 LD08608      |
| FBgn0032168 CG13126 CG13126 RE01590           |                                      |
| FBgn0052372 CG32372 CG32372 RE09158           |                                      |
| FBgn0052920 CG32920 CG32920 RE19605           |                                      |
| FBgn0033562 CG6751 CG6751 RE21021             |                                      |
| FBgn0040297 NHE2 CG9256 RE21674               |                                      |
| FBgn0031851 CG11188 CG11188 RE30678           |                                      |
| FBgn0036298 CG10627 CG10627 LD02044           |                                      |
| FBgn0010926 l(3)07882 CG5824 LD15947          |                                      |
| FBgn0027619 Adam CG12131 GH12681              |                                      |
| FBgn0031516 CG9663 CG9663 GH24286             |                                      |
| FBgn0000577 en CG9015 LD16125                 |                                      |
| foregut anlage;                               | FBgn0037707 RnpS1 CG16788 LD23870    |
| gnathal primordium;                           | FBgn0033562 CG6751 CG6751 RE21021    |
|                                               | FBgn0000577 en CG9015 LD16125        |
|                                               | FBgn0000492 Dr CG1897 LD04235        |
|                                               | FBgn0000577 en CG9015 LD16125        |

*continued on next page...*



| <i>Table 15 continued from previous page.</i> |                                                                                                                                                                                                                                                                                                                                                                                                                                                                                                                                                                                                                                                        |
|-----------------------------------------------|--------------------------------------------------------------------------------------------------------------------------------------------------------------------------------------------------------------------------------------------------------------------------------------------------------------------------------------------------------------------------------------------------------------------------------------------------------------------------------------------------------------------------------------------------------------------------------------------------------------------------------------------------------|
| Anatomical Structures                         | Genes                                                                                                                                                                                                                                                                                                                                                                                                                                                                                                                                                                                                                                                  |
| hindgut anlage;                               | FBgn0036298 CG10627 CG10627 LD02044<br>FBgn0035600 CG4769 CG4769 GM14501<br>FBgn0037707 RnpS1 CG16788 LD23870<br>FBgn0031035 NULL NULL LP04958<br>FBgn0038585 CG7993 CG7993 GH01229<br>FBgn0031745 CG8965 CG8965 GH01721<br>FBgn0038178 CG9322 CG9322 GH13441<br>FBgn0038146 CG9799 CG9799 SD06427<br>FBgn0000577 en CG9015 LD16125<br>FBgn0033562 CG6751 CG6751 RE21021<br>FBgn0036298 CG10627 CG10627 LD02044<br>FBgn0000577 en CG9015 LD16125                                                                                                                                                                                                       |
| stomatogastric nervous system primordium;     | FBgn0031745 CG8965 CG8965 GH01721<br>FBgn0000492 Dr CG1897 LD04235                                                                                                                                                                                                                                                                                                                                                                                                                                                                                                                                                                                     |
| clypeo-labral primordium;                     | FBgn0000577 en CG9015 LD16125<br>FBgn0000577 en CG9015 LD16125                                                                                                                                                                                                                                                                                                                                                                                                                                                                                                                                                                                         |
| anterior midgut primordium;                   | FBgn0010292 bys CG1430 LD14510<br>FBgn0010926 l(3)07882 CG5824 LD15947<br>FBgn0037707 RnpS1 CG16788 LD23870<br>FBgn0029715 CG11444 CG11444 GM14292<br>FBgn0038585 CG7993 CG7993 GH01229<br>FBgn0039537 CG5590 CG5590 GH01709<br>FBgn0015513 mbc CG10379 SD06708<br>FBgn0000472 dm CG10798 LD32539<br>FBgn0038146 CG9799 CG9799 SD06427<br>FBgn0032168 CG13126 CG13126 RE01590<br>FBgn0052920 CG32920 CG32920 RE19605<br>FBgn0033562 CG6751 CG6751 RE21021<br>FBgn0040297 NHE2 CG9256 RE21674<br>FBgn0031851 CG11188 CG11188 RE30678<br>FBgn0036298 CG10627 CG10627 LD02044<br>FBgn0010926 l(3)07882 CG5824 LD15947<br>FBgn0027619 Adam CG12131 GH12681 |
| head mesoderm P2 primordium;                  | FBgn0010292 bys CG1430 LD14510<br>FBgn0036298 CG10627 CG10627 LD02044<br>FBgn0010926 l(3)07882 CG5824 LD15947<br>FBgn0035600 CG4769 CG4769 GM14501<br>FBgn0013951 Mer CG14228 GH01330<br>FBgn0039537 CG5590 CG5590 GH01709<br>FBgn0001961 Sop2 CG8978 SD06579<br>FBgn0038178 CG9322 CG9322 GH13441                                                                                                                                                                                                                                                                                                                                                     |

*continued on next page...*

| <i>Table 15 continued from previous page.</i> |                                      |
|-----------------------------------------------|--------------------------------------|
| Anatomical Structures                         | Genes                                |
| anterior endoderm primordium;                 | FBgn0015513 mbc CG10379 SD06708      |
|                                               | FBgn0003900 twi CG2956 AT15089       |
|                                               | FBgn0033992 CG11798 CG11798 LD23883  |
|                                               | FBgn0000472 dm CG10798 LD32539       |
|                                               | FBgn0039039 lmd CG4677 LD47926       |
|                                               | FBgn0052372 CG32372 CG32372 RE09158  |
|                                               | FBgn0052920 CG32920 CG32920 RE19605  |
|                                               | FBgn0033562 CG6751 CG6751 RE21021    |
|                                               | FBgn0040297 NHE2 CG9256 RE21674      |
|                                               | FBgn0031851 CG11188 CG11188 RE30678  |
|                                               | FBgn0036298 CG10627 CG10627 LD02044  |
|                                               | FBgn0010926 l(3)07882 CG5824 LD15947 |
|                                               | FBgn0027619 Adam CG12131 GH12681     |
|                                               | FBgn0031516 CG9663 CG9663 GH24286    |
| cardiac mesoderm primordium;                  | FBgn0010292 bys CG1430 LD14510       |
|                                               | FBgn0010926 l(3)07882 CG5824 LD15947 |
|                                               | FBgn0037707 RnpS1 CG16788 LD23870    |
|                                               | FBgn0031035 NULL NULL LP04958        |
|                                               | FBgn0029715 CG11444 CG11444 GM14292  |
|                                               | FBgn0038585 CG7993 CG7993 GH01229    |
|                                               | FBgn0039537 CG5590 CG5590 GH01709    |
|                                               | FBgn0015513 mbc CG10379 SD06708      |
|                                               | FBgn0000472 dm CG10798 LD32539       |
|                                               | FBgn0038146 CG9799 CG9799 SD06427    |
|                                               | FBgn0032168 CG13126 CG13126 RE01590  |
|                                               | FBgn0052920 CG32920 CG32920 RE19605  |
|                                               | FBgn0033562 CG6751 CG6751 RE21021    |
|                                               | FBgn0040297 NHE2 CG9256 RE21674      |
| FBgn0031851 CG11188 CG11188 RE30678           |                                      |
| FBgn0036298 CG10627 CG10627 LD02044           |                                      |
| FBgn0010926 l(3)07882 CG5824 LD15947          |                                      |
| FBgn0027619 Adam CG12131 GH12681              |                                      |
| posterior midgut primordium;                  | FBgn0033992 CG11798 CG11798 LD23883  |
|                                               | FBgn0040297 NHE2 CG9256 RE21674      |
|                                               | FBgn0010292 bys CG1430 LD14510       |
|                                               | FBgn0010926 l(3)07882 CG5824 LD15947 |
|                                               | FBgn0037707 RnpS1 CG16788 LD23870    |
|                                               | FBgn0029715 CG11444 CG11444 GM14292  |
|                                               | FBgn0038585 CG7993 CG7993 GH01229    |
|                                               | FBgn0039537 CG5590 CG5590 GH01709    |
|                                               | FBgn0015513 mbc CG10379 SD06708      |
|                                               | FBgn0000472 dm CG10798 LD32539       |
|                                               | FBgn0038146 CG9799 CG9799 SD06427    |

*continued on next page...*

| <i>Table 15 continued from previous page.</i>                                                     |                                      |
|---------------------------------------------------------------------------------------------------|--------------------------------------|
| Anatomical Structures                                                                             | Genes                                |
| embryonic ganglion mother cell;<br>lamellocyte specific anlage;<br>posterior endoderm primordium; | FBgn0032168 CG13126 CG13126 RE01590  |
|                                                                                                   | FBgn0052920 CG32920 CG32920 RE19605  |
|                                                                                                   | FBgn0033562 CG6751 CG6751 RE21021    |
|                                                                                                   | FBgn0040297 NHE2 CG9256 RE21674      |
|                                                                                                   | FBgn0031851 CG11188 CG11188 RE30678  |
|                                                                                                   | FBgn0036298 CG10627 CG10627 LD02044  |
|                                                                                                   | FBgn0010926 l(3)07882 CG5824 LD15947 |
|                                                                                                   | FBgn0027619 Adam CG12131 GH12681     |
|                                                                                                   | FBgn0040297 NHE2 CG9256 RE21674      |
|                                                                                                   | FBgn0033562 CG6751 CG6751 RE21021    |
|                                                                                                   | FBgn0040297 NHE2 CG9256 RE21674      |
|                                                                                                   | FBgn0010292 bys CG1430 LD14510       |
|                                                                                                   | FBgn0010926 l(3)07882 CG5824 LD15947 |
|                                                                                                   | FBgn0037707 RnpS1 CG16788 LD23870    |
|                                                                                                   | FBgn0031035 NULL NULL LP04958        |
| FBgn0029715 CG11444 CG11444 GM14292                                                               |                                      |
| FBgn0038585 CG7993 CG7993 GH01229                                                                 |                                      |
| FBgn0039537 CG5590 CG5590 GH01709                                                                 |                                      |
| FBgn0038178 CG9322 CG9322 GH13441                                                                 |                                      |
| FBgn0015513 mbc CG10379 SD06708                                                                   |                                      |
| FBgn0000472 dm CG10798 LD32539                                                                    |                                      |
| FBgn0032168 CG13126 CG13126 RE01590                                                               |                                      |
| FBgn0052920 CG32920 CG32920 RE19605                                                               |                                      |
| FBgn0033562 CG6751 CG6751 RE21021                                                                 |                                      |
| FBgn0040297 NHE2 CG9256 RE21674                                                                   |                                      |
| FBgn0031851 CG11188 CG11188 RE30678                                                               |                                      |
| FBgn0036298 CG10627 CG10627 LD02044                                                               |                                      |
| FBgn0010926 l(3)07882 CG5824 LD15947                                                              |                                      |
| FBgn0027619 Adam CG12131 GH12681                                                                  |                                      |
| fat body specific anlage;                                                                         | FBgn0027619 Adam CG12131 GH12681     |
