# Supplementary material
Source: PubMed Central journal article supplement (PMC1933477)
Supplement: pcbi.0030144.st016.pdf [file pcbi.0030144.st016.pdf]

Table 16: **Diversity of anatomical annotations of genes comprising functional unit vna2lcord:**  
ventral neuroderm anlage && ventral nerve cord primordium && lateral cord

| Anatomical Structures                | Genes                                                                                                                                                                                                                                                                                           |
|--------------------------------------|-------------------------------------------------------------------------------------------------------------------------------------------------------------------------------------------------------------------------------------------------------------------------------------------------|
| embryonic optic lobe primordium;     | FBgn0002932 neur CG11988 LD45505<br>FBgn0033992 CG11798 CG11798 LD23883<br>FBgn0010453 Wnt4 CG4698 RE26454                                                                                                                                                                                      |
| embryonic esophagus;                 | FBgn0031745 CG8965 CG8965 GH01721<br>FBgn0010453 Wnt4 CG4698 RE26454                                                                                                                                                                                                                            |
| dorsal pharyngeal muscle primordium; | FBgn0033992 CG11798 CG11798 LD23883                                                                                                                                                                                                                                                             |
| embryonic epipharynx;                | FBgn0031745 CG8965 CG8965 GH01721<br>FBgn0015903 apt CG5393 LD45581<br>FBgn0000577 en CG9015 LD16125<br>FBgn0010453 Wnt4 CG4698 RE26454<br>FBgn0000577 en CG9015 LD16125                                                                                                                        |
| ventral midline;                     | FBgn0031745 CG8965 CG8965 GH01721<br>FBgn0040271 Sulf1 CG6725 SD04414<br>FBgn0000577 en CG9015 LD16125<br>FBgn0000411 D CG5893 AT02631<br>FBgn0015773 NetA CG18657 RE11206<br>FBgn0010105 comm CG17943 RH64772<br>FBgn0000577 en CG9015 LD16125                                                 |
| gonad;                               | FBgn0032130 CG3838 CG3838 LD21447<br>FBgn0038434 CG14897 CG14897 RE60459<br>FBgn0029512 Aos1 CG12276 LD33652<br>FBgn0017453 Zn72D CG5215 GH12756                                                                                                                                                |
| head mesoderm anlage;                | FBgn0037707 RnpS1 CG16788 LD23870<br>FBgn0002932 neur CG11988 LD45505<br>FBgn0032130 CG3838 CG3838 LD21447<br>FBgn0033992 CG11798 CG11798 LD23883<br>FBgn0000611 exd CG8933 LD03509<br>FBgn0003346 Sd CG9999 LD16356<br>FBgn0015773 NetA CG18657 RE11206<br>FBgn0052982 CG32982 CG32982 RE11317 |
| embryonic midgut;                    | FBgn0037707 RnpS1 CG16788 LD23870<br>FBgn0000071 Ama CG2198 LD39923<br>FBgn0040271 Sulf1 CG6725 SD04414<br>FBgn0032130 CG3838 CG3838 LD21447<br>FBgn0000611 exd CG8933 LD03509                                                                                                                  |
| <i>continued on next page...</i>     |                                                                                                                                                                                                                                                                                                 |

| <i>Table 16 continued from previous page.</i> |                                                                                                                                                                                                                                                                                                                                                                                                                                                                                                                                                                                                                                                                                                                                                                                                                                                                                                                                                                                                                                             |
|-----------------------------------------------|---------------------------------------------------------------------------------------------------------------------------------------------------------------------------------------------------------------------------------------------------------------------------------------------------------------------------------------------------------------------------------------------------------------------------------------------------------------------------------------------------------------------------------------------------------------------------------------------------------------------------------------------------------------------------------------------------------------------------------------------------------------------------------------------------------------------------------------------------------------------------------------------------------------------------------------------------------------------------------------------------------------------------------------------|
| Anatomical Structures                         | Genes                                                                                                                                                                                                                                                                                                                                                                                                                                                                                                                                                                                                                                                                                                                                                                                                                                                                                                                                                                                                                                       |
| embryonic proventriculus;                     | FBgn0038118 NULL CG7855 RE03551<br>FBgn0010453 Wnt4 CG4698 RE26454                                                                                                                                                                                                                                                                                                                                                                                                                                                                                                                                                                                                                                                                                                                                                                                                                                                                                                                                                                          |
|                                               | FBgn0032130 CG3838 CG3838 LD21447<br>FBgn0015773 NetA CG18657 RE11206<br>FBgn0010453 Wnt4 CG4698 RE26454                                                                                                                                                                                                                                                                                                                                                                                                                                                                                                                                                                                                                                                                                                                                                                                                                                                                                                                                    |
| procephalic ectoderm primordium;              | FBgn0036494 Toll-6 CG7250 LD08841<br>FBgn0033802 CG17724 CG17724 LD12453<br>FBgn0037707 RnpS1 CG16788 LD23870<br>FBgn0000071 Ama CG2198 LD39923<br>FBgn0002932 neur CG11988 LD45505<br>FBgn0040271 Sulf1 CG6725 SD04414<br>FBgn0040230 dbo CG6224 RE13447<br>FBgn0002561 l(1)sc CG3839 RE59335<br>FBgn0003300 run CG1849 GH02614<br>FBgn0032130 CG3838 CG3838 LD21447<br>FBgn0015903 apt CG5393 LD45581<br>FBgn0033992 CG11798 CG11798 LD23883<br>FBgn0000611 exd CG8933 LD03509<br>FBgn0000577 en CG9015 LD16125<br>FBgn0003346 Sd CG9999 LD16356<br>FBgn0038118 NULL CG7855 RE03551<br>FBgn0015773 NetA CG18657 RE11206<br>FBgn0015271 Orc5 CG7833 RE16687<br>FBgn0031878 CG9188 CG9188 RE16905<br>FBgn0010453 Wnt4 CG4698 RE26454<br>FBgn0030507 CG11164 CG11164 RE50056<br>FBgn0012066 DNAPol-delta CG5949 RE60511<br>FBgn0032906 CG9273 CG9273 RH07841<br>FBgn0010105 comm CG17943 RH64772<br>FBgn0029512 Aos1 CG12276 LD33652<br>FBgn0017453 Zn72D CG5215 GH12756<br>FBgn0015270 Orc2 CG3041 GH13824<br>FBgn0000577 en CG9015 LD16125 |
|                                               | embryonic/larval circulatory system;                                                                                                                                                                                                                                                                                                                                                                                                                                                                                                                                                                                                                                                                                                                                                                                                                                                                                                                                                                                                        |
| dorsal ectoderm primordium;                   | FBgn0036494 Toll-6 CG7250 LD08841<br>FBgn0000071 Ama CG2198 LD39923<br>FBgn0040271 Sulf1 CG6725 SD04414<br>FBgn0010109 dpn CG8704 RE34993<br>FBgn0003300 run CG1849 GH02614<br>FBgn0015903 apt CG5393 LD45581<br>FBgn0033992 CG11798 CG11798 LD23883<br>FBgn0000611 exd CG8933 LD03509                                                                                                                                                                                                                                                                                                                                                                                                                                                                                                                                                                                                                                                                                                                                                      |

*continued on next page...*

| <i>Table 16 continued from previous page.</i> |                                         |
|-----------------------------------------------|-----------------------------------------|
| Anatomical Structures                         | Genes                                   |
| dorsal epidermis primordium;                  | FBgn0003346 Sd CG9999 LD16356           |
|                                               | FBgn0010105 comm CG17943 RH64772        |
| embryonic stomatogastric nervous system;      | FBgn0036494 Toll-6 CG7250 LD08841       |
|                                               | FBgn0040271 Sulf1 CG6725 SD04414        |
|                                               | FBgn0033992 CG11798 CG11798 LD23883     |
|                                               | FBgn0000611 exd CG8933 LD03509          |
|                                               | FBgn0000577 en CG9015 LD16125           |
|                                               | FBgn0010453 Wnt4 CG4698 RE26454         |
|                                               | FBgn0010105 comm CG17943 RH64772        |
|                                               | FBgn0000577 en CG9015 LD16125           |
| ventral neuroderm anlage;                     | FBgn0031745 CG8965 CG8965 GH01721       |
|                                               | FBgn0002561 l(1)sc CG3839 RE59335       |
|                                               | FBgn0000492 Dr CG1897 LD04235           |
|                                               | FBgn0036494 Toll-6 CG7250 LD08841       |
|                                               | FBgn0033802 CG17724 CG17724 LD12453     |
|                                               | FBgn0037707 RnpS1 CG16788 LD23870       |
|                                               | FBgn0031745 CG8965 CG8965 GH01721       |
|                                               | FBgn0000071 Ama CG2198 LD39923          |
|                                               | FBgn0002932 neur CG11988 LD45505        |
|                                               | FBgn0040271 Sulf1 CG6725 SD04414        |
|                                               | FBgn0040230 dbo CG6224 RE13447          |
|                                               | FBgn0002561 l(1)sc CG3839 RE59335       |
|                                               | FBgn0010109 dpn CG8704 RE34993          |
|                                               | FBgn0003300 run CG1849 GH02614          |
|                                               | FBgn0032130 CG3838 CG3838 LD21447       |
|                                               | FBgn0015903 apt CG5393 LD45581          |
|                                               | FBgn0033992 CG11798 CG11798 LD23883     |
|                                               | FBgn0000611 exd CG8933 LD03509          |
|                                               | FBgn0000577 en CG9015 LD16125           |
|                                               | FBgn0003346 Sd CG9999 LD16356           |
|                                               | FBgn0000492 Dr CG1897 LD04235           |
|                                               | FBgn0000411 D CG5893 AT02631            |
|                                               | FBgn0038118 NULL CG7855 RE03551         |
|                                               | FBgn0015773 NetA CG18657 RE11206        |
|                                               | FBgn0052982 CG32982 CG32982 RE11317     |
|                                               | FBgn0015271 Orc5 CG7833 RE16687         |
|                                               | FBgn0031878 CG9188 CG9188 RE16905       |
|                                               | FBgn0010453 Wnt4 CG4698 RE26454         |
|                                               | FBgn0030507 CG11164 CG11164 RE50056     |
|                                               | FBgn0038434 CG14897 CG14897 RE60459     |
|                                               | FBgn0012066 DNapol-delta CG5949 RE60511 |
|                                               | FBgn0032906 CG9273 CG9273 RH07841       |
|                                               | FBgn0010105 comm CG17943 RH64772        |

*continued on next page...*

| <i>Table 16 continued from previous page.</i> |                                     |
|-----------------------------------------------|-------------------------------------|
| Anatomical Structures                         | Genes                               |
| embryonic/larval somatic muscle;              | FBgn0029512 Aosl CG12276 LD33652    |
|                                               | FBgn0017453 Zn72D CG5215 GH12756    |
|                                               | FBgn0015270 Orc2 CG3041 GH13824     |
|                                               | FBgn0000577 en CG9015 LD16125       |
|                                               | FBgn0037707 RnpS1 CG16788 LD23870   |
|                                               | FBgn0031745 CG8965 CG8965 GH01721   |
|                                               | FBgn0040271 Sulf1 CG6725 SD04414    |
|                                               | FBgn0000611 exd CG8933 LD03509      |
|                                               | FBgn0033992 CG11798 CG11798 LD23883 |
|                                               | FBgn0010453 Wnt4 CG4698 RE26454     |
| need new term(larval eye primordium);         | FBgn0002932 neur CG11988 LD45505    |
| embryonic inner optic lobe;                   | FBgn0002561 l(1)sc CG3839 RE59335   |
| ventral sensory complex specific anlage;      | FBgn0036494 Toll-6 CG7250 LD08841   |
| procephalic ectoderm anlage;                  | FBgn0033802 CG17724 CG17724 LD12453 |
|                                               | FBgn0037707 RnpS1 CG16788 LD23870   |
|                                               | FBgn0000071 Ama CG2198 LD39923      |
|                                               | FBgn0002932 neur CG11988 LD45505    |
|                                               | FBgn0040230 dbo CG6224 RE13447      |
|                                               | FBgn0002561 l(1)sc CG3839 RE59335   |
|                                               | FBgn0003300 run CG1849 GH02614      |
|                                               | FBgn0015903 apt CG5393 LD45581      |
|                                               | FBgn0033992 CG11798 CG11798 LD23883 |
|                                               | FBgn0000611 exd CG8933 LD03509      |
| ring gland;                                   | FBgn0000577 en CG9015 LD16125       |
|                                               | FBgn0003346 Sd CG9999 LD16356       |
|                                               | FBgn0038118 NULL CG7855 RE03551     |
|                                               | FBgn0031878 CG9188 CG9188 RE16905   |
|                                               | FBgn0010453 Wnt4 CG4698 RE26454     |
|                                               | FBgn0030507 CG11164 CG11164 RE50056 |
|                                               | FBgn0010105 comm CG17943 RH64772    |
|                                               | FBgn0029512 Aosl CG12276 LD33652    |
|                                               | FBgn0015270 Orc2 CG3041 GH13824     |
|                                               | FBgn0000577 en CG9015 LD16125       |
| dorsal ectoderm anlage;                       | FBgn0015903 apt CG5393 LD45581      |
|                                               | FBgn0000071 Ama CG2198 LD39923      |
|                                               | FBgn0010109 dpn CG8704 RE34993      |
|                                               | FBgn0003300 run CG1849 GH02614      |
|                                               | FBgn0033992 CG11798 CG11798 LD23883 |
|                                               | FBgn0000611 exd CG8933 LD03509      |

*continued on next page...*

| <i>Table 16 continued from previous page.</i> |                                     |
|-----------------------------------------------|-------------------------------------|
| Anatomical Structures                         | Genes                               |
| mesectoderm primordium;                       | FBgn0000577 en CG9015 LD16125       |
|                                               | FBgn0003346 Sd CG9999 LD16356       |
|                                               | FBgn0000577 en CG9015 LD16125       |
| embryonic gastric caecum;                     | FBgn0031745 CG8965 CG8965 GH01721   |
|                                               | FBgn0002932 neur CG11988 LD45505    |
|                                               | FBgn0033992 CG11798 CG11798 LD23883 |
|                                               | FBgn0000577 en CG9015 LD16125       |
|                                               | FBgn0003346 Sd CG9999 LD16356       |
|                                               | FBgn0015773 NetA CG18657 RE11206    |
|                                               | FBgn0010105 comm CG17943 RH64772    |
| embryonic hypopharynx;                        | FBgn0000577 en CG9015 LD16125       |
|                                               | FBgn0010453 Wnt4 CG4698 RE26454     |
| embryonic esophageal ganglion;                | FBgn0031745 CG8965 CG8965 GH01721   |
|                                               | FBgn0015903 apt CG5393 LD45581      |
| embryonic/larval dorsal vessel;               | FBgn0031745 CG8965 CG8965 GH01721   |
|                                               | FBgn0015903 apt CG5393 LD45581      |
| embryonic central brain pars intercerebralis; | FBgn0040271 Sulf1 CG6725 SD04414    |
|                                               | FBgn0038118 NULL CG7855 RE03551     |
| embryonic central brain;                      | FBgn0036494 Toll-6 CG7250 LD08841   |
|                                               | FBgn0002932 neur CG11988 LD45505    |
|                                               | FBgn0040271 Sulf1 CG6725 SD04414    |
|                                               | FBgn0040230 dbo CG6224 RE13447      |
|                                               | FBgn0002561 l(1)sc CG3839 RE59335   |
|                                               | FBgn0003300 run CG1849 GH02614      |
|                                               | FBgn0015903 apt CG5393 LD45581      |
|                                               | FBgn0033992 CG11798 CG11798 LD23883 |
|                                               | FBgn0000611 exd CG8933 LD03509      |
|                                               | FBgn0000577 en CG9015 LD16125       |
|                                               | FBgn0003346 Sd CG9999 LD16356       |
|                                               | FBgn0038118 NULL CG7855 RE03551     |
|                                               | FBgn0015773 NetA CG18657 RE11206    |
|                                               | FBgn0010453 Wnt4 CG4698 RE26454     |
|                                               | FBgn0029512 Aos1 CG12276 LD33652    |
|                                               | FBgn0000577 en CG9015 LD16125       |
| embryonic central brain neuron;               | FBgn0002932 neur CG11988 LD45505    |
|                                               | FBgn0040230 dbo CG6224 RE13447      |
|                                               | FBgn0033992 CG11798 CG11798 LD23883 |
|                                               | FBgn0000611 exd CG8933 LD03509      |

*continued on next page...*

Table 16 continued from previous page.

| Anatomical Structures               | Genes                                   |                                   |
|-------------------------------------|-----------------------------------------|-----------------------------------|
| ventral ectoderm primordium;        | FBgn0000577 en CG9015 LD16125           |                                   |
|                                     | FBgn0000411 D CG5893 AT02631            |                                   |
|                                     | FBgn0038118 NULL CG7855 RE03551         |                                   |
|                                     | FBgn0015773 NetA CG18657 RE11206        |                                   |
|                                     | FBgn0010453 Wnt4 CG4698 RE26454         |                                   |
|                                     | FBgn0038434 CG14897 CG14897 RE60459     |                                   |
|                                     | FBgn0029512 Aos1 CG12276 LD33652        |                                   |
|                                     | FBgn0017453 Zn72D CG5215 GH12756        |                                   |
|                                     | FBgn0015270 Orc2 CG3041 GH13824         |                                   |
|                                     | FBgn0000577 en CG9015 LD16125           |                                   |
|                                     | FBgn0036494 Toll-6 CG7250 LD08841       |                                   |
|                                     | FBgn0033802 CG17724 CG17724 LD12453     |                                   |
|                                     | FBgn0000071 Ama CG2198 LD39923          |                                   |
|                                     | FBgn0040230 dbo CG6224 RE13447          |                                   |
|                                     | FBgn0010109 dpn CG8704 RE34993          |                                   |
|                                     | FBgn0003300 run CG1849 GH02614          |                                   |
|                                     | FBgn0032130 CG3838 CG3838 LD21447       |                                   |
|                                     | FBgn0015903 apt CG5393 LD45581          |                                   |
| FBgn0033992 CG11798 CG11798 LD23883 |                                         |                                   |
| visual anlage;                      | FBgn0000611 exd CG8933 LD03509          |                                   |
|                                     | FBgn0000577 en CG9015 LD16125           |                                   |
|                                     | FBgn0003346 Sd CG9999 LD16356           |                                   |
|                                     | FBgn0000492 Dr CG1897 LD04235           |                                   |
|                                     | FBgn0052982 CG32982 CG32982 RE11317     |                                   |
|                                     | FBgn0010453 Wnt4 CG4698 RE26454         |                                   |
|                                     | FBgn0030507 CG11164 CG11164 RE50056     |                                   |
|                                     | FBgn0012066 DNAPol-delta CG5949 RE60511 |                                   |
|                                     | FBgn0000577 en CG9015 LD16125           |                                   |
|                                     | FBgn0015903 apt CG5393 LD45581          |                                   |
|                                     | FBgn0033992 CG11798 CG11798 LD23883     |                                   |
|                                     | FBgn0000611 exd CG8933 LD03509          |                                   |
|                                     | FBgn0003346 Sd CG9999 LD16356           |                                   |
|                                     | FBgn0010105 comm CG17943 RH64772        |                                   |
|                                     | FBgn0015270 Orc2 CG3041 GH13824         |                                   |
|                                     | pericardial cell specific anlage;       | FBgn0015903 apt CG5393 LD45581    |
|                                     | somatic muscle primordium;              | FBgn0037707 RnpS1 CG16788 LD23870 |
|                                     |                                         | FBgn0031745 CG8965 CG8965 GH01721 |
| FBgn0040271 Sulf1 CG6725 SD04414    |                                         |                                   |
| FBgn0002561 l(1)sc CG3839 RE59335   |                                         |                                   |
| FBgn0033992 CG11798 CG11798 LD23883 |                                         |                                   |
| FBgn0000577 en CG9015 LD16125       |                                         |                                   |
| FBgn0000492 Dr CG1897 LD04235       |                                         |                                   |

continued on next page...

| <i>Table 16 continued from previous page.</i> |                                     |
|-----------------------------------------------|-------------------------------------|
| Anatomical Structures                         | Genes                               |
| foregut anlage;                               | FBgn0000577 en CG9015 LD16125       |
|                                               | FBgn0037707 RnpS1 CG16788 LD23870   |
|                                               | FBgn0002932 neur CG11988 LD45505    |
|                                               | FBgn0015903 apt CG5393 LD45581      |
|                                               | FBgn0000611 exd CG8933 LD03509      |
|                                               | FBgn0003346 Sd CG9999 LD16356       |
|                                               | FBgn0010453 Wnt4 CG4698 RE26454     |
| inclusive hindgut primordium;                 | FBgn0037707 RnpS1 CG16788 LD23870   |
|                                               | FBgn0031745 CG8965 CG8965 GH01721   |
|                                               | FBgn0040230 dbo CG6224 RE13447      |
|                                               | FBgn0010109 dpn CG8704 RE34993      |
|                                               | FBgn0003300 run CG1849 GH02614      |
|                                               | FBgn0015903 apt CG5393 LD45581      |
|                                               | FBgn0000611 exd CG8933 LD03509      |
|                                               | FBgn0000577 en CG9015 LD16125       |
|                                               | FBgn0003346 Sd CG9999 LD16356       |
|                                               | FBgn0000411 D CG5893 AT02631        |
|                                               | FBgn0000577 en CG9015 LD16125       |
| circular visceral muscle fibers;              |                                     |
| need new term(sensory system head);           | FBgn0015773 NetA CG18657 RE11206    |
|                                               | FBgn0010109 dpn CG8704 RE34993      |
|                                               | FBgn0033992 CG11798 CG11798 LD23883 |
|                                               | FBgn0010105 comm CG17943 RH64772    |
|                                               | FBgn0017453 Zn72D CG5215 GH12756    |
| lateral cord surface glia;                    |                                     |
|                                               | FBgn0002932 neur CG11988 LD45505    |
|                                               | FBgn0038118 NULL CG7855 RE03551     |
|                                               | FBgn0015270 Orc2 CG3041 GH13824     |
| stomatogastric nervous system primordium;     |                                     |
|                                               | FBgn0031745 CG8965 CG8965 GH01721   |
|                                               | FBgn0002561 l(1)sc CG3839 RE59335   |
|                                               | FBgn0000492 Dr CG1897 LD04235       |
| embryonic/larval muscle system;               |                                     |
|                                               | FBgn0037707 RnpS1 CG16788 LD23870   |
|                                               | FBgn0000611 exd CG8933 LD03509      |
|                                               | FBgn0000492 Dr CG1897 LD04235       |
|                                               | FBgn0015773 NetA CG18657 RE11206    |
| anterior endoderm primordium;                 |                                     |
|                                               | FBgn0037707 RnpS1 CG16788 LD23870   |
|                                               | FBgn0032130 CG3838 CG3838 LD21447   |
|                                               | FBgn0015903 apt CG5393 LD45581      |
|                                               | FBgn0000611 exd CG8933 LD03509      |
|                                               | FBgn0003346 Sd CG9999 LD16356       |

*continued on next page...*

| <i>Table 16 continued from previous page.</i> |                                                                                                                                                                                                                                                                                                                                                                                                                                                                                                                                                                                                                                                                                         |
|-----------------------------------------------|-----------------------------------------------------------------------------------------------------------------------------------------------------------------------------------------------------------------------------------------------------------------------------------------------------------------------------------------------------------------------------------------------------------------------------------------------------------------------------------------------------------------------------------------------------------------------------------------------------------------------------------------------------------------------------------------|
| Anatomical Structures                         | Genes                                                                                                                                                                                                                                                                                                                                                                                                                                                                                                                                                                                                                                                                                   |
| embryonic rectum;                             | FBgn0000492 Dr CG1897 LD04235<br>FBgn0010453 Wnt4 CG4698 RE26454                                                                                                                                                                                                                                                                                                                                                                                                                                                                                                                                                                                                                        |
| posterior midgut primordium;                  | FBgn0037707 RnpS1 CG16788 LD23870<br>FBgn0000071 Ama CG2198 LD39923<br>FBgn0002561 l(1)sc CG3839 RE59335<br>FBgn0017453 Zn72D CG5215 GH12756                                                                                                                                                                                                                                                                                                                                                                                                                                                                                                                                            |
| ventral sensory complex primordium;           | FBgn0002932 neur CG11988 LD45505<br>FBgn0040271 Sulf1 CG6725 SD04414<br>FBgn0003300 run CG1849 GH02614<br>FBgn0033992 CG11798 CG11798 LD23883                                                                                                                                                                                                                                                                                                                                                                                                                                                                                                                                           |
| sensory nervous system specific anlage;       | FBgn0000071 Ama CG2198 LD39923<br>FBgn0002932 neur CG11988 LD45505<br>FBgn0002561 l(1)sc CG3839 RE59335<br>FBgn0010109 dpn CG8704 RE34993<br>FBgn0017453 Zn72D CG5215 GH12756                                                                                                                                                                                                                                                                                                                                                                                                                                                                                                           |
| posterior endoderm primordium;                | FBgn0037707 RnpS1 CG16788 LD23870<br>FBgn0002561 l(1)sc CG3839 RE59335<br>FBgn0032130 CG3838 CG3838 LD21447<br>FBgn0015903 apt CG5393 LD45581<br>FBgn0000611 exd CG8933 LD03509<br>FBgn0003346 Sd CG9999 LD16356                                                                                                                                                                                                                                                                                                                                                                                                                                                                        |
| ventral ectoderm anlage;                      | FBgn0036494 Toll-6 CG7250 LD08841<br>FBgn0031745 CG8965 CG8965 GH01721<br>FBgn0000071 Ama CG2198 LD39923<br>FBgn0002932 neur CG11988 LD45505<br>FBgn0040230 dbo CG6224 RE13447<br>FBgn0002561 l(1)sc CG3839 RE59335<br>FBgn0010109 dpn CG8704 RE34993<br>FBgn0003300 run CG1849 GH02614<br>FBgn0032130 CG3838 CG3838 LD21447<br>FBgn0015903 apt CG5393 LD45581<br>FBgn0033992 CG11798 CG11798 LD23883<br>FBgn0000611 exd CG8933 LD03509<br>FBgn0000577 en CG9015 LD16125<br>FBgn0003346 Sd CG9999 LD16356<br>FBgn0000492 Dr CG1897 LD04235<br>FBgn0000411 D CG5893 AT02631<br>FBgn0038118 NULL CG7855 RE03551<br>FBgn0052982 CG32982 CG32982 RE11317<br>FBgn0010453 Wnt4 CG4698 RE26454 |
| <i>continued on next page...</i>              |                                                                                                                                                                                                                                                                                                                                                                                                                                                                                                                                                                                                                                                                                         |



| <i>Table 16 continued from previous page.</i> |                                     |
|-----------------------------------------------|-------------------------------------|
| Anatomical Structures                         | Genes                               |
| embryonic central brain glia;                 | FBgn0010105 comm CG17943 RH64772    |
|                                               | FBgn0015270 Orc2 CG3041 GH13824     |
|                                               | FBgn0000577 en CG9015 LD16125       |
|                                               | FBgn0002932 neur CG11988 LD45505    |
|                                               | FBgn0033992 CG11798 CG11798 LD23883 |
|                                               | FBgn0000611 exd CG8933 LD03509      |
|                                               | FBgn0000411 D CG5893 AT02631        |
|                                               | FBgn0029512 Aos1 CG12276 LD33652    |
|                                               | FBgn0017453 Zn72D CG5215 GH12756    |
|                                               | FBgn0015270 Orc2 CG3041 GH13824     |
| embryonic frontal ganglion;                   | FBgn0031745 CG8965 CG8965 GH01721   |
|                                               | FBgn0040271 Sulf1 CG6725 SD04414    |
| midline primordium;                           | FBgn0002561 l(1)sc CG3839 RE59335   |
|                                               | FBgn0000577 en CG9015 LD16125       |
|                                               | FBgn0015773 NetA CG18657 RE11206    |
|                                               | FBgn0010105 comm CG17943 RH64772    |
|                                               | FBgn0000577 en CG9015 LD16125       |
|                                               | FBgn0037707 RnpS1 CG16788 LD23870   |
|                                               | FBgn0031745 CG8965 CG8965 GH01721   |
| hindgut proper primordium;                    | FBgn0040230 dbo CG6224 RE13447      |
|                                               | FBgn0000577 en CG9015 LD16125       |
|                                               | FBgn0000411 D CG5893 AT02631        |
|                                               | FBgn0010453 Wnt4 CG4698 RE26454     |
|                                               | FBgn0017453 Zn72D CG5215 GH12756    |
|                                               | FBgn0000577 en CG9015 LD16125       |
|                                               | FBgn0037707 RnpS1 CG16788 LD23870   |
|                                               | FBgn0031745 CG8965 CG8965 GH01721   |
| embryonic/larval visceral muscle;             | FBgn0000611 exd CG8933 LD03509      |
|                                               | FBgn0015773 NetA CG18657 RE11206    |
|                                               | FBgn0040230 dbo CG6224 RE13447      |
| embryonic dorsal pouch;                       | FBgn0015903 apt CG5393 LD45581      |
|                                               | FBgn0040271 Sulf1 CG6725 SD04414    |
| pars intercerebralis primordium;              | FBgn0038118 NULL CG7855 RE03551     |
|                                               | FBgn0031745 CG8965 CG8965 GH01721   |
| ventral midline glia;                         | FBgn0000411 D CG5893 AT02631        |
|                                               | FBgn0033802 CG17724 CG17724 LD12453 |
| embryonic head epidermis;                     | FBgn0040230 dbo CG6224 RE13447      |
|                                               |                                     |

*continued on next page...*

| <i>Table 16 continued from previous page.</i> |                                                                                                                                                                                                                                                                                                                                                                                                                                                                                                                                                                                                                                                                                                                                                                                                                                                                                          |
|-----------------------------------------------|------------------------------------------------------------------------------------------------------------------------------------------------------------------------------------------------------------------------------------------------------------------------------------------------------------------------------------------------------------------------------------------------------------------------------------------------------------------------------------------------------------------------------------------------------------------------------------------------------------------------------------------------------------------------------------------------------------------------------------------------------------------------------------------------------------------------------------------------------------------------------------------|
| Anatomical Structures                         | Genes                                                                                                                                                                                                                                                                                                                                                                                                                                                                                                                                                                                                                                                                                                                                                                                                                                                                                    |
| lymph gland;                                  | FBgn0033992 CG11798 CG11798 LD23883<br>FBgn0000577 en CG9015 LD16125<br>FBgn0000492 Dr CG1897 LD04235<br>FBgn0015773 NetA CG18657 RE11206<br>FBgn0017453 Zn72D CG5215 GH12756<br>FBgn0000577 en CG9015 LD16125                                                                                                                                                                                                                                                                                                                                                                                                                                                                                                                                                                                                                                                                           |
| proventriculus primordium;                    | FBgn0038118 NULL CG7855 RE03551<br>FBgn0032906 CG9273 CG9273 RH07841                                                                                                                                                                                                                                                                                                                                                                                                                                                                                                                                                                                                                                                                                                                                                                                                                     |
| embryonic central brain surface glia;         | FBgn0037707 RnpS1 CG16788 LD23870<br>FBgn0003346 Sd CG9999 LD16356                                                                                                                                                                                                                                                                                                                                                                                                                                                                                                                                                                                                                                                                                                                                                                                                                       |
| embryonic main segment of Malpighian tubule;  | FBgn0002932 neur CG11988 LD45505<br>FBgn0015271 Orc5 CG7833 RE16687<br>FBgn0030507 CG11164 CG11164 RE50056<br>FBgn0012066 DNAPol-delta CG5949 RE60511<br>FBgn0015270 Orc2 CG3041 GH13824                                                                                                                                                                                                                                                                                                                                                                                                                                                                                                                                                                                                                                                                                                 |
| antennal primordium2;                         | FBgn0012066 DNAPol-delta CG5949 RE60511                                                                                                                                                                                                                                                                                                                                                                                                                                                                                                                                                                                                                                                                                                                                                                                                                                                  |
| embryonic central nervous system;             | FBgn0003346 Sd CG9999 LD16356<br><br>FBgn0036494 Toll-6 CG7250 LD08841<br>FBgn0033802 CG17724 CG17724 LD12453<br>FBgn0037707 RnpS1 CG16788 LD23870<br>FBgn0002932 neur CG11988 LD45505<br>FBgn0040271 Sulfl CG6725 SD04414<br>FBgn0040230 dbo CG6224 RE13447<br>FBgn0002561 l(1)sc CG3839 RE59335<br>FBgn0010109 dpn CG8704 RE34993<br>FBgn0003300 run CG1849 GH02614<br>FBgn0015903 apt CG5393 LD45581<br>FBgn0033992 CG11798 CG11798 LD23883<br>FBgn0000611 exd CG8933 LD03509<br>FBgn0000577 en CG9015 LD16125<br>FBgn0003346 Sd CG9999 LD16356<br>FBgn0038118 NULL CG7855 RE03551<br>FBgn0015271 Orc5 CG7833 RE16687<br>FBgn0031878 CG9188 CG9188 RE16905<br>FBgn0010453 Wnt4 CG4698 RE26454<br>FBgn0038434 CG14897 CG14897 RE60459<br>FBgn0032906 CG9273 CG9273 RH07841<br>FBgn0010105 comm CG17943 RH64772<br>FBgn0029512 Aos1 CG12276 LD33652<br>FBgn0017453 Zn72D CG5215 GH12756 |
| <i>continued on next page...</i>              |                                                                                                                                                                                                                                                                                                                                                                                                                                                                                                                                                                                                                                                                                                                                                                                                                                                                                          |

| <i>Table 16 continued from previous page.</i> |                                                                                                                                                                                                                                                                                                                                |
|-----------------------------------------------|--------------------------------------------------------------------------------------------------------------------------------------------------------------------------------------------------------------------------------------------------------------------------------------------------------------------------------|
| Anatomical Structures                         | Genes                                                                                                                                                                                                                                                                                                                          |
| embryonic foregut;                            | FBgn0015270 Orc2 CG3041 GH13824<br>FBgn0000577 en CG9015 LD16125                                                                                                                                                                                                                                                               |
|                                               | FBgn0031745 CG8965 CG8965 GH01721<br>FBgn0015903 apt CG5393 LD45581<br>FBgn0010453 Wnt4 CG4698 RE26454                                                                                                                                                                                                                         |
| tracheal primordium;                          | FBgn0031745 CG8965 CG8965 GH01721<br>FBgn0015903 apt CG5393 LD45581                                                                                                                                                                                                                                                            |
| large intestine specific anlage;              | FBgn0040230 dbo CG6224 RE13447                                                                                                                                                                                                                                                                                                 |
| longitudinal visceral mesoderm primordium;    | FBgn0033992 CG11798 CG11798 LD23883<br>FBgn0010453 Wnt4 CG4698 RE26454                                                                                                                                                                                                                                                         |
| external foregut primordium;                  | FBgn0031745 CG8965 CG8965 GH01721<br>FBgn0015903 apt CG5393 LD45581<br>FBgn0000577 en CG9015 LD16125<br>FBgn0003346 Sd CG9999 LD16356<br>FBgn0000492 Dr CG1897 LD04235<br>FBgn0010453 Wnt4 CG4698 RE26454<br>FBgn0000577 en CG9015 LD16125                                                                                     |
|                                               | FBgn0040271 Sulf1 CG6725 SD04414<br>FBgn0040230 dbo CG6224 RE13447<br>FBgn0002561 l(1)sc CG3839 RE59335<br>FBgn0033992 CG11798 CG11798 LD23883<br>FBgn0010453 Wnt4 CG4698 RE26454                                                                                                                                              |
| procephalic neuroblasts;                      | FBgn0002932 neur CG11988 LD45505<br>FBgn0033992 CG11798 CG11798 LD23883<br>FBgn0000611 exd CG8933 LD03509<br>FBgn0000411 D CG5893 AT02631<br>FBgn0038118 NULL CG7855 RE03551<br>FBgn0052982 CG32982 CG32982 RE11317<br>FBgn0029512 Aos1 CG12276 LD33652<br>FBgn0017453 Zn72D CG5215 GH12756<br>FBgn0015270 Orc2 CG3041 GH13824 |
| embryonic small intestine;                    | FBgn0010453 Wnt4 CG4698 RE26454                                                                                                                                                                                                                                                                                                |
| head epidermis primordium;                    | FBgn0015903 apt CG5393 LD45581<br>FBgn0003346 Sd CG9999 LD16356                                                                                                                                                                                                                                                                |
| embryonic inner optic lobe primordium;        | FBgn0010453 Wnt4 CG4698 RE26454                                                                                                                                                                                                                                                                                                |
| salivary gland body primordium;               |                                                                                                                                                                                                                                                                                                                                |

*continued on next page...*

| <i>Table 16 continued from previous page.</i> |                                     |
|-----------------------------------------------|-------------------------------------|
| Anatomical Structures                         | Genes                               |
| embryonic brain;                              | FBgn0000492 Dr CG1897 LD04235       |
|                                               | FBgn0036494 Toll-6 CG7250 LD08841   |
|                                               | FBgn0037707 RnpS1 CG16788 LD23870   |
|                                               | FBgn0040271 Sulf1 CG6725 SD04414    |
|                                               | FBgn0040230 dbo CG6224 RE13447      |
|                                               | FBgn0003300 run CG1849 GH02614      |
|                                               | FBgn0015903 apt CG5393 LD45581      |
|                                               | FBgn0033992 CG11798 CG11798 LD23883 |
|                                               | FBgn0000611 exd CG8933 LD03509      |
|                                               | FBgn0000577 en CG9015 LD16125       |
|                                               | FBgn0038118 NULL CG7855 RE03551     |
|                                               | FBgn0010453 Wnt4 CG4698 RE26454     |
|                                               | FBgn0029512 Aos1 CG12276 LD33652    |
|                                               | FBgn0017453 Zn72D CG5215 GH12756    |
|                                               | FBgn0000577 en CG9015 LD16125       |
|                                               | trunk mesoderm anlage;              |
| FBgn0031745 CG8965 CG8965 GH01721             |                                     |
| FBgn0000071 Ama CG2198 LD39923                |                                     |
| FBgn0002932 neur CG11988 LD45505              |                                     |
| FBgn0032130 CG3838 CG3838 LD21447             |                                     |
| FBgn0033992 CG11798 CG11798 LD23883           |                                     |
| FBgn0000611 exd CG8933 LD03509                |                                     |
| FBgn0000577 en CG9015 LD16125                 |                                     |
| FBgn0003346 Sd CG9999 LD16356                 |                                     |
| FBgn0000492 Dr CG1897 LD04235                 |                                     |
| FBgn0015773 NetA CG18657 RE11206              |                                     |
| FBgn0052982 CG32982 CG32982 RE11317           |                                     |
| FBgn0000577 en CG9015 LD16125                 |                                     |
| sensory nervous system primordium;            | FBgn0002932 neur CG11988 LD45505    |
|                                               | FBgn0010109 dpn CG8704 RE34993      |
|                                               | FBgn0003300 run CG1849 GH02614      |
|                                               | FBgn0000411 D CG5893 AT02631        |
|                                               | FBgn0017453 Zn72D CG5215 GH12756    |
| anterior endoderm anlage;                     | FBgn0037707 RnpS1 CG16788 LD23870   |
|                                               | FBgn0002932 neur CG11988 LD45505    |
|                                               | FBgn0032130 CG3838 CG3838 LD21447   |
|                                               | FBgn0015903 apt CG5393 LD45581      |
|                                               | FBgn0000611 exd CG8933 LD03509      |
|                                               | FBgn0003346 Sd CG9999 LD16356       |
|                                               | FBgn0038434 CG14897 CG14897 RE60459 |
| embryonic hindgut;                            | FBgn0031745 CG8965 CG8965 GH01721   |

*continued on next page...*

| <i>Table 16 continued from previous page.</i> |                                                                                                                                                                                                                                                                                                                                                                                                                                                                                                                                                                                                                                                                                                                                                                                                                                                                                                                               |
|-----------------------------------------------|-------------------------------------------------------------------------------------------------------------------------------------------------------------------------------------------------------------------------------------------------------------------------------------------------------------------------------------------------------------------------------------------------------------------------------------------------------------------------------------------------------------------------------------------------------------------------------------------------------------------------------------------------------------------------------------------------------------------------------------------------------------------------------------------------------------------------------------------------------------------------------------------------------------------------------|
| Anatomical Structures                         | Genes                                                                                                                                                                                                                                                                                                                                                                                                                                                                                                                                                                                                                                                                                                                                                                                                                                                                                                                         |
| embryonic Malpighian tubule;                  | FBgn0040230 dbo CG6224 RE13447<br>FBgn0000411 D CG5893 AT02631<br>FBgn0010453 Wnt4 CG4698 RE26454<br>FBgn0017453 Zn72D CG5215 GH12756                                                                                                                                                                                                                                                                                                                                                                                                                                                                                                                                                                                                                                                                                                                                                                                         |
|                                               | FBgn0038118 NULL CG7855 RE03551<br>FBgn0012066 DNapol-delta CG5949 RE60511                                                                                                                                                                                                                                                                                                                                                                                                                                                                                                                                                                                                                                                                                                                                                                                                                                                    |
| ventral nerve cord;                           | FBgn0033802 CG17724 CG17724 LD12453<br>FBgn0037707 RnpS1 CG16788 LD23870<br>FBgn0002932 neur CG11988 LD45505<br>FBgn0040271 Sulf1 CG6725 SD04414<br>FBgn0040230 dbo CG6224 RE13447<br>FBgn0010109 dpn CG8704 RE34993<br>FBgn0003300 run CG1849 GH02614<br>FBgn0015903 apt CG5393 LD45581<br>FBgn0033992 CG11798 CG11798 LD23883<br>FBgn0000611 exd CG8933 LD03509<br>FBgn0000577 en CG9015 LD16125<br>FBgn0003346 Sd CG9999 LD16356<br>FBgn0000492 Dr CG1897 LD04235<br>FBgn0000411 D CG5893 AT02631<br>FBgn0052982 CG32982 CG32982 RE11317<br>FBgn0031878 CG9188 CG9188 RE16905<br>FBgn0010453 Wnt4 CG4698 RE26454<br>FBgn0030507 CG11164 CG11164 RE50056<br>FBgn0038434 CG14897 CG14897 RE60459<br>FBgn0012066 DNapol-delta CG5949 RE60511<br>FBgn0032906 CG9273 CG9273 RH07841<br>FBgn0029512 Aos1 CG12276 LD33652<br>FBgn0017453 Zn72D CG5215 GH12756<br>FBgn0015270 Orc2 CG3041 GH13824<br>FBgn0000577 en CG9015 LD16125 |
|                                               | atrium;                                                                                                                                                                                                                                                                                                                                                                                                                                                                                                                                                                                                                                                                                                                                                                                                                                                                                                                       |
| ventral nerve cord primordium;                | FBgn0036494 Toll-6 CG7250 LD08841<br>FBgn0033802 CG17724 CG17724 LD12453<br>FBgn0037707 RnpS1 CG16788 LD23870<br>FBgn0031745 CG8965 CG8965 GH01721<br>FBgn0000071 Ama CG2198 LD39923<br>FBgn0002932 neur CG11988 LD45505<br>FBgn0040271 Sulf1 CG6725 SD04414                                                                                                                                                                                                                                                                                                                                                                                                                                                                                                                                                                                                                                                                  |

*continued on next page...*

| <i>Table 16 continued from previous page.</i> |                                                                                                                                                                                                                                                                                                                                                                                                                                                                                                                                                                                                                                                                                                                                                                                                                                                                                                                                                                                                   |
|-----------------------------------------------|---------------------------------------------------------------------------------------------------------------------------------------------------------------------------------------------------------------------------------------------------------------------------------------------------------------------------------------------------------------------------------------------------------------------------------------------------------------------------------------------------------------------------------------------------------------------------------------------------------------------------------------------------------------------------------------------------------------------------------------------------------------------------------------------------------------------------------------------------------------------------------------------------------------------------------------------------------------------------------------------------|
| Anatomical Structures                         | Genes                                                                                                                                                                                                                                                                                                                                                                                                                                                                                                                                                                                                                                                                                                                                                                                                                                                                                                                                                                                             |
|                                               | FBgn0040230 dbo CG6224 RE13447<br>FBgn0002561 l(1)sc CG3839 RE59335<br>FBgn0010109 dpn CG8704 RE34993<br>FBgn0003300 run CG1849 GH02614<br>FBgn0032130 CG3838 CG3838 LD21447<br>FBgn0015903 apt CG5393 LD45581<br>FBgn0033992 CG11798 CG11798 LD23883<br>FBgn0000611 exd CG8933 LD03509<br>FBgn0000577 en CG9015 LD16125<br>FBgn0003346 Sd CG9999 LD16356<br>FBgn0000492 Dr CG1897 LD04235<br>FBgn0000411 D CG5893 AT02631<br>FBgn0038118 NULL CG7855 RE03551<br>FBgn0015773 NetA CG18657 RE11206<br>FBgn0052982 CG32982 CG32982 RE11317<br>FBgn0015271 Orc5 CG7833 RE16687<br>FBgn0031878 CG9188 CG9188 RE16905<br>FBgn0010453 Wnt4 CG4698 RE26454<br>FBgn0030507 CG11164 CG11164 RE50056<br>FBgn0038434 CG14897 CG14897 RE60459<br>FBgn0012066 DNapol-delta CG5949 RE60511<br>FBgn0032906 CG9273 CG9273 RH07841<br>FBgn0010105 comm CG17943 RH64772<br>FBgn0029512 Aos1 CG12276 LD33652<br>FBgn0017453 Zn72D CG5215 GH12756<br>FBgn0015270 Orc2 CG3041 GH13824<br>FBgn0000577 en CG9015 LD16125 |
| visual primordium;                            | FBgn0002932 neur CG11988 LD45505<br>FBgn0002561 l(1)sc CG3839 RE59335<br>FBgn0015903 apt CG5393 LD45581<br>FBgn0033992 CG11798 CG11798 LD23883<br>FBgn0000611 exd CG8933 LD03509<br>FBgn0003346 Sd CG9999 LD16356<br>FBgn0015271 Orc5 CG7833 RE16687<br>FBgn0010453 Wnt4 CG4698 RE26454<br>FBgn0012066 DNapol-delta CG5949 RE60511                                                                                                                                                                                                                                                                                                                                                                                                                                                                                                                                                                                                                                                                |
| lateral cord;                                 | FBgn0036494 Toll-6 CG7250 LD08841<br>FBgn0033802 CG17724 CG17724 LD12453<br>FBgn0037707 RnpS1 CG16788 LD23870<br>FBgn0031745 CG8965 CG8965 GH01721<br>FBgn0000071 Ama CG2198 LD39923<br>FBgn0002932 neur CG11988 LD45505<br>FBgn0040271 Sulfl CG6725 SD04414<br>FBgn0040230 dbo CG6224 RE13447                                                                                                                                                                                                                                                                                                                                                                                                                                                                                                                                                                                                                                                                                                    |

*continued on next page...*

| <i>Table 16 continued from previous page.</i> |                                                                                                                                                                                                                                                                                                                                                                                                                                                                                                                                                                                                                                                                                                                                                                                                                                                                                                                                                                 |
|-----------------------------------------------|-----------------------------------------------------------------------------------------------------------------------------------------------------------------------------------------------------------------------------------------------------------------------------------------------------------------------------------------------------------------------------------------------------------------------------------------------------------------------------------------------------------------------------------------------------------------------------------------------------------------------------------------------------------------------------------------------------------------------------------------------------------------------------------------------------------------------------------------------------------------------------------------------------------------------------------------------------------------|
| Anatomical Structures                         | Genes                                                                                                                                                                                                                                                                                                                                                                                                                                                                                                                                                                                                                                                                                                                                                                                                                                                                                                                                                           |
|                                               | FBgn0002561 l(1)sc CG3839 RE59335<br>FBgn0010109 dpn CG8704 RE34993<br>FBgn0003300 run CG1849 GH02614<br>FBgn0032130 CG3838 CG3838 LD21447<br>FBgn0015903 apt CG5393 LD45581<br>FBgn0033992 CG11798 CG11798 LD23883<br>FBgn0000611 exd CG8933 LD03509<br>FBgn0000577 en CG9015 LD16125<br>FBgn0003346 Sd CG9999 LD16356<br>FBgn0000492 Dr CG1897 LD04235<br>FBgn0000411 D CG5893 AT02631<br>FBgn0038118 NULL CG7855 RE03551<br>FBgn0015773 NetA CG18657 RE11206<br>FBgn0052982 CG32982 CG32982 RE11317<br>FBgn0015271 Orc5 CG7833 RE16687<br>FBgn0031878 CG9188 CG9188 RE16905<br>FBgn0010453 Wnt4 CG4698 RE26454<br>FBgn0030507 CG11164 CG11164 RE50056<br>FBgn0038434 CG14897 CG14897 RE60459<br>FBgn0012066 DNAPol-delta CG5949 RE60511<br>FBgn0032906 CG9273 CG9273 RH07841<br>FBgn0010105 comm CG17943 RH64772<br>FBgn0029512 Aos1 CG12276 LD33652<br>FBgn0017453 Zn72D CG5215 GH12756<br>FBgn0015270 Orc2 CG3041 GH13824<br>FBgn0000577 en CG9015 LD16125 |
| foregut primordium;                           |                                                                                                                                                                                                                                                                                                                                                                                                                                                                                                                                                                                                                                                                                                                                                                                                                                                                                                                                                                 |
| embryonic leading edge cell specific anlage;  | FBgn0031745 CG8965 CG8965 GH01721<br>FBgn0010453 Wnt4 CG4698 RE26454                                                                                                                                                                                                                                                                                                                                                                                                                                                                                                                                                                                                                                                                                                                                                                                                                                                                                            |
| posterior endoderm anlage;                    | FBgn0010453 Wnt4 CG4698 RE26454                                                                                                                                                                                                                                                                                                                                                                                                                                                                                                                                                                                                                                                                                                                                                                                                                                                                                                                                 |
|                                               | FBgn0037707 RnpS1 CG16788 LD23870<br>FBgn0002932 neur CG11988 LD45505<br>FBgn0002561 l(1)sc CG3839 RE59335<br>FBgn0032130 CG3838 CG3838 LD21447<br>FBgn0015903 apt CG5393 LD45581<br>FBgn0000611 exd CG8933 LD03509<br>FBgn0003346 Sd CG9999 LD16356<br>FBgn0052982 CG32982 CG32982 RE11317<br>FBgn0038434 CG14897 CG14897 RE60459                                                                                                                                                                                                                                                                                                                                                                                                                                                                                                                                                                                                                              |
| embryonic ventral epidermis;                  | FBgn0031745 CG8965 CG8965 GH01721<br>FBgn0040230 dbo CG6224 RE13447<br>FBgn0000411 D CG5893 AT02631<br>FBgn0015773 NetA CG18657 RE11206                                                                                                                                                                                                                                                                                                                                                                                                                                                                                                                                                                                                                                                                                                                                                                                                                         |

*continued on next page...*

| <i>Table 16 continued from previous page.</i> |                                     |
|-----------------------------------------------|-------------------------------------|
| Anatomical Structures                         | Genes                               |
| lateral cord neuron;                          | FBgn0052982 CG32982 CG32982 RE11317 |
|                                               | FBgn0010105 comm CG17943 RH64772    |
|                                               | FBgn0036494 Toll-6 CG7250 LD08841   |
|                                               | FBgn0002932 neur CG11988 LD45505    |
|                                               | FBgn0040271 Sulf1 CG6725 SD04414    |
|                                               | FBgn0040230 dbo CG6224 RE13447      |
|                                               | FBgn0033992 CG11798 CG11798 LD23883 |
|                                               | FBgn0000611 exd CG8933 LD03509      |
|                                               | FBgn0000577 en CG9015 LD16125       |
|                                               | FBgn0000492 Dr CG1897 LD04235       |
|                                               | FBgn0000411 D CG5893 AT02631        |
|                                               | FBgn0038118 NULL CG7855 RE03551     |
|                                               | FBgn0015773 NetA CG18657 RE11206    |
|                                               | FBgn0052982 CG32982 CG32982 RE11317 |
|                                               | FBgn0010453 Wnt4 CG4698 RE26454     |
|                                               | FBgn0038434 CG14897 CG14897 RE60459 |
|                                               | FBgn0032906 CG9273 CG9273 RH07841   |
| FBgn0010105 comm CG17943 RH64772              |                                     |
| FBgn0029512 Aos1 CG12276 LD33652              |                                     |
| FBgn0017453 Zn72D CG5215 GH12756              |                                     |
| FBgn0015270 Orc2 CG3041 GH13824               |                                     |
| FBgn0000577 en CG9015 LD16125                 |                                     |
| mesectoderm anlage;                           | FBgn0037707 RnpS1 CG16788 LD23870   |
|                                               | FBgn0031745 CG8965 CG8965 GH01721   |
|                                               | FBgn0002932 neur CG11988 LD45505    |
|                                               | FBgn0033992 CG11798 CG11798 LD23883 |
|                                               | FBgn0000611 exd CG8933 LD03509      |
|                                               | FBgn0000577 en CG9015 LD16125       |
|                                               | FBgn0003346 Sd CG9999 LD16356       |
| FBgn0000577 en CG9015 LD16125                 |                                     |
| visceral muscle primordium;                   | FBgn0037707 RnpS1 CG16788 LD23870   |
|                                               | FBgn0031745 CG8965 CG8965 GH01721   |
|                                               | FBgn0033992 CG11798 CG11798 LD23883 |
|                                               | FBgn0015773 NetA CG18657 RE11206    |
| amnioserosa;                                  | FBgn0000071 Ama CG2198 LD39923      |
| embryonic optic lobe;                         | FBgn0033992 CG11798 CG11798 LD23883 |
| trunk mesoderm primordium;                    | FBgn0010453 Wnt4 CG4698 RE26454     |
|                                               | FBgn0037707 RnpS1 CG16788 LD23870   |
|                                               | FBgn0031745 CG8965 CG8965 GH01721   |
|                                               | FBgn0000071 Ama CG2198 LD39923      |

*continued on next page...*



| <i>Table 16 continued from previous page.</i> |                                     |
|-----------------------------------------------|-------------------------------------|
| Anatomical Structures                         | Genes                               |
| protocerebrum primordium;                     | FBgn0002561 l(1)sc CG3839 RE59335   |
|                                               | FBgn0033992 CG11798 CG11798 LD23883 |
|                                               | FBgn0000611 exd CG8933 LD03509      |
|                                               | FBgn0000577 en CG9015 LD16125       |
|                                               | FBgn0003346 Sd CG9999 LD16356       |
|                                               | FBgn0000492 Dr CG1897 LD04235       |
|                                               | FBgn0015773 NetA CG18657 RE11206    |
|                                               | FBgn0000577 en CG9015 LD16125       |
|                                               | FBgn0036494 Toll-6 CG7250 LD08841   |
|                                               | FBgn0033802 CG17724 CG17724 LD12453 |
|                                               | FBgn0037707 RnpS1 CG16788 LD23870   |
|                                               | FBgn0002932 neur CG11988 LD45505    |
|                                               | FBgn0040271 Sulf1 CG6725 SD04414    |
|                                               | FBgn0040230 dbo CG6224 RE13447      |
|                                               | FBgn0002561 l(1)sc CG3839 RE59335   |
|                                               | FBgn0003300 run CG1849 GH02614      |
|                                               | FBgn0032130 CG3838 CG3838 LD21447   |
|                                               | FBgn0015903 apt CG5393 LD45581      |
|                                               | FBgn0033992 CG11798 CG11798 LD23883 |
|                                               | FBgn0000611 exd CG8933 LD03509      |
|                                               | FBgn0000577 en CG9015 LD16125       |
|                                               | FBgn0003346 Sd CG9999 LD16356       |
|                                               | FBgn0038118 NULL CG7855 RE03551     |
|                                               | FBgn0015773 NetA CG18657 RE11206    |
|                                               | FBgn0015271 Orc5 CG7833 RE16687     |
| FBgn0031878 CG9188 CG9188 RE16905             |                                     |
| FBgn0010453 Wnt4 CG4698 RE26454               |                                     |
| FBgn0030507 CG11164 CG11164 RE50056           |                                     |
| FBgn0038434 CG14897 CG14897 RE60459           |                                     |
| FBgn0012066 DNAPol-delta CG5949 RE60511       |                                     |
| FBgn0032906 CG9273 CG9273 RH07841             |                                     |
| FBgn0029512 Aos1 CG12276 LD33652              |                                     |
| FBgn0017453 Zn72D CG5215 GH12756              |                                     |
| FBgn0015270 Orc2 CG3041 GH13824               |                                     |
| FBgn0000577 en CG9015 LD16125                 |                                     |
| embryonic/larval pericardial cell;            | FBgn0015903 apt CG5393 LD45581      |
| embryonic dorsal pouch primordium;            | FBgn0015903 apt CG5393 LD45581      |
| embryonic/larval tracheal system;             | FBgn0031745 CG8965 CG8965 GH01721   |
| ventral epidermis primordium;                 | FBgn0000071 Ama CG2198 LD39923      |
|                                               | FBgn0036494 Toll-6 CG7250 LD08841   |
|                                               | FBgn0000071 Ama CG2198 LD39923      |

*continued on next page...*

| <i>Table 16 continued from previous page.</i> |                                     |
|-----------------------------------------------|-------------------------------------|
| Anatomical Structures                         | Genes                               |
| neuroblasts of ventral nervous system;        | FBgn0040230 dbo CG6224 RE13447      |
|                                               | FBgn0003300 run CG1849 GH02614      |
|                                               | FBgn0015903 apt CG5393 LD45581      |
|                                               | FBgn0033992 CG11798 CG11798 LD23883 |
|                                               | FBgn0000611 exd CG8933 LD03509      |
|                                               | FBgn0000577 en CG9015 LD16125       |
|                                               | FBgn0000492 Dr CG1897 LD04235       |
|                                               | FBgn0052982 CG32982 CG32982 RE11317 |
|                                               | FBgn0010453 Wnt4 CG4698 RE26454     |
|                                               | FBgn0000577 en CG9015 LD16125       |
|                                               | FBgn0036494 Toll-6 CG7250 LD08841   |
|                                               | FBgn0002932 neur CG11988 LD45505    |
|                                               | FBgn0040271 Sulf1 CG6725 SD04414    |
|                                               | FBgn0040230 dbo CG6224 RE13447      |
|                                               | FBgn0002561 l(1)sc CG3839 RE59335   |
| FBgn0010109 dpn CG8704 RE34993                |                                     |
| FBgn0003300 run CG1849 GH02614                |                                     |
| FBgn0032130 CG3838 CG3838 LD21447             |                                     |
| FBgn0033992 CG11798 CG11798 LD23883           |                                     |
| FBgn0003346 Sd CG9999 LD16356                 |                                     |
| FBgn0000411 D CG5893 AT02631                  |                                     |
| FBgn0038118 NULL CG7855 RE03551               |                                     |
| FBgn0030507 CG11164 CG11164 RE50056           |                                     |
| embryonic dorsal epidermis;                   | FBgn0033802 CG17724 CG17724 LD12453 |
|                                               | FBgn0000577 en CG9015 LD16125       |
|                                               | FBgn0000411 D CG5893 AT02631        |
|                                               | FBgn0015773 NetA CG18657 RE11206    |
|                                               | FBgn0052982 CG32982 CG32982 RE11317 |
| FBgn0000577 en CG9015 LD16125                 |                                     |
| embryonic hypocerebral ganglion;              | FBgn0031745 CG8965 CG8965 GH01721   |
| gnathal primordium;                           | FBgn0000071 Ama CG2198 LD39923      |
|                                               | FBgn0015903 apt CG5393 LD45581      |
|                                               | FBgn0000577 en CG9015 LD16125       |
|                                               | FBgn0000492 Dr CG1897 LD04235       |
|                                               | FBgn0010453 Wnt4 CG4698 RE26454     |
|                                               | FBgn0000577 en CG9015 LD16125       |
| hindgut anlage;                               | FBgn0037707 RnpS1 CG16788 LD23870   |
|                                               | FBgn0031745 CG8965 CG8965 GH01721   |
|                                               | FBgn0040230 dbo CG6224 RE13447      |
|                                               | FBgn0010109 dpn CG8704 RE34993      |
|                                               | FBgn0003300 run CG1849 GH02614      |

*continued on next page...*

| <i>Table 16 continued from previous page.</i> |                                     |
|-----------------------------------------------|-------------------------------------|
| Anatomical Structures                         | Genes                               |
| clypeo-labral primordium;                     | FBgn0015903 apt CG5393 LD45581      |
|                                               | FBgn0000611 exd CG8933 LD03509      |
|                                               | FBgn0000577 en CG9015 LD16125       |
|                                               | FBgn0003346 Sd CG9999 LD16356       |
|                                               | FBgn0000411 D CG5893 AT02631        |
|                                               | FBgn0000577 en CG9015 LD16125       |
| anterior midgut primordium;                   | FBgn0040230 dbo CG6224 RE13447      |
|                                               | FBgn0015903 apt CG5393 LD45581      |
|                                               | FBgn0000577 en CG9015 LD16125       |
|                                               | FBgn0010453 Wnt4 CG4698 RE26454     |
|                                               | FBgn0000577 en CG9015 LD16125       |
| head mesoderm P2 primordium;                  | FBgn0037707 RnpS1 CG16788 LD23870   |
|                                               | FBgn0000071 Ama CG2198 LD39923      |
|                                               | FBgn0017453 Zn72D CG5215 GH12756    |
| cardiac mesoderm primordium;                  | FBgn0000071 Ama CG2198 LD39923      |
|                                               | FBgn0033992 CG11798 CG11798 LD23883 |
|                                               | FBgn0000611 exd CG8933 LD03509      |
|                                               | FBgn0003346 Sd CG9999 LD16356       |
|                                               | FBgn0015773 NetA CG18657 RE11206    |
|                                               | FBgn0052982 CG32982 CG32982 RE11317 |
| embryonic ganglion mother cell;               | FBgn0033992 CG11798 CG11798 LD23883 |
| lamellocyte specific anlage;                  | FBgn0002932 neur CG11988 LD45505    |
|                                               | FBgn0010453 Wnt4 CG4698 RE26454     |
|                                               | FBgn0030507 CG11164 CG11164 RE50056 |
| embryonic large intestine;                    | FBgn0052982 CG32982 CG32982 RE11317 |
|                                               | FBgn0040230 dbo CG6224 RE13447      |
|                                               | FBgn0000577 en CG9015 LD16125       |
|                                               | FBgn0010453 Wnt4 CG4698 RE26454     |
|                                               | FBgn0000577 en CG9015 LD16125       |
