# Supplementary material
Source: PubMed Central journal article supplement (PMC1933477)
Supplement: pcbi.0030144.st017.pdf [file pcbi.0030144.st017.pdf]

Table 17: **Diversity of anatomical annotations of genes comprising functional unit *aep2egut*: embryonic midgut && anterior midgut primordium && anterior endoderm primordium**

| Anatomical Structures                 | Genes                                                                                                                                                                                                                                                                                                                                                                           |
|---------------------------------------|---------------------------------------------------------------------------------------------------------------------------------------------------------------------------------------------------------------------------------------------------------------------------------------------------------------------------------------------------------------------------------|
| embryonic/larval oenocyte;            | FBgn0040297 NHE2 CG9256 RE21674                                                                                                                                                                                                                                                                                                                                                 |
| germ cell;                            | FBgn0037811 CG12592 CG12592 AT09724                                                                                                                                                                                                                                                                                                                                             |
| embryonic esophagus;                  | FBgn0039537 CG5590 CG5590 GH01709<br>FBgn0000659 fkh CG10002 RE03865                                                                                                                                                                                                                                                                                                            |
| fat body/gonad primordium;            | FBgn0037810 CG12819 CG12819 GM08848<br>FBgn0037607 CG8036 CG8036 HL01241<br>FBgn0014868 Ost48 CG9022 LD21941<br>FBgn0000257 car CG12230 LD22396<br>FBgn0011638 La CG10922 RE69138<br>FBgn0037811 CG12592 CG12592 AT09724<br>FBgn0034356 CG10924 CG10924 RE12569<br>FBgn0040297 NHE2 CG9256 RE21674                                                                              |
| dorsal prothoracic pharyngeal muscle; | FBgn0038585 CG7993 CG7993 GH01229<br>FBgn0025140 pit CG6375 LD46167<br>FBgn0033562 CG6751 CG6751 RE59607<br>FBgn0032168 CG13126 CG13126 RE01590<br>FBgn0040260 Ugt36Bc CG17932 RE03785<br>FBgn0052920 CG32920 CG32920 RE19605<br>FBgn0033562 CG6751 CG6751 RE21021<br>FBgn0040297 NHE2 CG9256 RE21674<br>FBgn0032919 CG9253 CG9253 RE27528<br>FBgn0036774 mRpS26 CG7354 RE31184 |
| embryonic epipharynx;                 | FBgn0039537 CG5590 CG5590 GH01709<br>FBgn0020647 KrT95D CG5405 AT03104                                                                                                                                                                                                                                                                                                          |
| dorsal pharyngeal muscle primordium;  | FBgn0010292 bys CG1430 LD14510<br>FBgn0025140 pit CG6375 LD46167<br>FBgn0033562 CG6751 CG6751 RE59607<br>FBgn0011638 La CG10922 RE69138<br>FBgn0032168 CG13126 CG13126 RE01590<br>FBgn0052920 CG32920 CG32920 RE19605<br>FBgn0033562 CG6751 CG6751 RE21021<br>FBgn0040297 NHE2 CG9256 RE21674<br>FBgn0040080 raps CG5692 RE22964<br>FBgn0032919 CG9253 CG9253 RE27528           |
| ventral midline;                      | FBgn0020647 KrT95D CG5405 AT03104                                                                                                                                                                                                                                                                                                                                               |

*continued on next page...*

| <i>Table 17 continued from previous page.</i> |                                      |
|-----------------------------------------------|--------------------------------------|
| Anatomical Structures                         | Genes                                |
| gonad;                                        | FBgn0000659 fkh CG10002 RE03865      |
|                                               | FBgn0033562 CG6751 CG6751 RE59607    |
|                                               | FBgn0011638 La CG10922 RE69138       |
|                                               | FBgn0037811 CG12592 CG12592 AT09724  |
|                                               | FBgn0033562 CG6751 CG6751 RE21021    |
|                                               | FBgn0040080 raps CG5692 RE22964      |
|                                               | FBgn0032919 CG9253 CG9253 RE27528    |
|                                               | FBgn0038636 CG7698 CG7698 RE31408    |
| embryonic maxillary sensory complex;          | FBgn0020647 KrT95D CG5405 AT03104    |
| small intestine specific anlage;              | FBgn0030406 CG1463 CG1463 GM05421    |
|                                               | FBgn0000659 fkh CG10002 RE03865      |
| embryonic midgut;                             | FBgn0053099 CG33099 CG33099 LD12611  |
|                                               | FBgn0037810 CG12819 CG12819 GM08848  |
|                                               | FBgn0010292 bys CG1430 LD14510       |
|                                               | FBgn0031845 CG9232 CG9232 HL01018    |
|                                               | FBgn0037607 CG8036 CG8036 HL01241    |
|                                               | FBgn0012037 Ance CG8827 LD11258      |
|                                               | FBgn0030406 CG1463 CG1463 GM05421    |
|                                               | FBgn0010926 l(3)07882 CG5824 LD15947 |
|                                               | FBgn0038391 GATAe CG10278 LD08432    |
|                                               | FBgn0025366 Ip259 CG5277 GM13959     |
|                                               | FBgn0033637 CG9006 CG9006 GM14222    |
|                                               | FBgn0037707 RnpS1 CG16788 LD23870    |
|                                               | FBgn0029629 CG8636 CG8636 LD24347    |
|                                               | FBgn0038585 CG7993 CG7993 GH01229    |
|                                               | FBgn0039537 CG5590 CG5590 GH01709    |
|                                               | FBgn0025140 pit CG6375 LD46167       |
|                                               | FBgn0027621 Pfrx CG3400 GH17337      |
|                                               | FBgn0014868 Ost48 CG9022 LD21941     |
|                                               | FBgn0000257 car CG12230 LD22396      |
|                                               | FBgn0024364 EG:8D8.4 CG11417 LD23562 |
|                                               | FBgn0037926 CG10535 CG10535 GM13228  |
|                                               | FBgn0033562 CG6751 CG6751 RE59607    |
|                                               | FBgn0011638 La CG10922 RE69138       |
|                                               | FBgn0031229 CG3436 CG3436 GM13767    |
|                                               | FBgn0032512 CG9305 CG9305 GH09630    |
|                                               | FBgn0000054 Adf1 CG15845 LD09689     |
|                                               | FBgn0038391 GATAe CG10278 LD08432    |
|                                               | FBgn0020647 KrT95D CG5405 AT03104    |
|                                               | FBgn0037811 CG12592 CG12592 AT09724  |
|                                               | FBgn0032168 CG13126 CG13126 RE01590  |
|                                               | FBgn0040260 Ugt36Bc CG17932 RE03785  |
|                                               | <i>continued on next page...</i>     |

Table 17 continued from previous page.

| Anatomical Structures            | Genes                                 |
|----------------------------------|---------------------------------------|
|                                  | FBgn0000659 fkh CG10002 RE03865       |
|                                  | FBgn0051810 CG31810 CG31810 RE06583   |
|                                  | FBgn0025631 EG:22E5.11 CG4322 RE06985 |
|                                  | FBgn0035654 CG13290 CG13290 RE08107   |
|                                  | FBgn0034356 CG10924 CG10924 RE12569   |
|                                  | FBgn0037816 CG6345 CG6345 RE15838     |
|                                  | FBgn0052920 CG32920 CG32920 RE19605   |
|                                  | FBgn0033562 CG6751 CG6751 RE21021     |
|                                  | FBgn0040297 NHE2 CG9256 RE21674       |
|                                  | FBgn0040080 raps CG5692 RE22964       |
|                                  | FBgn0032919 CG9253 CG9253 RE27528     |
|                                  | FBgn0036774 mRpS26 CG7354 RE31184     |
|                                  | FBgn0038636 CG7698 CG7698 RE31408     |
|                                  | FBgn0041156 exex CG8254 RE39081       |
|                                  | FBgn0051431 CG31431 CG31431 RE47547   |
|                                  | FBgn0032194 CG4901 CG4901 RE48269     |
|                                  | FBgn0032444 CG5525 CG5525 RE61939     |
|                                  | FBgn0032195 CG4908 CG4908 RH68195     |
|                                  | FBgn0036298 CG10627 CG10627 LD02044   |
|                                  | FBgn0010926 l(3)07882 CG5824 LD15947  |
|                                  | FBgn0027619 Adam CG12131 GH12681      |
|                                  | FBgn0000054 Adf1 CG15845 LD09689      |
|                                  | FBgn0012037 Ance CG8827 LD11258       |
| procephalic ectoderm primordium; | FBgn0037707 RnpS1 CG16788 LD23870     |
|                                  | FBgn0039537 CG5590 CG5590 GH01709     |
|                                  | FBgn0011638 La CG10922 RE69138        |
|                                  | FBgn0037811 CG12592 CG12592 AT09724   |
|                                  | FBgn0000659 fkh CG10002 RE03865       |
|                                  | FBgn0040297 NHE2 CG9256 RE21674       |
|                                  | FBgn0032919 CG9253 CG9253 RE27528     |
|                                  | FBgn0038636 CG7698 CG7698 RE31408     |
| embryonic proventriculus;        | FBgn0012037 Ance CG8827 LD11258       |
|                                  | FBgn0033637 CG9006 CG9006 GM14222     |
|                                  | FBgn0039537 CG5590 CG5590 GH01709     |
|                                  | FBgn0025140 pit CG6375 LD46167        |
|                                  | FBgn0014868 Ost48 CG9022 LD21941      |
|                                  | FBgn0000659 fkh CG10002 RE03865       |
|                                  | FBgn0036298 CG10627 CG10627 LD02044   |
|                                  | FBgn0027619 Adam CG12131 GH12681      |
|                                  | FBgn0012037 Ance CG8827 LD11258       |
| dorsal ectoderm primordium;      | FBgn0027621 Pfrx CG3400 GH17337       |
| dorsal epidermis primordium;     | FBgn0037811 CG12592 CG12592 AT09724   |

continued on next page...

| <i>Table 17 continued from previous page.</i> |                                      |
|-----------------------------------------------|--------------------------------------|
| Anatomical Structures                         | Genes                                |
| Malpighian tubule primordium;                 | FBgn0037811 CG12592 CG12592 AT09724  |
|                                               | FBgn0030406 CG1463 CG1463 GM05421    |
|                                               | FBgn0038391 GATAe CG10278 LD08432    |
|                                               | FBgn0000659 fkh CG10002 RE03865      |
|                                               | FBgn0037816 CG6345 CG6345 RE15838    |
|                                               | FBgn0027619 Adam CG12131 GH12681     |
| embryonic stomatogastric nervous system;      | FBgn0000659 fkh CG10002 RE03865      |
| embryonic/larval somatic muscle;              | FBgn0025366 Ip259 CG5277 GM13959     |
|                                               | FBgn0037707 RnpS1 CG16788 LD23870    |
|                                               | FBgn0029629 CG8636 CG8636 LD24347    |
|                                               | FBgn0038585 CG7993 CG7993 GH01229    |
|                                               | FBgn0039537 CG5590 CG5590 GH01709    |
|                                               | FBgn0025140 pit CG6375 LD46167       |
|                                               | FBgn0024364 EG:8D8.4 CG11417 LD23562 |
|                                               | FBgn0032168 CG13126 CG13126 RE01590  |
|                                               | FBgn0033562 CG6751 CG6751 RE21021    |
|                                               | FBgn0040297 NHE2 CG9256 RE21674      |
|                                               | FBgn0032919 CG9253 CG9253 RE27528    |
|                                               | FBgn0032444 CG5525 CG5525 RE61939    |
| macrophage;                                   | FBgn0040297 NHE2 CG9256 RE21674      |
|                                               | FBgn0051431 CG31431 CG31431 RE47547  |
| labral sensory complex primordium;            | FBgn0035654 CG13290 CG13290 RE08107  |
| embryonic central brain mushroom body;        | FBgn0011638 La CG10922 RE69138       |
|                                               | FBgn0037811 CG12592 CG12592 AT09724  |
| embryonic salivary gland;                     | FBgn0014868 Ost48 CG9022 LD21941     |
|                                               | FBgn0000659 fkh CG10002 RE03865      |
|                                               | FBgn0051810 CG31810 CG31810 RE06583  |
| ring gland;                                   | FBgn0011638 La CG10922 RE69138       |
|                                               | FBgn0033562 CG6751 CG6751 RE21021    |
| mesectoderm primordium;                       | FBgn0027621 Pfrx CG3400 GH17337      |
| embryonic gastric caecum;                     | FBgn0011638 La CG10922 RE69138       |
|                                               | FBgn0032168 CG13126 CG13126 RE01590  |
|                                               | FBgn0033562 CG6751 CG6751 RE21021    |
| embryonic hypopharynx;                        | FBgn0039537 CG5590 CG5590 GH01709    |
|                                               | FBgn0033562 CG6751 CG6751 RE21021    |

*continued on next page...*

| <i>Table 17 continued from previous page.</i> |                                                                                                                                                                                                                                                                                                                                                                                                                                                                                                                                        |
|-----------------------------------------------|----------------------------------------------------------------------------------------------------------------------------------------------------------------------------------------------------------------------------------------------------------------------------------------------------------------------------------------------------------------------------------------------------------------------------------------------------------------------------------------------------------------------------------------|
| Anatomical Structures                         | Genes                                                                                                                                                                                                                                                                                                                                                                                                                                                                                                                                  |
| anal pad specific anlage;                     | FBgn0010926 l(3)07882 CG5824 LD15947                                                                                                                                                                                                                                                                                                                                                                                                                                                                                                   |
| embryonic/larval dorsal vessel;               | FBgn0040297 NHE2 CG9256 RE21674                                                                                                                                                                                                                                                                                                                                                                                                                                                                                                        |
| embryonic central brain;                      | FBgn0011638 La CG10922 RE69138<br>FBgn0031229 CG3436 CG3436 GM13767<br>FBgn0000659 fkh CG10002 RE03865                                                                                                                                                                                                                                                                                                                                                                                                                                 |
| salivary gland body specific anlage;          | FBgn0000659 fkh CG10002 RE03865                                                                                                                                                                                                                                                                                                                                                                                                                                                                                                        |
| embryonic central brain neuron;               | FBgn0037811 CG12592 CG12592 AT09724                                                                                                                                                                                                                                                                                                                                                                                                                                                                                                    |
| ventral ectoderm primordium;                  | FBgn0027621 Pfrx CG3400 GH17337<br>FBgn0011638 La CG10922 RE69138<br>FBgn0037811 CG12592 CG12592 AT09724<br>FBgn0038636 CG7698 CG7698 RE31408                                                                                                                                                                                                                                                                                                                                                                                          |
| adult hindgut precursor;                      | FBgn0036298 CG10627 CG10627 LD02044                                                                                                                                                                                                                                                                                                                                                                                                                                                                                                    |
| gonadal sheath;                               | FBgn0037810 CG12819 CG12819 GM08848                                                                                                                                                                                                                                                                                                                                                                                                                                                                                                    |
| Malpighian tubule main body primordium;       | FBgn0030406 CG1463 CG1463 GM05421<br>FBgn0000659 fkh CG10002 RE03865<br>FBgn0035654 CG13290 CG13290 RE08107                                                                                                                                                                                                                                                                                                                                                                                                                            |
| somatic muscle primordium;                    | FBgn0010292 bys CG1430 LD14510<br>FBgn0010926 l(3)07882 CG5824 LD15947<br>FBgn0037707 RnpS1 CG16788 LD23870<br>FBgn0038585 CG7993 CG7993 GH01229<br>FBgn0039537 CG5590 CG5590 GH01709<br>FBgn0032168 CG13126 CG13126 RE01590<br>FBgn0052920 CG32920 CG32920 RE19605<br>FBgn0033562 CG6751 CG6751 RE21021<br>FBgn0040297 NHE2 CG9256 RE21674<br>FBgn0040080 raps CG5692 RE22964<br>FBgn0032919 CG9253 CG9253 RE27528<br>FBgn0036298 CG10627 CG10627 LD02044<br>FBgn0010926 l(3)07882 CG5824 LD15947<br>FBgn0027619 Adam CG12131 GH12681 |
| inclusive hindgut primordium;                 | FBgn0030406 CG1463 CG1463 GM05421<br>FBgn0025366 Ip259 CG5277 GM13959<br>FBgn0037707 RnpS1 CG16788 LD23870<br>FBgn0029629 CG8636 CG8636 LD24347<br>FBgn0038585 CG7993 CG7993 GH01229                                                                                                                                                                                                                                                                                                                                                   |

*continued on next page...*

| <i>Table 17 continued from previous page.</i> |                                                                                                                                                                                                                                                                                                                                                                                                                                                                                                                                                                                                                                                                                                                                                                                                            |
|-----------------------------------------------|------------------------------------------------------------------------------------------------------------------------------------------------------------------------------------------------------------------------------------------------------------------------------------------------------------------------------------------------------------------------------------------------------------------------------------------------------------------------------------------------------------------------------------------------------------------------------------------------------------------------------------------------------------------------------------------------------------------------------------------------------------------------------------------------------------|
| Anatomical Structures                         | Genes                                                                                                                                                                                                                                                                                                                                                                                                                                                                                                                                                                                                                                                                                                                                                                                                      |
|                                               | FBgn0014868 Ost48 CG9022 LD21941<br>FBgn0011638 La CG10922 RE69138<br>FBgn0038391 GATAe CG10278 LD08432<br>FBgn0037811 CG12592 CG12592 AT09724<br>FBgn0000659 fkh CG10002 RE03865<br>FBgn0035654 CG13290 CG13290 RE08107<br>FBgn0037816 CG6345 CG6345 RE15838<br>FBgn0052920 CG32920 CG32920 RE19605<br>FBgn0033562 CG6751 CG6751 RE21021<br>FBgn0038636 CG7698 CG7698 RE31408<br>FBgn0032444 CG5525 CG5525 RE61939<br>FBgn0036298 CG10627 CG10627 LD02044<br>FBgn0027619 Adam CG12131 GH12681                                                                                                                                                                                                                                                                                                             |
| circular visceral muscle fibers;              |                                                                                                                                                                                                                                                                                                                                                                                                                                                                                                                                                                                                                                                                                                                                                                                                            |
| lateral cord surface glia;                    | FBgn0020647 KrT95D CG5405 AT03104                                                                                                                                                                                                                                                                                                                                                                                                                                                                                                                                                                                                                                                                                                                                                                          |
| stomatogastric nervous system primordium;     | FBgn0025631 EG:22E5.11 CG4322 RE06985                                                                                                                                                                                                                                                                                                                                                                                                                                                                                                                                                                                                                                                                                                                                                                      |
| embryonic/larval muscle system;               | FBgn0000659 fkh CG10002 RE03865                                                                                                                                                                                                                                                                                                                                                                                                                                                                                                                                                                                                                                                                                                                                                                            |
|                                               | FBgn0010926 l(3)07882 CG5824 LD15947<br>FBgn0025366 Ip259 CG5277 GM13959<br>FBgn0037707 RnpS1 CG16788 LD23870<br>FBgn0029629 CG8636 CG8636 LD24347<br>FBgn0038585 CG7993 CG7993 GH01229<br>FBgn0039537 CG5590 CG5590 GH01709<br>FBgn0025140 pit CG6375 LD46167<br>FBgn0024364 EG:8D8.4 CG11417 LD23562<br>FBgn0037926 CG10535 CG10535 GM13228<br>FBgn0011638 La CG10922 RE69138<br>FBgn0032168 CG13126 CG13126 RE01590<br>FBgn0052920 CG32920 CG32920 RE19605<br>FBgn0033562 CG6751 CG6751 RE21021<br>FBgn0040297 NHE2 CG9256 RE21674<br>FBgn0040080 raps CG5692 RE22964<br>FBgn0032919 CG9253 CG9253 RE27528<br>FBgn0036774 mRpS26 CG7354 RE31184<br>FBgn0032444 CG5525 CG5525 RE61939<br>FBgn0036298 CG10627 CG10627 LD02044<br>FBgn0010926 l(3)07882 CG5824 LD15947<br>FBgn0027619 Adam CG12131 GH12681 |
| anterior endoderm primordium;                 | FBgn0053099 CG33099 CG33099 LD12611<br>FBgn0037810 CG12819 CG12819 GM08848<br>FBgn0010292 bys CG1430 LD14510<br>FBgn0031845 CG9232 CG9232 HL01018                                                                                                                                                                                                                                                                                                                                                                                                                                                                                                                                                                                                                                                          |

*continued on next page...*

*Table 17 continued from previous page.*

| Anatomical Structures | Genes                                 |
|-----------------------|---------------------------------------|
|                       | FBgn0037607 CG8036 CG8036 HL01241     |
|                       | FBgn0012037 Ance CG8827 LD11258       |
|                       | FBgn0030406 CG1463 CG1463 GM05421     |
|                       | FBgn0010926 l(3)07882 CG5824 LD15947  |
|                       | FBgn0038391 GATAe CG10278 LD08432     |
|                       | FBgn0025366 Ip259 CG5277 GM13959      |
|                       | FBgn0033637 CG9006 CG9006 GM14222     |
|                       | FBgn0037707 RnpS1 CG16788 LD23870     |
|                       | FBgn0029629 CG8636 CG8636 LD24347     |
|                       | FBgn0038585 CG7993 CG7993 GH01229     |
|                       | FBgn0039537 CG5590 CG5590 GH01709     |
|                       | FBgn0025140 pit CG6375 LD46167        |
|                       | FBgn0027621 Pfrx CG3400 GH17337       |
|                       | FBgn0014868 Ost48 CG9022 LD21941      |
|                       | FBgn0000257 car CG12230 LD22396       |
|                       | FBgn0024364 EG:8D8.4 CG11417 LD23562  |
|                       | FBgn0037926 CG10535 CG10535 GM13228   |
|                       | FBgn0033562 CG6751 CG6751 RE59607     |
|                       | FBgn0011638 La CG10922 RE69138        |
|                       | FBgn0031229 CG3436 CG3436 GM13767     |
|                       | FBgn0032512 CG9305 CG9305 GH09630     |
|                       | FBgn0000054 Adf1 CG15845 LD09689      |
|                       | FBgn0038391 GATAe CG10278 LD08432     |
|                       | FBgn0020647 KrT95D CG5405 AT03104     |
|                       | FBgn0037811 CG12592 CG12592 AT09724   |
|                       | FBgn0032168 CG13126 CG13126 RE01590   |
|                       | FBgn0040260 Ugt36Bc CG17932 RE03785   |
|                       | FBgn0000659 fkh CG10002 RE03865       |
|                       | FBgn0051810 CG31810 CG31810 RE06583   |
|                       | FBgn0025631 EG:22E5.11 CG4322 RE06985 |
|                       | FBgn0035654 CG13290 CG13290 RE08107   |
|                       | FBgn0034356 CG10924 CG10924 RE12569   |
|                       | FBgn0037816 CG6345 CG6345 RE15838     |
|                       | FBgn0052920 CG32920 CG32920 RE19605   |
|                       | FBgn0033562 CG6751 CG6751 RE21021     |
|                       | FBgn0040297 NHE2 CG9256 RE21674       |
|                       | FBgn0040080 raps CG5692 RE22964       |
|                       | FBgn0032919 CG9253 CG9253 RE27528     |
|                       | FBgn0036774 mRpS26 CG7354 RE31184     |
|                       | FBgn0038636 CG7698 CG7698 RE31408     |
|                       | FBgn0041156 exex CG8254 RE39081       |
|                       | FBgn0051431 CG31431 CG31431 RE47547   |
|                       | FBgn0032194 CG4901 CG4901 RE48269     |
|                       | FBgn0032444 CG5525 CG5525 RE61939     |
|                       | FBgn0032195 CG4908 CG4908 RH68195     |
|                       | FBgn0036298 CG10627 CG10627 LD02044   |

*continued on next page...*

*Table 17 continued from previous page.*

| Anatomical Structures               | Genes                                 |
|-------------------------------------|---------------------------------------|
| embryonic rectum;                   | FBgn0010926 l(3)07882 CG5824 LD15947  |
|                                     | FBgn0027619 Adam CG12131 GH12681      |
|                                     | FBgn0000054 Adf1 CG15845 LD09689      |
|                                     | FBgn0012037 Ance CG8827 LD11258       |
| posterior midgut primordium;        | FBgn0000659 fkh CG10002 RE03865       |
|                                     | FBgn0037810 CG12819 CG12819 GM08848   |
|                                     | FBgn0010292 bys CG1430 LD14510        |
|                                     | FBgn0031845 CG9232 CG9232 HL01018     |
|                                     | FBgn0037607 CG8036 CG8036 HL01241     |
|                                     | FBgn0012037 Ance CG8827 LD11258       |
|                                     | FBgn0030406 CG1463 CG1463 GM05421     |
|                                     | FBgn0010926 l(3)07882 CG5824 LD15947  |
|                                     | FBgn0038391 GATAe CG10278 LD08432     |
|                                     | FBgn0025366 Ip259 CG5277 GM13959      |
|                                     | FBgn0033637 CG9006 CG9006 GM14222     |
|                                     | FBgn0037707 RnpS1 CG16788 LD23870     |
|                                     | FBgn0029629 CG8636 CG8636 LD24347     |
|                                     | FBgn0038585 CG7993 CG7993 GH01229     |
|                                     | FBgn0039537 CG5590 CG5590 GH01709     |
|                                     | FBgn0025140 pit CG6375 LD46167        |
|                                     | FBgn0027621 Pfrx CG3400 GH17337       |
|                                     | FBgn0014868 Ost48 CG9022 LD21941      |
|                                     | FBgn0000257 car CG12230 LD22396       |
|                                     | FBgn0024364 EG:8D8.4 CG11417 LD23562  |
|                                     | FBgn0037926 CG10535 CG10535 GM13228   |
|                                     | FBgn0033562 CG6751 CG6751 RE59607     |
|                                     | FBgn0011638 La CG10922 RE69138        |
|                                     | FBgn0031229 CG3436 CG3436 GM13767     |
|                                     | FBgn0032512 CG9305 CG9305 GH09630     |
|                                     | FBgn0000054 Adf1 CG15845 LD09689      |
|                                     | FBgn0038391 GATAe CG10278 LD08432     |
|                                     | FBgn0020647 KrT95D CG5405 AT03104     |
|                                     | FBgn0037811 CG12592 CG12592 AT09724   |
|                                     | FBgn0032168 CG13126 CG13126 RE01590   |
|                                     | FBgn0040260 Ugt36Bc CG17932 RE03785   |
|                                     | FBgn0000659 fkh CG10002 RE03865       |
|                                     | FBgn0051810 CG31810 CG31810 RE06583   |
|                                     | FBgn0025631 EG:22E5.11 CG4322 RE06985 |
|                                     | FBgn0035654 CG13290 CG13290 RE08107   |
|                                     | FBgn0034356 CG10924 CG10924 RE12569   |
|                                     | FBgn0037816 CG6345 CG6345 RE15838     |
| FBgn0052920 CG32920 CG32920 RE19605 |                                       |
| FBgn0033562 CG6751 CG6751 RE21021   |                                       |
| FBgn0040297 NHE2 CG9256 RE21674     |                                       |

*continued on next page...*



| <i>Table 17 continued from previous page.</i> |                                      |
|-----------------------------------------------|--------------------------------------|
| Anatomical Structures                         | Genes                                |
| posterior endoderm primordium;                | FBgn0040080 raps CG5692 RE22964      |
|                                               | FBgn0032919 CG9253 CG9253 RE27528    |
|                                               | FBgn0036774 mRpS26 CG7354 RE31184    |
|                                               | FBgn0038636 CG7698 CG7698 RE31408    |
|                                               | FBgn0041156 exex CG8254 RE39081      |
|                                               | FBgn0032194 CG4901 CG4901 RE48269    |
|                                               | FBgn0032444 CG5525 CG5525 RE61939    |
|                                               | FBgn0032195 CG4908 CG4908 RH68195    |
|                                               | FBgn0036298 CG10627 CG10627 LD02044  |
|                                               | FBgn0010926 l(3)07882 CG5824 LD15947 |
|                                               | FBgn0027619 Adam CG12131 GH12681     |
|                                               | FBgn0000054 Adf1 CG15845 LD09689     |
|                                               | FBgn0012037 Ance CG8827 LD11258      |
|                                               | FBgn0053099 CG33099 CG33099 LD12611  |
|                                               | FBgn0037810 CG12819 CG12819 GM08848  |
|                                               | FBgn0010292 bys CG1430 LD14510       |
|                                               | FBgn0031845 CG9232 CG9232 HL01018    |
|                                               | FBgn0037607 CG8036 CG8036 HL01241    |
|                                               | FBgn0012037 Ance CG8827 LD11258      |
|                                               | FBgn0030406 CG1463 CG1463 GM05421    |
|                                               | FBgn0010926 l(3)07882 CG5824 LD15947 |
|                                               | FBgn0038391 GATAe CG10278 LD08432    |
|                                               | FBgn0025366 Ip259 CG5277 GM13959     |
|                                               | FBgn0033637 CG9006 CG9006 GM14222    |
|                                               | FBgn0037707 RnpS1 CG16788 LD23870    |
|                                               | FBgn0029629 CG8636 CG8636 LD24347    |
|                                               | FBgn0038585 CG7993 CG7993 GH01229    |
|                                               | FBgn0039537 CG5590 CG5590 GH01709    |
|                                               | FBgn0025140 pit CG6375 LD46167       |
|                                               | FBgn0027621 Pfrx CG3400 GH17337      |
|                                               | FBgn0014868 Ost48 CG9022 LD21941     |
|                                               | FBgn0000257 car CG12230 LD22396      |
|                                               | FBgn0024364 EG:8D8.4 CG11417 LD23562 |
| FBgn0037926 CG10535 CG10535 GM13228           |                                      |
| FBgn0033562 CG6751 CG6751 RE59607             |                                      |
| FBgn0011638 La CG10922 RE69138                |                                      |
| FBgn0031229 CG3436 CG3436 GM13767             |                                      |
| FBgn0032512 CG9305 CG9305 GH09630             |                                      |
| FBgn0000054 Adf1 CG15845 LD09689              |                                      |
| FBgn0038391 GATAe CG10278 LD08432             |                                      |
| FBgn0020647 KrT95D CG5405 AT03104             |                                      |
| FBgn0037811 CG12592 CG12592 AT09724           |                                      |
| FBgn0032168 CG13126 CG13126 RE01590           |                                      |
| FBgn0040260 Ugt36Bc CG17932 RE03785           |                                      |
| FBgn0000659 fkh CG10002 RE03865               |                                      |

*continued on next page...*

| <i>Table 17 continued from previous page.</i> |                                                                                                                                                                                                                                                                                                                                                                                                                                                                                                                                                                                                                                                                                                                                                                                                                                                     |
|-----------------------------------------------|-----------------------------------------------------------------------------------------------------------------------------------------------------------------------------------------------------------------------------------------------------------------------------------------------------------------------------------------------------------------------------------------------------------------------------------------------------------------------------------------------------------------------------------------------------------------------------------------------------------------------------------------------------------------------------------------------------------------------------------------------------------------------------------------------------------------------------------------------------|
| Anatomical Structures                         | Genes                                                                                                                                                                                                                                                                                                                                                                                                                                                                                                                                                                                                                                                                                                                                                                                                                                               |
|                                               | FBgn0051810 CG31810 CG31810 RE06583<br>FBgn0025631 EG:22E5.11 CG4322 RE06985<br>FBgn0035654 CG13290 CG13290 RE08107<br>FBgn0034356 CG10924 CG10924 RE12569<br>FBgn0037816 CG6345 CG6345 RE15838<br>FBgn0052920 CG32920 CG32920 RE19605<br>FBgn0033562 CG6751 CG6751 RE21021<br>FBgn0040297 NHE2 CG9256 RE21674<br>FBgn0040080 raps CG5692 RE22964<br>FBgn0032919 CG9253 CG9253 RE27528<br>FBgn0036774 mRpS26 CG7354 RE31184<br>FBgn0038636 CG7698 CG7698 RE31408<br>FBgn0041156 exex CG8254 RE39081<br>FBgn0051431 CG31431 CG31431 RE47547<br>FBgn0032194 CG4901 CG4901 RE48269<br>FBgn0032444 CG5525 CG5525 RE61939<br>FBgn0032195 CG4908 CG4908 RH68195<br>FBgn0036298 CG10627 CG10627 LD02044<br>FBgn0010926 l(3)07882 CG5824 LD15947<br>FBgn0027619 Adam CG12131 GH12681<br>FBgn0000054 Adf1 CG15845 LD09689<br>FBgn0012037 Ance CG8827 LD11258 |
| fat body specific anlage;                     | FBgn0000257 car CG12230 LD22396<br>FBgn0024364 EG:8D8.4 CG11417 LD23562<br>FBgn0033562 CG6751 CG6751 RE59607<br>FBgn0027619 Adam CG12131 GH12681                                                                                                                                                                                                                                                                                                                                                                                                                                                                                                                                                                                                                                                                                                    |
| embryonic central brain glia;                 | FBgn0037811 CG12592 CG12592 AT09724                                                                                                                                                                                                                                                                                                                                                                                                                                                                                                                                                                                                                                                                                                                                                                                                                 |
| prothoracic gland;                            | FBgn0012037 Ance CG8827 LD11258<br>FBgn0012037 Ance CG8827 LD11258                                                                                                                                                                                                                                                                                                                                                                                                                                                                                                                                                                                                                                                                                                                                                                                  |
| midline primordium;                           | FBgn0000659 fkh CG10002 RE03865                                                                                                                                                                                                                                                                                                                                                                                                                                                                                                                                                                                                                                                                                                                                                                                                                     |
| embryonic/larval fat body;                    | FBgn0037607 CG8036 CG8036 HL01241<br>FBgn0033637 CG9006 CG9006 GM14222<br>FBgn0014868 Ost48 CG9022 LD21941<br>FBgn0000257 car CG12230 LD22396<br>FBgn0034356 CG10924 CG10924 RE12569<br>FBgn0040297 NHE2 CG9256 RE21674                                                                                                                                                                                                                                                                                                                                                                                                                                                                                                                                                                                                                             |
| hindgut proper primordium;                    | FBgn0025366 Ip259 CG5277 GM13959<br>FBgn0033637 CG9006 CG9006 GM14222<br>FBgn0037707 RnpS1 CG16788 LD23870<br>FBgn0014868 Ost48 CG9022 LD21941                                                                                                                                                                                                                                                                                                                                                                                                                                                                                                                                                                                                                                                                                                      |
| <i>continued on next page...</i>              |                                                                                                                                                                                                                                                                                                                                                                                                                                                                                                                                                                                                                                                                                                                                                                                                                                                     |

| <i>Table 17 continued from previous page.</i> |                                       |                                     |
|-----------------------------------------------|---------------------------------------|-------------------------------------|
| Anatomical Structures                         | Genes                                 |                                     |
| embryonic/larval visceral muscle;             | FBgn0024364 EG:8D8.4 CG11417 LD23562  |                                     |
|                                               | FBgn0011638 La CG10922 RE69138        |                                     |
|                                               | FBgn0037811 CG12592 CG12592 AT09724   |                                     |
|                                               | FBgn0000659 fkh CG10002 RE03865       |                                     |
|                                               | FBgn0052920 CG32920 CG32920 RE19605   |                                     |
|                                               | FBgn0038636 CG7698 CG7698 RE31408     |                                     |
|                                               | FBgn0032444 CG5525 CG5525 RE61939     |                                     |
|                                               | FBgn0010926 l(3)07882 CG5824 LD15947  |                                     |
|                                               | FBgn0025366 Ip259 CG5277 GM13959      |                                     |
|                                               | FBgn0037707 RnpS1 CG16788 LD23870     |                                     |
| embryonic dorsal pouch;                       | FBgn0029629 CG8636 CG8636 LD24347     |                                     |
|                                               | FBgn0011638 La CG10922 RE69138        |                                     |
|                                               | FBgn0020647 KrT95D CG5405 AT03104     |                                     |
|                                               | FBgn0032168 CG13126 CG13126 RE01590   |                                     |
|                                               | FBgn0032919 CG9253 CG9253 RE27528     |                                     |
|                                               | FBgn0036774 mRpS26 CG7354 RE31184     |                                     |
|                                               | FBgn0012037 Ance CG8827 LD11258       |                                     |
|                                               | FBgn0012037 Ance CG8827 LD11258       |                                     |
|                                               | labral sensory complex;               | FBgn0035654 CG13290 CG13290 RE08107 |
|                                               |                                       | FBgn0035654 CG13290 CG13290 RE08107 |
| embryonic head epidermis;                     | FBgn0012037 Ance CG8827 LD11258       |                                     |
| lymph gland;                                  | FBgn0000659 fkh CG10002 RE03865       |                                     |
|                                               | FBgn0012037 Ance CG8827 LD11258       |                                     |
|                                               | FBgn0012037 Ance CG8827 LD11258       |                                     |
| proventriculus primordium;                    | FBgn0012037 Ance CG8827 LD11258       |                                     |
|                                               | FBgn0037811 CG12592 CG12592 AT09724   |                                     |
|                                               | FBgn0040080 raps CG5692 RE22964       |                                     |
|                                               | FBgn0032919 CG9253 CG9253 RE27528     |                                     |
|                                               | FBgn0012037 Ance CG8827 LD11258       |                                     |
|                                               | FBgn0012037 Ance CG8827 LD11258       |                                     |
|                                               | FBgn0030406 CG1463 CG1463 GM05421     |                                     |
| embryonic central brain surface glia;         | FBgn0037707 RnpS1 CG16788 LD23870     |                                     |
|                                               | FBgn0025140 pit CG6375 LD46167        |                                     |
|                                               | FBgn0024364 EG:8D8.4 CG11417 LD23562  |                                     |
|                                               | FBgn0038391 GATAe CG10278 LD08432     |                                     |
|                                               | FBgn0000659 fkh CG10002 RE03865       |                                     |
|                                               | FBgn0012037 Ance CG8827 LD11258       |                                     |
|                                               | FBgn0025631 EG:22E5.11 CG4322 RE06985 |                                     |
|                                               | FBgn0038391 GATAe CG10278 LD08432     |                                     |
| embryonic midgut chamber;                     | FBgn0032512 CG9305 CG9305 GH09630     |                                     |

*continued on next page...*

| <i>Table 17 continued from previous page.</i>                                     |                                                                                                                                                                                                                                                                                                                                        |                                                                                                                                                                                      |
|-----------------------------------------------------------------------------------|----------------------------------------------------------------------------------------------------------------------------------------------------------------------------------------------------------------------------------------------------------------------------------------------------------------------------------------|--------------------------------------------------------------------------------------------------------------------------------------------------------------------------------------|
| Anatomical Structures                                                             | Genes                                                                                                                                                                                                                                                                                                                                  |                                                                                                                                                                                      |
| embryonic main segment of Malpighian tubule;<br>embryonic central nervous system; | FBgn0033562 CG6751 CG6751 RE21021<br>FBgn0041156 exex CG8254 RE39081<br>FBgn0051431 CG31431 CG31431 RE47547<br>FBgn0032195 CG4908 CG4908 RH68195                                                                                                                                                                                       |                                                                                                                                                                                      |
|                                                                                   | FBgn0000659 fkh CG10002 RE03865                                                                                                                                                                                                                                                                                                        |                                                                                                                                                                                      |
|                                                                                   | FBgn0037607 CG8036 CG8036 HL01241<br>FBgn0037707 RnpS1 CG16788 LD23870<br>FBgn0011638 La CG10922 RE69138<br>FBgn0000054 Adf1 CG15845 LD09689<br>FBgn0037811 CG12592 CG12592 AT09724<br>FBgn0000659 fkh CG10002 RE03865<br>FBgn0025631 EG:22E5.11 CG4322 RE06985<br>FBgn0041156 exex CG8254 RE39081<br>FBgn0000054 Adf1 CG15845 LD09689 |                                                                                                                                                                                      |
|                                                                                   | embryonic foregut;                                                                                                                                                                                                                                                                                                                     | FBgn0039537 CG5590 CG5590 GH01709<br>FBgn0000659 fkh CG10002 RE03865<br>FBgn0040297 NHE2 CG9256 RE21674                                                                              |
|                                                                                   | tracheal primordium;                                                                                                                                                                                                                                                                                                                   | FBgn0037811 CG12592 CG12592 AT09724                                                                                                                                                  |
|                                                                                   | large intestine specific anlage;                                                                                                                                                                                                                                                                                                       | FBgn0000659 fkh CG10002 RE03865                                                                                                                                                      |
|                                                                                   | longitudinal visceral mesoderm primordium;                                                                                                                                                                                                                                                                                             | FBgn0033562 CG6751 CG6751 RE21021<br>FBgn0032919 CG9253 CG9253 RE27528<br>FBgn0036298 CG10627 CG10627 LD02044                                                                        |
|                                                                                   | external foregut primordium;                                                                                                                                                                                                                                                                                                           | FBgn0029629 CG8636 CG8636 LD24347<br>FBgn0014868 Ost48 CG9022 LD21941<br>FBgn0037811 CG12592 CG12592 AT09724<br>FBgn0000659 fkh CG10002 RE03865<br>FBgn0033562 CG6751 CG6751 RE21021 |
|                                                                                   | embryonic proventriculus outer layer;                                                                                                                                                                                                                                                                                                  | FBgn0014868 Ost48 CG9022 LD21941                                                                                                                                                     |
|                                                                                   | lateral cord glia;                                                                                                                                                                                                                                                                                                                     | FBgn0020647 KrT95D CG5405 AT03104<br>FBgn0037811 CG12592 CG12592 AT09724                                                                                                             |
| procephalic neuroblasts;                                                          | FBgn0037607 CG8036 CG8036 HL01241<br>FBgn0031229 CG3436 CG3436 GM13767                                                                                                                                                                                                                                                                 |                                                                                                                                                                                      |
| rectum specific anlage;                                                           | FBgn0000659 fkh CG10002 RE03865                                                                                                                                                                                                                                                                                                        |                                                                                                                                                                                      |
| embryonic small intestine;                                                        | FBgn0011638 La CG10922 RE69138                                                                                                                                                                                                                                                                                                         |                                                                                                                                                                                      |

*continued on next page...*

| <i>Table 17 continued from previous page.</i> |                                                                                                                                                                                                                                                                                                                                                                                                                                                                                                 |
|-----------------------------------------------|-------------------------------------------------------------------------------------------------------------------------------------------------------------------------------------------------------------------------------------------------------------------------------------------------------------------------------------------------------------------------------------------------------------------------------------------------------------------------------------------------|
| Anatomical Structures                         | Genes                                                                                                                                                                                                                                                                                                                                                                                                                                                                                           |
| procrystal cell;                              | FBgn0000659 fkh CG10002 RE03865                                                                                                                                                                                                                                                                                                                                                                                                                                                                 |
|                                               | FBgn0027621 Pfrx CG3400 GH17337<br>FBgn0040260 Ugt36Bc CG17932 RE03785<br>FBgn0051431 CG31431 CG31431 RE47547                                                                                                                                                                                                                                                                                                                                                                                   |
| garland cell primordium;                      | FBgn0000257 car CG12230 LD22396<br>FBgn0040297 NHE2 CG9256 RE21674                                                                                                                                                                                                                                                                                                                                                                                                                              |
| embryonic brain;                              | FBgn0037607 CG8036 CG8036 HL01241<br>FBgn0030406 CG1463 CG1463 GM05421<br>FBgn0037707 RnpS1 CG16788 LD23870<br>FBgn0014868 Ost48 CG9022 LD21941<br>FBgn0011638 La CG10922 RE69138<br>FBgn0000659 fkh CG10002 RE03865<br>FBgn0025631 EG:22E5.11 CG4322 RE06985                                                                                                                                                                                                                                   |
|                                               | salivary gland body primordium;                                                                                                                                                                                                                                                                                                                                                                                                                                                                 |
| embryonic hindgut;                            | FBgn0031845 CG9232 CG9232 HL01018<br>FBgn0033637 CG9006 CG9006 GM14222<br>FBgn0029629 CG8636 CG8636 LD24347<br>FBgn0039537 CG5590 CG5590 GH01709<br>FBgn0014868 Ost48 CG9022 LD21941<br>FBgn0011638 La CG10922 RE69138<br>FBgn0037811 CG12592 CG12592 AT09724<br>FBgn0000659 fkh CG10002 RE03865<br>FBgn0052920 CG32920 CG32920 RE19605<br>FBgn0032444 CG5525 CG5525 RE61939<br>FBgn0036298 CG10627 CG10627 LD02044<br>FBgn0010926 l(3)07882 CG5824 LD15947<br>FBgn0027619 Adam CG12131 GH12681 |
|                                               | embryonic anal pad;                                                                                                                                                                                                                                                                                                                                                                                                                                                                             |
| embryonic Malpighian tubule;                  |                                                                                                                                                                                                                                                                                                                                                                                                                                                                                                 |

*continued on next page...*

| <i>Table 17 continued from previous page.</i> |                                       |                                   |
|-----------------------------------------------|---------------------------------------|-----------------------------------|
| Anatomical Structures                         | Genes                                 |                                   |
| ventral nerve cord;                           | FBgn0038391 GATAe CG10278 LD08432     |                                   |
|                                               | FBgn0033637 CG9006 CG9006 GM14222     |                                   |
|                                               | FBgn0011638 La CG10922 RE69138        |                                   |
|                                               | FBgn0038391 GATAe CG10278 LD08432     |                                   |
|                                               | FBgn0000659 fkh CG10002 RE03865       |                                   |
|                                               | FBgn0035654 CG13290 CG13290 RE08107   |                                   |
|                                               | FBgn0037816 CG6345 CG6345 RE15838     |                                   |
|                                               | FBgn0036298 CG10627 CG10627 LD02044   |                                   |
|                                               | FBgn0027619 Adam CG12131 GH12681      |                                   |
|                                               | FBgn0037707 RnpS1 CG16788 LD23870     |                                   |
| ventral nerve cord primordium;                | FBgn0014868 Ost48 CG9022 LD21941      |                                   |
|                                               | FBgn0031229 CG3436 CG3436 GM13767     |                                   |
|                                               | FBgn0000054 Adf1 CG15845 LD09689      |                                   |
|                                               | FBgn0037811 CG12592 CG12592 AT09724   |                                   |
|                                               | FBgn0025631 EG:22E5.11 CG4322 RE06985 |                                   |
|                                               | FBgn0041156 exex CG8254 RE39081       |                                   |
|                                               | FBgn0000054 Adf1 CG15845 LD09689      |                                   |
|                                               | FBgn0037607 CG8036 CG8036 HL01241     |                                   |
|                                               | FBgn0037707 RnpS1 CG16788 LD23870     |                                   |
|                                               | FBgn0039537 CG5590 CG5590 GH01709     |                                   |
| visual primordium;                            | FBgn0027621 Pfrx CG3400 GH17337       |                                   |
|                                               | FBgn0037811 CG12592 CG12592 AT09724   |                                   |
|                                               | FBgn0040297 NHE2 CG9256 RE21674       |                                   |
|                                               | foregut primordium;                   | FBgn0038636 CG7698 CG7698 RE31408 |
|                                               |                                       | FBgn0000659 fkh CG10002 RE03865   |
|                                               | lateral cord;                         | FBgn0033562 CG6751 CG6751 RE21021 |
|                                               |                                       | FBgn0037607 CG8036 CG8036 HL01241 |
|                                               | crystal cell;                         | FBgn0037707 RnpS1 CG16788 LD23870 |
|                                               |                                       | FBgn0014868 Ost48 CG9022 LD21941  |
|                                               |                                       | FBgn0040297 NHE2 CG9256 RE21674   |
| FBgn0041156 exex CG8254 RE39081               |                                       |                                   |
| FBgn0027621 Pfrx CG3400 GH17337               |                                       |                                   |
| embryonic ventral epidermis;                  | FBgn0040260 Ugt36Bc CG17932 RE03785   |                                   |
|                                               | FBgn0051431 CG31431 CG31431 RE47547   |                                   |
|                                               | FBgn0035654 CG13290 CG13290 RE08107   |                                   |
| lateral cord neuron;                          | FBgn0037811 CG12592 CG12592 AT09724   |                                   |
|                                               | FBgn0041156 exex CG8254 RE39081       |                                   |
| embryonic midgut interstitial cell;           |                                       |                                   |

*continued on next page...*

| <i>Table 17 continued from previous page.</i> |                                      |                                   |                                     |
|-----------------------------------------------|--------------------------------------|-----------------------------------|-------------------------------------|
| Anatomical Structures                         | Genes                                |                                   |                                     |
| visceral muscle primordium;                   | FBgn0032195 CG4908 CG4908 RH68195    |                                   |                                     |
|                                               | FBgn0010926 l(3)07882 CG5824 LD15947 |                                   |                                     |
|                                               | FBgn0037707 RnpS1 CG16788 LD23870    |                                   |                                     |
|                                               | FBgn0011638 La CG10922 RE69138       |                                   |                                     |
|                                               | FBgn0020647 KrT95D CG5405 AT03104    |                                   |                                     |
|                                               | FBgn0033562 CG6751 CG6751 RE21021    |                                   |                                     |
|                                               | FBgn0032919 CG9253 CG9253 RE27528    |                                   |                                     |
|                                               | FBgn0010926 l(3)07882 CG5824 LD15947 |                                   |                                     |
|                                               | FBgn0053099 CG33099 CG33099 LD12611  |                                   |                                     |
|                                               | FBgn0031845 CG9232 CG9232 HL01018    |                                   |                                     |
| amnioserosa;                                  | FBgn0012037 Ance CG8827 LD11258      |                                   |                                     |
|                                               | FBgn0000659 fkh CG10002 RE03865      |                                   |                                     |
|                                               | FBgn0034356 CG10924 CG10924 RE12569  |                                   |                                     |
|                                               | FBgn0051431 CG31431 CG31431 RE47547  |                                   |                                     |
|                                               | FBgn0012037 Ance CG8827 LD11258      |                                   |                                     |
|                                               | embryonic salivary gland duct;       | FBgn0039537 CG5590 CG5590 GH01709 |                                     |
|                                               |                                      | trunk mesoderm primordium;        | FBgn0053099 CG33099 CG33099 LD12611 |
|                                               |                                      |                                   | FBgn0037810 CG12819 CG12819 GM08848 |
|                                               |                                      |                                   | FBgn0010292 bys CG1430 LD14510      |
|                                               |                                      |                                   | FBgn0030406 CG1463 CG1463 GM05421   |
| FBgn0010926 l(3)07882 CG5824 LD15947          |                                      |                                   |                                     |
| FBgn0025366 Ip259 CG5277 GM13959              |                                      |                                   |                                     |
| FBgn0033637 CG9006 CG9006 GM14222             |                                      |                                   |                                     |
| FBgn0037707 RnpS1 CG16788 LD23870             |                                      |                                   |                                     |
| FBgn0038585 CG7993 CG7993 GH01229             |                                      |                                   |                                     |
| FBgn0039537 CG5590 CG5590 GH01709             |                                      |                                   |                                     |
| FBgn0025140 pit CG6375 LD46167                |                                      |                                   |                                     |
| FBgn0027621 Pfrx CG3400 GH17337               |                                      |                                   |                                     |
| FBgn0014868 Ost48 CG9022 LD21941              |                                      |                                   |                                     |
| FBgn0024364 EG:8D8.4 CG11417 LD23562          |                                      |                                   |                                     |
| FBgn0037926 CG10535 CG10535 GM13228           |                                      |                                   |                                     |
| FBgn0033562 CG6751 CG6751 RE59607             |                                      |                                   |                                     |
| FBgn0011638 La CG10922 RE69138                |                                      |                                   |                                     |
| FBgn0000054 Adf1 CG15845 LD09689              |                                      |                                   |                                     |
| FBgn0032168 CG13126 CG13126 RE01590           |                                      |                                   |                                     |
| FBgn0052920 CG32920 CG32920 RE19605           |                                      |                                   |                                     |
| FBgn0033562 CG6751 CG6751 RE21021             |                                      |                                   |                                     |
| FBgn0040297 NHE2 CG9256 RE21674               |                                      |                                   |                                     |
| FBgn0040080 raps CG5692 RE22964               |                                      |                                   |                                     |
| FBgn0032919 CG9253 CG9253 RE27528             |                                      |                                   |                                     |
| FBgn0038636 CG7698 CG7698 RE31408             |                                      |                                   |                                     |
| FBgn0032444 CG5525 CG5525 RE61939             |                                      |                                   |                                     |

*continued on next page...*

| <i>Table 17 continued from previous page.</i> |                                                                                                                                                                                                                                                                                                                                                                                                                                                                                                                                                                                                                                               |
|-----------------------------------------------|-----------------------------------------------------------------------------------------------------------------------------------------------------------------------------------------------------------------------------------------------------------------------------------------------------------------------------------------------------------------------------------------------------------------------------------------------------------------------------------------------------------------------------------------------------------------------------------------------------------------------------------------------|
| Anatomical Structures                         | Genes                                                                                                                                                                                                                                                                                                                                                                                                                                                                                                                                                                                                                                         |
| protocerebrum primordium;                     | FBgn0036298 CG10627 CG10627 LD02044<br>FBgn0010926 l(3)07882 CG5824 LD15947<br>FBgn0027619 Adam CG12131 GH12681<br>FBgn0000054 Adf1 CG15845 LD09689                                                                                                                                                                                                                                                                                                                                                                                                                                                                                           |
|                                               | FBgn0037707 RnpS1 CG16788 LD23870<br>FBgn0037811 CG12592 CG12592 AT09724<br>FBgn0000659 fkh CG10002 RE03865<br>FBgn0040297 NHE2 CG9256 RE21674<br>FBgn0032919 CG9253 CG9253 RE27528<br>FBgn0038636 CG7698 CG7698 RE31408                                                                                                                                                                                                                                                                                                                                                                                                                      |
| embryonic dorsal pouch primordium;            | FBgn0012037 Ance CG8827 LD11258<br>FBgn0012037 Ance CG8827 LD11258                                                                                                                                                                                                                                                                                                                                                                                                                                                                                                                                                                            |
| embryonic/larval garland cell;                | FBgn0000257 car CG12230 LD22396<br>FBgn0040297 NHE2 CG9256 RE21674                                                                                                                                                                                                                                                                                                                                                                                                                                                                                                                                                                            |
| ventral epidermis primordium;                 | FBgn0037811 CG12592 CG12592 AT09724                                                                                                                                                                                                                                                                                                                                                                                                                                                                                                                                                                                                           |
| neuroblasts of ventral nervous system;        | FBgn0037607 CG8036 CG8036 HL01241<br>FBgn0031229 CG3436 CG3436 GM13767<br>FBgn0040297 NHE2 CG9256 RE21674                                                                                                                                                                                                                                                                                                                                                                                                                                                                                                                                     |
| gnathal primordium;                           | FBgn0035654 CG13290 CG13290 RE08107                                                                                                                                                                                                                                                                                                                                                                                                                                                                                                                                                                                                           |
| embryonic/larval hemocyte;                    | FBgn0040297 NHE2 CG9256 RE21674<br>FBgn0051431 CG31431 CG31431 RE47547                                                                                                                                                                                                                                                                                                                                                                                                                                                                                                                                                                        |
| anterior midgut primordium;                   | FBgn0053099 CG33099 CG33099 LD12611<br>FBgn0037810 CG12819 CG12819 GM08848<br>FBgn0010292 bys CG1430 LD14510<br>FBgn0031845 CG9232 CG9232 HL01018<br>FBgn0037607 CG8036 CG8036 HL01241<br>FBgn0012037 Ance CG8827 LD11258<br>FBgn0030406 CG1463 CG1463 GM05421<br>FBgn0010926 l(3)07882 CG5824 LD15947<br>FBgn0038391 GATAe CG10278 LD08432<br>FBgn0025366 Ip259 CG5277 GM13959<br>FBgn0033637 CG9006 CG9006 GM14222<br>FBgn0037707 RnpS1 CG16788 LD23870<br>FBgn0029629 CG8636 CG8636 LD24347<br>FBgn0038585 CG7993 CG7993 GH01229<br>FBgn0039537 CG5590 CG5590 GH01709<br>FBgn0025140 pit CG6375 LD46167<br>FBgn0027621 Pfrx CG3400 GH17337 |

*continued on next page...*



Table 17 continued from previous page.

| Anatomical Structures        | Genes                                 |
|------------------------------|---------------------------------------|
|                              | FBgn0014868 Ost48 CG9022 LD21941      |
|                              | FBgn0000257 car CG12230 LD22396       |
|                              | FBgn0024364 EG:8D8.4 CG11417 LD23562  |
|                              | FBgn0037926 CG10535 CG10535 GM13228   |
|                              | FBgn0033562 CG6751 CG6751 RE59607     |
|                              | FBgn0011638 La CG10922 RE69138        |
|                              | FBgn0031229 CG3436 CG3436 GM13767     |
|                              | FBgn0032512 CG9305 CG9305 GH09630     |
|                              | FBgn0000054 Adf1 CG15845 LD09689      |
|                              | FBgn0038391 GATAe CG10278 LD08432     |
|                              | FBgn0020647 KrT95D CG5405 AT03104     |
|                              | FBgn0037811 CG12592 CG12592 AT09724   |
|                              | FBgn0032168 CG13126 CG13126 RE01590   |
|                              | FBgn0040260 Ugt36Bc CG17932 RE03785   |
|                              | FBgn0000659 fkh CG10002 RE03865       |
|                              | FBgn0051810 CG31810 CG31810 RE06583   |
|                              | FBgn0025631 EG:22E5.11 CG4322 RE06985 |
|                              | FBgn0035654 CG13290 CG13290 RE08107   |
|                              | FBgn0034356 CG10924 CG10924 RE12569   |
|                              | FBgn0037816 CG6345 CG6345 RE15838     |
|                              | FBgn0052920 CG32920 CG32920 RE19605   |
|                              | FBgn0033562 CG6751 CG6751 RE21021     |
|                              | FBgn0040297 NHE2 CG9256 RE21674       |
|                              | FBgn0040080 raps CG5692 RE22964       |
|                              | FBgn0032919 CG9253 CG9253 RE27528     |
|                              | FBgn0036774 mRpS26 CG7354 RE31184     |
|                              | FBgn0038636 CG7698 CG7698 RE31408     |
|                              | FBgn0041156 exex CG8254 RE39081       |
|                              | FBgn0051431 CG31431 CG31431 RE47547   |
|                              | FBgn0032194 CG4901 CG4901 RE48269     |
|                              | FBgn0032444 CG5525 CG5525 RE61939     |
|                              | FBgn0032195 CG4908 CG4908 RH68195     |
|                              | FBgn0036298 CG10627 CG10627 LD02044   |
|                              | FBgn0010926 l(3)07882 CG5824 LD15947  |
|                              | FBgn0027619 Adam CG12131 GH12681      |
|                              | FBgn0000054 Adf1 CG15845 LD09689      |
|                              | FBgn0012037 Ance CG8827 LD11258       |
| head mesoderm P2 primordium; | FBgn0010292 bys CG1430 LD14510        |
|                              | FBgn0010926 l(3)07882 CG5824 LD15947  |
|                              | FBgn0025366 Ip259 CG5277 GM13959      |
|                              | FBgn0033637 CG9006 CG9006 GM14222     |
|                              | FBgn0039537 CG5590 CG5590 GH01709     |
|                              | FBgn0025140 pit CG6375 LD46167        |
|                              | FBgn0027621 Pfrx CG3400 GH17337       |
|                              | FBgn0014868 Ost48 CG9022 LD21941      |

*continued on next page...*

Table 17 continued from previous page.

| Anatomical Structures           | Genes                                 |
|---------------------------------|---------------------------------------|
|                                 | FBgn0000257 car CG12230 LD22396       |
|                                 | FBgn0024364 EG:8D8.4 CG11417 LD23562  |
|                                 | FBgn0033562 CG6751 CG6751 RE59607     |
|                                 | FBgn0011638 La CG10922 RE69138        |
|                                 | FBgn0000054 Adf1 CG15845 LD09689      |
|                                 | FBgn0040260 Ugt36Bc CG17932 RE03785   |
|                                 | FBgn0025631 EG:22E5.11 CG4322 RE06985 |
|                                 | FBgn0052920 CG32920 CG32920 RE19605   |
|                                 | FBgn0033562 CG6751 CG6751 RE21021     |
|                                 | FBgn0040297 NHE2 CG9256 RE21674       |
|                                 | FBgn0040080 raps CG5692 RE22964       |
|                                 | FBgn0032919 CG9253 CG9253 RE27528     |
|                                 | FBgn0051431 CG31431 CG31431 RE47547   |
|                                 | FBgn0032444 CG5525 CG5525 RE61939     |
|                                 | FBgn0036298 CG10627 CG10627 LD02044   |
|                                 | FBgn0010926 l(3)07882 CG5824 LD15947  |
|                                 | FBgn0027619 Adam CG12131 GH12681      |
|                                 | FBgn0000054 Adf1 CG15845 LD09689      |
| cardiac mesoderm primordium;    |                                       |
| embryonic ganglion mother cell; | FBgn0040297 NHE2 CG9256 RE21674       |
| embryonic salivary gland body;  | FBgn0040297 NHE2 CG9256 RE21674       |
|                                 | FBgn0014868 Ost48 CG9022 LD21941      |
|                                 | FBgn0000054 Adf1 CG15845 LD09689      |
|                                 | FBgn0000659 fkh CG10002 RE03865       |
|                                 | FBgn0051810 CG31810 CG31810 RE06583   |
|                                 | FBgn0000054 Adf1 CG15845 LD09689      |
| lamellocyte specific anlage;    |                                       |
|                                 | FBgn0000257 car CG12230 LD22396       |
|                                 | FBgn0000054 Adf1 CG15845 LD09689      |
|                                 | FBgn0025631 EG:22E5.11 CG4322 RE06985 |
|                                 | FBgn0033562 CG6751 CG6751 RE21021     |
|                                 | FBgn0040297 NHE2 CG9256 RE21674       |
|                                 | FBgn0051431 CG31431 CG31431 RE47547   |
|                                 | FBgn0000054 Adf1 CG15845 LD09689      |
| crystal cell specific anlage;   |                                       |
|                                 | FBgn0027621 Pfrx CG3400 GH17337       |
|                                 | FBgn0040260 Ugt36Bc CG17932 RE03785   |
|                                 | FBgn0025631 EG:22E5.11 CG4322 RE06985 |
|                                 | FBgn0051431 CG31431 CG31431 RE47547   |
| embryonic large intestine;      |                                       |
|                                 | FBgn0011638 La CG10922 RE69138        |
|                                 | FBgn0000659 fkh CG10002 RE03865       |
