# Supplementary material
Source: PubMed Central journal article supplement (PMC1933477)
Supplement: pcbi.0030144.st018.pdf [file pcbi.0030144.st018.pdf]

Table 18: **Diversity of anatomical annotations of genes comprising functional unit pep2ebrain:** embryonic central brain && protocerebrum primordium && procephalic ectoderm primordium

| Anatomical Structures                 | Genes                                                                                                                                                                                                                                                                                         |
|---------------------------------------|-----------------------------------------------------------------------------------------------------------------------------------------------------------------------------------------------------------------------------------------------------------------------------------------------|
| labial sensory complex primordium;    | FBgn0004595 pros CG17228 GH11848                                                                                                                                                                                                                                                              |
| embryonic optic lobe primordium;      | FBgn0002932 neur CG11988 LD45505<br>FBgn0033992 CG11798 CG11798 LD23883<br>FBgn0036786 skl CG13701 RE14076<br>FBgn0035186 CG13912 CG13912 RE20371<br>FBgn0010453 Wnt4 CG4698 RE26454                                                                                                          |
| fat body/gonad primordium;            | FBgn0037811 CG12592 CG12592 AT09724                                                                                                                                                                                                                                                           |
| dorsal prothoracic pharyngeal muscle; | FBgn0031971 CG7224 CG7224 GH18422                                                                                                                                                                                                                                                             |
| dorsal pharyngeal muscle primordium;  | FBgn0033992 CG11798 CG11798 LD23883                                                                                                                                                                                                                                                           |
| ventral midline;                      | FBgn0004868 Gdi CG4422 LD46767<br>FBgn0035542 CG11347 CG11347 GH28550<br>FBgn0040271 Sulf1 CG6725 SD04414<br>FBgn0004584 Rrp1 CG3178 LP05366<br>FBgn0000577 en CG9015 LD16125<br>FBgn0000659 fkh CG10002 RE03865<br>FBgn0015773 NetA CG18657 RE11206<br>FBgn0000577 en CG9015 LD16125         |
| small intestine specific anlage;      | FBgn0000659 fkh CG10002 RE03865                                                                                                                                                                                                                                                               |
| embryonic midgut;                     | FBgn0040271 Sulf1 CG6725 LD03060<br>FBgn0004868 Gdi CG4422 LD46767<br>FBgn0040271 Sulf1 CG6725 SD04414<br>FBgn0037811 CG12592 CG12592 AT09724<br>FBgn0000611 exd CG8933 LD03509<br>FBgn0038118 NULL CG7855 RE03551<br>FBgn0000659 fkh CG10002 RE03865<br>FBgn0010453 Wnt4 CG4698 RE26454      |
| procephalic ectoderm primordium;      | FBgn0040271 Sulf1 CG6725 LD03060<br>FBgn0024332 Mcm3 CG4206 LD07144<br>FBgn0013469 NULL CG12296 RE58581<br>FBgn0036494 Toll-6 CG7250 LD08841<br>FBgn0004868 Gdi CG4422 LD46767<br>FBgn0002932 neur CG11988 LD45505<br>FBgn0035542 CG11347 CG11347 GH28550<br>FBgn0040271 Sulf1 CG6725 SD04414 |
|                                       | <i>continued on next page...</i>                                                                                                                                                                                                                                                              |

Table 18 continued from previous page.

| Anatomical Structures                | Genes                                 |
|--------------------------------------|---------------------------------------|
|                                      | FBgn0004595 pros CG17228 GH11848      |
|                                      | FBgn0040230 dbo CG6224 RE13447        |
|                                      | FBgn0002561 l(1)sc CG3839 RE59335     |
|                                      | FBgn0037947 CG6930 CG6930 RE72719     |
|                                      | FBgn0037811 CG12592 CG12592 AT09724   |
|                                      | FBgn0005677 dac CG4952 RE64054        |
|                                      | FBgn0003300 run CG1849 GH02614        |
|                                      | FBgn0051670 CG31670 CG31670 GH14092   |
|                                      | FBgn0004584 Rrp1 CG3178 LP05366       |
|                                      | FBgn0015903 apt CG5393 LD45581        |
|                                      | FBgn0033992 CG11798 CG11798 LD23883   |
|                                      | FBgn0039211 CG13620 CG13620 SD03914   |
|                                      | FBgn0000611 exd CG8933 LD03509        |
|                                      | FBgn0030507 CG11164 CG11164 RE50056   |
|                                      | FBgn0034878 CG3941 CG3941 LD15650     |
|                                      | FBgn0000577 en CG9015 LD16125         |
|                                      | FBgn0003346 Sd CG9999 LD16356         |
|                                      | FBgn0038118 NULL CG7855 RE03551       |
|                                      | FBgn0000659 fkh CG10002 RE03865       |
|                                      | FBgn0017453 Zn72D CG5215 GH12756      |
|                                      | FBgn0015773 NetA CG18657 RE11206      |
|                                      | FBgn0004567 slp2 CG2939 RE11345       |
|                                      | FBgn0036786 skl CG13701 RE14076       |
|                                      | FBgn0038150 yellow-e3 CG17045 RE14803 |
|                                      | FBgn0035186 CG13912 CG13912 RE20371   |
|                                      | FBgn0010453 Wnt4 CG4698 RE26454       |
|                                      | FBgn0013725 phyl CG10108 RH04401      |
|                                      | FBgn0029512 Aos1 CG12276 LD33652      |
|                                      | FBgn0031971 CG7224 CG7224 GH18422     |
|                                      | FBgn0051670 CG31670 CG31670 GH14092   |
|                                      | FBgn0034878 CG3941 CG3941 LD15650     |
|                                      | FBgn0000577 en CG9015 LD16125         |
| embryonic/larval circulatory system; | FBgn0015903 apt CG5393 LD45581        |
| Malpighian tubule primordium;        | FBgn0000659 fkh CG10002 RE03865       |
| ventral neuroderm anlage;            | FBgn0036494 Toll-6 CG7250 LD08841     |
|                                      | FBgn0002932 neur CG11988 LD45505      |
|                                      | FBgn0040271 Sulf1 CG6725 SD04414      |
|                                      | FBgn0040230 dbo CG6224 RE13447        |
|                                      | FBgn0002561 l(1)sc CG3839 RE59335     |
|                                      | FBgn0003300 run CG1849 GH02614        |
|                                      | FBgn0015903 apt CG5393 LD45581        |
|                                      | FBgn0033992 CG11798 CG11798 LD23883   |
|                                      | FBgn0000611 exd CG8933 LD03509        |

continued on next page...

| <i>Table 18 continued from previous page.</i> |                                                                                                                                                                                                                                                                                                                                                                                                                                                                                                                                                                                                                                                                                                                                                                                                                               |
|-----------------------------------------------|-------------------------------------------------------------------------------------------------------------------------------------------------------------------------------------------------------------------------------------------------------------------------------------------------------------------------------------------------------------------------------------------------------------------------------------------------------------------------------------------------------------------------------------------------------------------------------------------------------------------------------------------------------------------------------------------------------------------------------------------------------------------------------------------------------------------------------|
| Anatomical Structures                         | Genes                                                                                                                                                                                                                                                                                                                                                                                                                                                                                                                                                                                                                                                                                                                                                                                                                         |
|                                               | FBgn0030507 CG11164 CG11164 RE50056<br>FBgn0000577 en CG9015 LD16125<br>FBgn0003346 Sd CG9999 LD16356<br>FBgn0038118 NULL CG7855 RE03551<br>FBgn0017453 Zn72D CG5215 GH12756<br>FBgn0015773 NetA CG18657 RE11206<br>FBgn0010453 Wnt4 CG4698 RE26454<br>FBgn0029512 Aos1 CG12276 LD33652<br>FBgn0000577 en CG9015 LD16125                                                                                                                                                                                                                                                                                                                                                                                                                                                                                                      |
| need new term(larval eye primordium);         | FBgn0004595 pros CG17228 GH11848<br>FBgn0033992 CG11798 CG11798 LD23883                                                                                                                                                                                                                                                                                                                                                                                                                                                                                                                                                                                                                                                                                                                                                       |
| labral sensory complex primordium;            | FBgn0004595 pros CG17228 GH11848                                                                                                                                                                                                                                                                                                                                                                                                                                                                                                                                                                                                                                                                                                                                                                                              |
| embryonic inner optic lobe;                   | FBgn0036786 skl CG13701 RE14076<br>FBgn0010453 Wnt4 CG4698 RE26454                                                                                                                                                                                                                                                                                                                                                                                                                                                                                                                                                                                                                                                                                                                                                            |
| procephalic ectoderm anlage;                  | FBgn0036494 Toll-6 CG7250 LD08841<br>FBgn0002932 neur CG11988 LD45505<br>FBgn0035542 CG11347 CG11347 GH28550<br>FBgn0004595 pros CG17228 GH11848<br>FBgn0040230 dbo CG6224 RE13447<br>FBgn0002561 l(1)sc CG3839 RE59335<br>FBgn0003300 run CG1849 GH02614<br>FBgn0051670 CG31670 CG31670 GH14092<br>FBgn0015903 apt CG5393 LD45581<br>FBgn0033992 CG11798 CG11798 LD23883<br>FBgn0039211 CG13620 CG13620 SD03914<br>FBgn0000611 exd CG8933 LD03509<br>FBgn0030507 CG11164 CG11164 RE50056<br>FBgn0000577 en CG9015 LD16125<br>FBgn0003346 Sd CG9999 LD16356<br>FBgn0038118 NULL CG7855 RE03551<br>FBgn0038150 yellow-e3 CG17045 RE14803<br>FBgn0035186 CG13912 CG13912 RE20371<br>FBgn0010453 Wnt4 CG4698 RE26454<br>FBgn0029512 Aos1 CG12276 LD33652<br>FBgn0051670 CG31670 CG31670 GH14092<br>FBgn0000577 en CG9015 LD16125 |
| ring gland;                                   | FBgn0004584 Rrp1 CG3178 LP05366<br>FBgn0015903 apt CG5393 LD45581<br>FBgn0034878 CG3941 CG3941 LD15650<br>FBgn0031971 CG7224 CG7224 GH18422                                                                                                                                                                                                                                                                                                                                                                                                                                                                                                                                                                                                                                                                                   |
| dorsal ectoderm anlage;                       |                                                                                                                                                                                                                                                                                                                                                                                                                                                                                                                                                                                                                                                                                                                                                                                                                               |

*continued on next page...*

*Table 18 continued from previous page.*

| Anatomical Structures               | Genes                                 |
|-------------------------------------|---------------------------------------|
| mesectoderm primordium;             | FBgn0035542 CG11347 CG11347 GH28550   |
|                                     | FBgn0003300 run CG1849 GH02614        |
|                                     | FBgn0033992 CG11798 CG11798 LD23883   |
|                                     | FBgn0000611 exd CG8933 LD03509        |
|                                     | FBgn0000577 en CG9015 LD16125         |
|                                     | FBgn0003346 Sd CG9999 LD16356         |
|                                     | FBgn0038150 yellow-e3 CG17045 RE14803 |
|                                     | FBgn0000577 en CG9015 LD16125         |
|                                     | FBgn0002932 neur CG11988 LD45505      |
|                                     | FBgn0033992 CG11798 CG11798 LD23883   |
|                                     | FBgn0000577 en CG9015 LD16125         |
|                                     | FBgn0003346 Sd CG9999 LD16356         |
|                                     | FBgn0015773 NetA CG18657 RE11206      |
|                                     | FBgn0004567 slp2 CG2939 RE11345       |
|                                     | FBgn0000577 en CG9015 LD16125         |
| embryonic gastric caecum;           | FBgn0010453 Wnt4 CG4698 RE26454       |
| pericardial cell specific anlage;   | FBgn0015903 apt CG5393 LD45581        |
| circular visceral muscle fibers;    | FBgn0015773 NetA CG18657 RE11206      |
| embryonic/larval muscle system;     | FBgn0000611 exd CG8933 LD03509        |
| anterior endoderm primordium;       | FBgn0015773 NetA CG18657 RE11206      |
| embryonic rectum;                   | FBgn0037811 CG12592 CG12592 AT09724   |
|                                     | FBgn0015903 apt CG5393 LD45581        |
|                                     | FBgn0000611 exd CG8933 LD03509        |
|                                     | FBgn0003346 Sd CG9999 LD16356         |
|                                     | FBgn0000659 fkh CG10002 RE03865       |
| posterior midgut primordium;        | FBgn0000659 fkh CG10002 RE03865       |
| ventral sensory complex primordium; | FBgn0010453 Wnt4 CG4698 RE26454       |
|                                     | FBgn0002561 l(1)sc CG3839 RE59335     |
|                                     | FBgn0037811 CG12592 CG12592 AT09724   |
|                                     | FBgn0000659 fkh CG10002 RE03865       |
|                                     | FBgn0017453 Zn72D CG5215 GH12756      |
|                                     | FBgn0004868 Gdi CG4422 LD46767        |
|                                     | FBgn0002932 neur CG11988 LD45505      |
|                                     | FBgn0040271 Sulf1 CG6725 SD04414      |
|                                     | FBgn0004595 pros CG17228 GH11848      |
|                                     | FBgn0037947 CG6930 CG6930 RE72719     |
|                                     | FBgn0003300 run CG1849 GH02614        |

*continued on next page...*

| <i>Table 18 continued from previous page.</i> |                                       |
|-----------------------------------------------|---------------------------------------|
| Anatomical Structures                         | Genes                                 |
| posterior endoderm primordium;                | FBgn0033992 CG11798 CG11798 LD23883   |
|                                               | FBgn0002561 l(1)sc CG3839 RE59335     |
|                                               | FBgn0037811 CG12592 CG12592 AT09724   |
|                                               | FBgn0015903 apt CG5393 LD45581        |
|                                               | FBgn0000611 exd CG8933 LD03509        |
|                                               | FBgn0003346 Sd CG9999 LD16356         |
|                                               | FBgn0000659 fkh CG10002 RE03865       |
| embryonic corpus cardiacum;                   |                                       |
| embryonic central brain glia;                 | FBgn0031971 CG7224 CG7224 GH18422     |
|                                               | FBgn0002932 neur CG11988 LD45505      |
|                                               | FBgn0037811 CG12592 CG12592 AT09724   |
|                                               | FBgn0004584 Rrp1 CG3178 LP05366       |
|                                               | FBgn0033992 CG11798 CG11798 LD23883   |
|                                               | FBgn0000611 exd CG8933 LD03509        |
|                                               | FBgn0017453 Zn72D CG5215 GH12756      |
|                                               | FBgn0029512 Aos1 CG12276 LD33652      |
| ventral midline neuroblast;                   |                                       |
| midline primordium;                           | FBgn0004595 pros CG17228 GH11848      |
|                                               | FBgn0040271 Sulf1 CG6725 SD04414      |
|                                               | FBgn0002561 l(1)sc CG3839 RE59335     |
|                                               | FBgn0000577 en CG9015 LD16125         |
|                                               | FBgn0000659 fkh CG10002 RE03865       |
|                                               | FBgn0015773 NetA CG18657 RE11206      |
|                                               | FBgn0000577 en CG9015 LD16125         |
| hindgut proper primordium;                    |                                       |
|                                               | FBgn0004868 Gdi CG4422 LD46767        |
|                                               | FBgn0040230 dbo CG6224 RE13447        |
|                                               | FBgn0037811 CG12592 CG12592 AT09724   |
|                                               | FBgn0051670 CG31670 CG31670 GH14092   |
|                                               | FBgn0000577 en CG9015 LD16125         |
|                                               | FBgn0000659 fkh CG10002 RE03865       |
|                                               | FBgn0017453 Zn72D CG5215 GH12756      |
|                                               | FBgn0036786 skl CG13701 RE14076       |
|                                               | FBgn0038150 yellow-e3 CG17045 RE14803 |
|                                               | FBgn0010453 Wnt4 CG4698 RE26454       |
|                                               | FBgn0031971 CG7224 CG7224 GH18422     |
|                                               | FBgn0051670 CG31670 CG31670 GH14092   |
|                                               | FBgn0000577 en CG9015 LD16125         |
| labral sensory complex;                       |                                       |
|                                               | FBgn0004868 Gdi CG4422 LD46767        |
|                                               | FBgn0004595 pros CG17228 GH11848      |
|                                               | FBgn0005677 dac CG4952 RE64054        |
| proventriculus primordium;                    |                                       |

*continued on next page...*

| <i>Table 18 continued from previous page.</i> |                                       |                                     |
|-----------------------------------------------|---------------------------------------|-------------------------------------|
| Anatomical Structures                         | Genes                                 |                                     |
| pole cell;                                    | FBgn0003346 Sd CG9999 LD16356         |                                     |
|                                               | FBgn0000659 fkh CG10002 RE03865       |                                     |
| embryonic central brain surface glia;         | FBgn0039211 CG13620 CG13620 SD03914   |                                     |
|                                               | FBgn0013469 NULL CG12296 RE58581      |                                     |
|                                               | FBgn0002932 neur CG11988 LD45505      |                                     |
|                                               | FBgn0004584 Rrp1 CG3178 LP05366       |                                     |
|                                               | FBgn0030507 CG11164 CG11164 RE50056   |                                     |
| antennal primordium2;                         | FBgn0003346 Sd CG9999 LD16356         |                                     |
| embryonic Bolwig's organ;                     | FBgn0004868 Gdi CG4422 LD46767        |                                     |
|                                               | FBgn0004595 pros CG17228 GH11848      |                                     |
| large intestine specific anlage;              | FBgn0040230 dbo CG6224 RE13447        |                                     |
| longitudinal visceral mesoderm primordium;    | FBgn0000659 fkh CG10002 RE03865       |                                     |
|                                               | FBgn0033992 CG11798 CG11798 LD23883   |                                     |
| external foregut primordium;                  | FBgn0010453 Wnt4 CG4698 RE26454       |                                     |
|                                               | FBgn0037811 CG12592 CG12592 AT09724   |                                     |
|                                               | FBgn0015903 apt CG5393 LD45581        |                                     |
|                                               | FBgn0000577 en CG9015 LD16125         |                                     |
|                                               | FBgn0003346 Sd CG9999 LD16356         |                                     |
|                                               | FBgn0000659 fkh CG10002 RE03865       |                                     |
|                                               | FBgn0036786 skl CG13701 RE14076       |                                     |
|                                               | FBgn0038150 yellow-e3 CG17045 RE14803 |                                     |
|                                               | FBgn0010453 Wnt4 CG4698 RE26454       |                                     |
|                                               | FBgn0000577 en CG9015 LD16125         |                                     |
|                                               | lateral cord glia;                    | FBgn0002932 neur CG11988 LD45505    |
|                                               |                                       | FBgn0037811 CG12592 CG12592 AT09724 |
|                                               |                                       | FBgn0004584 Rrp1 CG3178 LP05366     |
|                                               |                                       | FBgn0033992 CG11798 CG11798 LD23883 |
|                                               |                                       | FBgn0000611 exd CG8933 LD03509      |
| FBgn0038118 NULL CG7855 RE03551               |                                       |                                     |
| FBgn0017453 Zn72D CG5215 GH12756              |                                       |                                     |
| FBgn0029512 Aos1 CG12276 LD33652              |                                       |                                     |
| embryonic foregut sensory structure;          | FBgn0004595 pros CG17228 GH11848      |                                     |
| head epidermis primordium;                    | FBgn0015903 apt CG5393 LD45581        |                                     |
| embryonic inner optic lobe primordium;        | FBgn0003346 Sd CG9999 LD16356         |                                     |
|                                               | FBgn0010453 Wnt4 CG4698 RE26454       |                                     |

*continued on next page...*

| <i>Table 18 continued from previous page.</i> |                                                                                                                                                                                                                                                                                                                                                                                                                                                                                                                                                                                                                                                                                                                                                                                                                |
|-----------------------------------------------|----------------------------------------------------------------------------------------------------------------------------------------------------------------------------------------------------------------------------------------------------------------------------------------------------------------------------------------------------------------------------------------------------------------------------------------------------------------------------------------------------------------------------------------------------------------------------------------------------------------------------------------------------------------------------------------------------------------------------------------------------------------------------------------------------------------|
| Anatomical Structures                         | Genes                                                                                                                                                                                                                                                                                                                                                                                                                                                                                                                                                                                                                                                                                                                                                                                                          |
| salivary gland body primordium;               | FBgn0000659 fkh CG10002 RE03865                                                                                                                                                                                                                                                                                                                                                                                                                                                                                                                                                                                                                                                                                                                                                                                |
| sensory nervous system primordium;            | FBgn0040271 Sulf1 CG6725 LD03060<br>FBgn0013469 NULL CG12296 RE58581<br>FBgn0004868 Gdi CG4422 LD46767<br>FBgn0002932 neur CG11988 LD45505<br>FBgn0004595 pros CG17228 GH11848<br>FBgn0037947 CG6930 CG6930 RE72719<br>FBgn0003300 run CG1849 GH02614<br>FBgn0017453 Zn72D CG5215 GH12756                                                                                                                                                                                                                                                                                                                                                                                                                                                                                                                      |
| embryonic hindgut;                            | FBgn0040271 Sulf1 CG6725 LD03060<br>FBgn0004868 Gdi CG4422 LD46767<br>FBgn0040230 dbo CG6224 RE13447<br>FBgn0037811 CG12592 CG12592 AT09724<br>FBgn0005677 dac CG4952 RE64054<br>FBgn0000659 fkh CG10002 RE03865<br>FBgn0017453 Zn72D CG5215 GH12756<br>FBgn0038150 yellow-e3 CG17045 RE14803<br>FBgn0010453 Wnt4 CG4698 RE26454                                                                                                                                                                                                                                                                                                                                                                                                                                                                               |
| embryonic anal pad;                           | FBgn0000659 fkh CG10002 RE03865                                                                                                                                                                                                                                                                                                                                                                                                                                                                                                                                                                                                                                                                                                                                                                                |
| ventral nerve cord;                           | FBgn0040271 Sulf1 CG6725 LD03060<br>FBgn0024332 Mcm3 CG4206 LD07144<br>FBgn0013469 NULL CG12296 RE58581<br>FBgn0004868 Gdi CG4422 LD46767<br>FBgn0002932 neur CG11988 LD45505<br>FBgn0035542 CG11347 CG11347 GH28550<br>FBgn0040271 Sulf1 CG6725 SD04414<br>FBgn0004595 pros CG17228 GH11848<br>FBgn0040230 dbo CG6224 RE13447<br>FBgn0037947 CG6930 CG6930 RE72719<br>FBgn0037811 CG12592 CG12592 AT09724<br>FBgn0005677 dac CG4952 RE64054<br>FBgn0003300 run CG1849 GH02614<br>FBgn0004584 Rrp1 CG3178 LP05366<br>FBgn0015903 apt CG5393 LD45581<br>FBgn0033992 CG11798 CG11798 LD23883<br>FBgn0000611 exd CG8933 LD03509<br>FBgn0030507 CG11164 CG11164 RE50056<br>FBgn0034878 CG3941 CG3941 LD15650<br>FBgn0000577 en CG9015 LD16125<br>FBgn0003346 Sd CG9999 LD16356<br>FBgn0017453 Zn72D CG5215 GH12756 |

*continued on next page...*

| <i>Table 18 continued from previous page.</i> |                                       |
|-----------------------------------------------|---------------------------------------|
| Anatomical Structures                         | Genes                                 |
| visual primordium;                            | FBgn0004567 slp2 CG2939 RE11345       |
|                                               | FBgn0036786 skl CG13701 RE14076       |
|                                               | FBgn0035186 CG13912 CG13912 RE20371   |
|                                               | FBgn0010453 Wnt4 CG4698 RE26454       |
|                                               | FBgn0029512 Aos1 CG12276 LD33652      |
|                                               | FBgn0034878 CG3941 CG3941 LD15650     |
|                                               | FBgn0000577 en CG9015 LD16125         |
|                                               | FBgn0002932 neur CG11988 LD45505      |
|                                               | FBgn0004595 pros CG17228 GH11848      |
|                                               | FBgn0002561 l(1)sc CG3839 RE59335     |
|                                               | FBgn0015903 apt CG5393 LD45581        |
|                                               | FBgn0033992 CG11798 CG11798 LD23883   |
|                                               | FBgn0000611 exd CG8933 LD03509        |
| FBgn0003346 Sd CG9999 LD16356                 |                                       |
| FBgn0036786 skl CG13701 RE14076               |                                       |
| FBgn0035186 CG13912 CG13912 RE20371           |                                       |
| FBgn0010453 Wnt4 CG4698 RE26454               |                                       |
| FBgn0013725 phyl CG10108 RH04401              |                                       |
| foregut primordium;                           | FBgn0039211 CG13620 CG13620 SD03914   |
|                                               | FBgn0000659 fkh CG10002 RE03865       |
|                                               | FBgn0036786 skl CG13701 RE14076       |
|                                               | FBgn0038150 yellow-e3 CG17045 RE14803 |
|                                               | FBgn0010453 Wnt4 CG4698 RE26454       |
| crystal cell;                                 | FBgn0031971 CG7224 CG7224 GH18422     |
| embryonic leading edge cell specific anlage;  | FBgn0010453 Wnt4 CG4698 RE26454       |
| embryonic ventral epidermis;                  | FBgn0004868 Gdi CG4422 LD46767        |
|                                               | FBgn0040230 dbo CG6224 RE13447        |
|                                               | FBgn0037947 CG6930 CG6930 RE72719     |
|                                               | FBgn0015773 NetA CG18657 RE11206      |
|                                               | FBgn0004567 slp2 CG2939 RE11345       |
|                                               | FBgn0038150 yellow-e3 CG17045 RE14803 |
|                                               | FBgn0035186 CG13912 CG13912 RE20371   |
| lateral cord neuron;                          | FBgn0024332 Mm3 CG4206 LD07144        |
|                                               | FBgn0013469 NULL CG12296 RE58581      |
|                                               | FBgn0036494 Toll-6 CG7250 LD08841     |
|                                               | FBgn0004868 Gdi CG4422 LD46767        |
|                                               | FBgn0002932 neur CG11988 LD45505      |
|                                               | FBgn0035542 CG11347 CG11347 GH28550   |
|                                               | FBgn0040271 Sulf1 CG6725 SD04414      |
|                                               | FBgn0040230 dbo CG6224 RE13447        |

*continued on next page...*



| <i>Table 18 continued from previous page.</i> |                                                                                                                                                                                                                                                                                                                                                                                                                                                                                                                                                                                          |
|-----------------------------------------------|------------------------------------------------------------------------------------------------------------------------------------------------------------------------------------------------------------------------------------------------------------------------------------------------------------------------------------------------------------------------------------------------------------------------------------------------------------------------------------------------------------------------------------------------------------------------------------------|
| Anatomical Structures                         | Genes                                                                                                                                                                                                                                                                                                                                                                                                                                                                                                                                                                                    |
|                                               | FBgn0037947 CG6930 CG6930 RE72719<br>FBgn0037811 CG12592 CG12592 AT09724<br>FBgn0005677 dac CG4952 RE64054<br>FBgn0004584 Rrp1 CG3178 LP05366<br>FBgn0033992 CG11798 CG11798 LD23883<br>FBgn0000611 exd CG8933 LD03509<br>FBgn0034878 CG3941 CG3941 LD15650<br>FBgn0000577 en CG9015 LD16125<br>FBgn0038118 NULL CG7855 RE03551<br>FBgn0017453 Zn72D CG5215 GH12756<br>FBgn0015773 NetA CG18657 RE11206<br>FBgn0010453 Wnt4 CG4698 RE26454<br>FBgn0013725 phyl CG10108 RH04401<br>FBgn0029512 Aos1 CG12276 LD33652<br>FBgn0034878 CG3941 CG3941 LD15650<br>FBgn0000577 en CG9015 LD16125 |
| mesectoderm anlage;                           | FBgn0002932 neur CG11988 LD45505<br>FBgn0033992 CG11798 CG11798 LD23883<br>FBgn0000611 exd CG8933 LD03509<br>FBgn0000577 en CG9015 LD16125<br>FBgn0003346 Sd CG9999 LD16356<br>FBgn0000577 en CG9015 LD16125                                                                                                                                                                                                                                                                                                                                                                             |
| visceral muscle primordium;                   | FBgn0035542 CG11347 CG11347 GH28550<br>FBgn0033992 CG11798 CG11798 LD23883<br>FBgn0015773 NetA CG18657 RE11206<br>FBgn0031971 CG7224 CG7224 GH18422                                                                                                                                                                                                                                                                                                                                                                                                                                      |
| amnioserosa;                                  | FBgn0035542 CG11347 CG11347 GH28550<br>FBgn0000659 fkh CG10002 RE03865                                                                                                                                                                                                                                                                                                                                                                                                                                                                                                                   |
| embryonic optic lobe;                         | FBgn0033992 CG11798 CG11798 LD23883<br>FBgn0036786 skl CG13701 RE14076<br>FBgn0035186 CG13912 CG13912 RE20371<br>FBgn0010453 Wnt4 CG4698 RE26454                                                                                                                                                                                                                                                                                                                                                                                                                                         |
| embryonic/larval pericardial cell;            | FBgn0015903 apt CG5393 LD45581                                                                                                                                                                                                                                                                                                                                                                                                                                                                                                                                                           |
| embryonic dorsal epidermis;                   | FBgn0004868 Gdi CG4422 LD46767<br>FBgn0035542 CG11347 CG11347 GH28550<br>FBgn0037947 CG6930 CG6930 RE72719<br>FBgn0000577 en CG9015 LD16125<br>FBgn0015773 NetA CG18657 RE11206<br>FBgn0038150 yellow-e3 CG17045 RE14803<br>FBgn0035186 CG13912 CG13912 RE20371                                                                                                                                                                                                                                                                                                                          |
|                                               | <i>continued on next page...</i>                                                                                                                                                                                                                                                                                                                                                                                                                                                                                                                                                         |

| <i>Table 18 continued from previous page.</i> |                                       |
|-----------------------------------------------|---------------------------------------|
| Anatomical Structures                         | Genes                                 |
| gnathal primordium;                           | FBgn0000577 en CG9015 LD16125         |
|                                               | FBgn0015903 apt CG5393 LD45581        |
|                                               | FBgn0000577 en CG9015 LD16125         |
|                                               | FBgn0036786 skl CG13701 RE14076       |
|                                               | FBgn0010453 Wnt4 CG4698 RE26454       |
|                                               | FBgn0000577 en CG9015 LD16125         |
| posterior spiracle specific anlage;           |                                       |
| head mesoderm P2 primordium;                  | FBgn0039211 CG13620 CG13620 SD03914   |
|                                               | FBgn0033992 CG11798 CG11798 LD23883   |
|                                               | FBgn0000611 exd CG8933 LD03509        |
|                                               | FBgn0003346 Sd CG9999 LD16356         |
|                                               | FBgn0015773 NetA CG18657 RE11206      |
| anterior midgut primordium;                   |                                       |
|                                               | FBgn0037811 CG12592 CG12592 AT09724   |
|                                               | FBgn0000659 fkh CG10002 RE03865       |
|                                               | FBgn0017453 Zn72D CG5215 GH12756      |
| clypeo-labral primordium;                     |                                       |
|                                               | FBgn0040230 dbo CG6224 RE13447        |
|                                               | FBgn0005677 dac CG4952 RE64054        |
|                                               | FBgn0015903 apt CG5393 LD45581        |
|                                               | FBgn0000577 en CG9015 LD16125         |
|                                               | FBgn0004567 slp2 CG2939 RE11345       |
|                                               | FBgn0036786 skl CG13701 RE14076       |
|                                               | FBgn0038150 yellow-e3 CG17045 RE14803 |
|                                               | FBgn0010453 Wnt4 CG4698 RE26454       |
|                                               | FBgn0000577 en CG9015 LD16125         |
| cardiac mesoderm primordium;                  |                                       |
|                                               | FBgn0033992 CG11798 CG11798 LD23883   |
| maxillary sensory complex primordium;         |                                       |
|                                               | FBgn0004595 pros CG17228 GH11848      |
| embryonic ganglion mother cell;               |                                       |
|                                               | FBgn0024332 Mcm3 CG4206 LD07144       |
|                                               | FBgn0013469 NULL CG12296 RE58581      |
|                                               | FBgn0002932 neur CG11988 LD45505      |
|                                               | FBgn0004595 pros CG17228 GH11848      |
|                                               | FBgn0030507 CG11164 CG11164 RE50056   |
|                                               | FBgn0034878 CG3941 CG3941 LD15650     |
|                                               | FBgn0035186 CG13912 CG13912 RE20371   |
|                                               | FBgn0010453 Wnt4 CG4698 RE26454       |
|                                               | FBgn0034878 CG3941 CG3941 LD15650     |
| embryonic salivary gland body;                |                                       |
|                                               | FBgn0000659 fkh CG10002 RE03865       |
| embryonic large intestine;                    |                                       |
|                                               | FBgn0040230 dbo CG6224 RE13447        |

*continued on next page...*

| <i>Table 18 continued from previous page.</i> |                                                                                                                                                                                                                                                                                          |
|-----------------------------------------------|------------------------------------------------------------------------------------------------------------------------------------------------------------------------------------------------------------------------------------------------------------------------------------------|
| Anatomical Structures                         | Genes                                                                                                                                                                                                                                                                                    |
| germ cell;                                    | FBgn0005677 dac CG4952 RE64054<br>FBgn0000577 en CG9015 LD16125<br>FBgn0000659 fkh CG10002 RE03865<br>FBgn0010453 Wnt4 CG4698 RE26454<br>FBgn0000577 en CG9015 LD16125                                                                                                                   |
| embryonic esophagus;                          | FBgn0037811 CG12592 CG12592 AT09724                                                                                                                                                                                                                                                      |
| embryonic epipharynx;                         | FBgn0004868 Gdi CG4422 LD46767<br>FBgn0000659 fkh CG10002 RE03865<br>FBgn0038150 yellow-e3 CG17045 RE14803<br>FBgn0010453 Wnt4 CG4698 RE26454                                                                                                                                            |
| gonad;                                        | FBgn0004868 Gdi CG4422 LD46767<br>FBgn0015903 apt CG5393 LD45581<br>FBgn0039211 CG13620 CG13620 SD03914<br>FBgn0000577 en CG9015 LD16125<br>FBgn0004567 slp2 CG2939 RE11345<br>FBgn0038150 yellow-e3 CG17045 RE14803<br>FBgn0010453 Wnt4 CG4698 RE26454<br>FBgn0000577 en CG9015 LD16125 |
| embryonic maxillary sensory complex;          | FBgn0037811 CG12592 CG12592 AT09724<br>FBgn0004584 Rrp1 CG3178 LP05366<br>FBgn0034878 CG3941 CG3941 LD15650<br>FBgn0017453 Zn72D CG5215 GH12756<br>FBgn0029512 Aos1 CG12276 LD33652<br>FBgn0034878 CG3941 CG3941 LD15650                                                                 |
| head mesoderm anlage;                         | FBgn0004868 Gdi CG4422 LD46767<br>FBgn0004595 pros CG17228 GH11848                                                                                                                                                                                                                       |
| embryonic leading edge cell;                  | FBgn0024332 Mcm3 CG4206 LD07144<br>FBgn0002932 neur CG11988 LD45505<br>FBgn0033992 CG11798 CG11798 LD23883<br>FBgn0000611 exd CG8933 LD03509<br>FBgn0003346 Sd CG9999 LD16356<br>FBgn0015773 NetA CG18657 RE11206<br>FBgn0035186 CG13912 CG13912 RE20371                                 |
| embryonic proventriculus;                     | FBgn0004595 pros CG17228 GH11848                                                                                                                                                                                                                                                         |
|                                               | FBgn0004868 Gdi CG4422 LD46767<br>FBgn0000659 fkh CG10002 RE03865<br>FBgn0015773 NetA CG18657 RE11206<br>FBgn0010453 Wnt4 CG4698 RE26454                                                                                                                                                 |

*continued on next page...*

| <i>Table 18 continued from previous page.</i> |                                                                                                                                                                                                                                                                                                                                                                                                                                                                                         |
|-----------------------------------------------|-----------------------------------------------------------------------------------------------------------------------------------------------------------------------------------------------------------------------------------------------------------------------------------------------------------------------------------------------------------------------------------------------------------------------------------------------------------------------------------------|
| Anatomical Structures                         | Genes                                                                                                                                                                                                                                                                                                                                                                                                                                                                                   |
| dorsal ectoderm primordium;                   | FBgn0040271 Sulf1 CG6725 LD03060<br>FBgn0036494 Toll-6 CG7250 LD08841<br>FBgn0035542 CG11347 CG11347 GH28550<br>FBgn0040271 Sulf1 CG6725 SD04414<br>FBgn0037811 CG12592 CG12592 AT09724<br>FBgn0003300 run CG1849 GH02614<br>FBgn0015903 apt CG5393 LD45581<br>FBgn0033992 CG11798 CG11798 LD23883<br>FBgn0000611 exd CG8933 LD03509<br>FBgn0003346 Sd CG9999 LD16356<br>FBgn0038150 yellow-e3 CG17045 RE14803<br>FBgn0013725 phyl CG10108 RH04401                                      |
| dorsal epidermis primordium;                  | FBgn0040271 Sulf1 CG6725 LD03060<br>FBgn0013469 NULL CG12296 RE58581<br>FBgn0036494 Toll-6 CG7250 LD08841<br>FBgn0035542 CG11347 CG11347 GH28550<br>FBgn0040271 Sulf1 CG6725 SD04414<br>FBgn0037947 CG6930 CG6930 RE72719<br>FBgn0037811 CG12592 CG12592 AT09724<br>FBgn0033992 CG11798 CG11798 LD23883<br>FBgn0000611 exd CG8933 LD03509<br>FBgn0000577 en CG9015 LD16125<br>FBgn0038150 yellow-e3 CG17045 RE14803<br>FBgn0010453 Wnt4 CG4698 RE26454<br>FBgn0000577 en CG9015 LD16125 |
| embryonic stomatogastric nervous system;      | FBgn0002561 l(1)sc CG3839 RE59335<br>FBgn0000659 fkh CG10002 RE03865<br>FBgn0013725 phyl CG10108 RH04401                                                                                                                                                                                                                                                                                                                                                                                |
| embryonic/larval somatic muscle;              | FBgn0040271 Sulf1 CG6725 SD04414<br>FBgn0000611 exd CG8933 LD03509                                                                                                                                                                                                                                                                                                                                                                                                                      |
| embryonic central brain mushroom body;        | FBgn0037811 CG12592 CG12592 AT09724<br>FBgn0004584 Rrp1 CG3178 LP05366                                                                                                                                                                                                                                                                                                                                                                                                                  |
| embryonic salivary gland;                     | FBgn0000659 fkh CG10002 RE03865                                                                                                                                                                                                                                                                                                                                                                                                                                                         |
| ventral sensory complex specific anlage;      | FBgn0002932 neur CG11988 LD45505<br>FBgn0004595 pros CG17228 GH11848<br>FBgn0002561 l(1)sc CG3839 RE59335                                                                                                                                                                                                                                                                                                                                                                               |
| embryonic hypopharynx;                        | FBgn0004868 Gdi CG4422 LD46767<br>FBgn0015903 apt CG5393 LD45581                                                                                                                                                                                                                                                                                                                                                                                                                        |

*continued on next page...*

| <i>Table 18 continued from previous page.</i> |                                       |
|-----------------------------------------------|---------------------------------------|
| Anatomical Structures                         | Genes                                 |
| embryonic/larval dorsal vessel;               | FBgn0039211 CG13620 CG13620 SD03914   |
|                                               | FBgn0015903 apt CG5393 LD45581        |
| embryonic central brain pars intercerebralis; | FBgn0040271 Sulf1 CG6725 LD03060      |
|                                               | FBgn0040271 Sulf1 CG6725 SD04414      |
|                                               | FBgn0038118 NULL CG7855 RE03551       |
|                                               | FBgn0031971 CG7224 CG7224 GH18422     |
|                                               |                                       |
| embryonic central brain;                      | FBgn0040271 Sulf1 CG6725 LD03060      |
|                                               | FBgn0024332 Mcm3 CG4206 LD07144       |
|                                               | FBgn0013469 NULL CG12296 RE58581      |
|                                               | FBgn0036494 Toll-6 CG7250 LD08841     |
|                                               | FBgn0004868 Gdi CG4422 LD46767        |
|                                               | FBgn0002932 neur CG11988 LD45505      |
|                                               | FBgn0035542 CG11347 CG11347 GH28550   |
|                                               | FBgn0040271 Sulf1 CG6725 SD04414      |
|                                               | FBgn0004595 pros CG17228 GH11848      |
|                                               | FBgn0040230 dbo CG6224 RE13447        |
|                                               | FBgn0002561 l(1)sc CG3839 RE59335     |
|                                               | FBgn0037947 CG6930 CG6930 RE72719     |
|                                               | FBgn0037811 CG12592 CG12592 AT09724   |
|                                               | FBgn0005677 dac CG4952 RE64054        |
|                                               | FBgn0003300 run CG1849 GH02614        |
|                                               | FBgn0051670 CG31670 CG31670 GH14092   |
|                                               | FBgn0004584 Rrp1 CG3178 LP05366       |
|                                               | FBgn0015903 apt CG5393 LD45581        |
|                                               | FBgn0033992 CG11798 CG11798 LD23883   |
|                                               | FBgn0039211 CG13620 CG13620 SD03914   |
|                                               | FBgn0000611 exd CG8933 LD03509        |
|                                               | FBgn0030507 CG11164 CG11164 RE50056   |
|                                               | FBgn0034878 CG3941 CG3941 LD15650     |
|                                               | FBgn0000577 en CG9015 LD16125         |
|                                               | FBgn0003346 Sd CG9999 LD16356         |
|                                               | FBgn0038118 NULL CG7855 RE03551       |
|                                               | FBgn0000659 fkh CG10002 RE03865       |
|                                               | FBgn0017453 Zn72D CG5215 GH12756      |
|                                               | FBgn0015773 NetA CG18657 RE11206      |
|                                               | FBgn0004567 slp2 CG2939 RE11345       |
|                                               | FBgn0036786 skl CG13701 RE14076       |
|                                               | FBgn0038150 yellow-e3 CG17045 RE14803 |
|                                               | FBgn0035186 CG13912 CG13912 RE20371   |
| FBgn0010453 Wnt4 CG4698 RE26454               |                                       |
| FBgn0013725 phyl CG10108 RH04401              |                                       |
| FBgn0029512 Aos1 CG12276 LD33652              |                                       |
| FBgn0031971 CG7224 CG7224 GH18422             |                                       |

*continued on next page...*

| <i>Table 18 continued from previous page.</i>                        |                                                                                                                                                                                                                                                                                                                                                                                                                                                                                                                                                                                                                                                                                                                                                                                                                               |
|----------------------------------------------------------------------|-------------------------------------------------------------------------------------------------------------------------------------------------------------------------------------------------------------------------------------------------------------------------------------------------------------------------------------------------------------------------------------------------------------------------------------------------------------------------------------------------------------------------------------------------------------------------------------------------------------------------------------------------------------------------------------------------------------------------------------------------------------------------------------------------------------------------------|
| Anatomical Structures                                                | Genes                                                                                                                                                                                                                                                                                                                                                                                                                                                                                                                                                                                                                                                                                                                                                                                                                         |
| salivary gland body specific anlage;<br>ventral ectoderm primordium; | FBgn0051670 CG31670 CG31670 GH14092<br>FBgn0034878 CG3941 CG3941 LD15650<br>FBgn0000577 en CG9015 LD16125                                                                                                                                                                                                                                                                                                                                                                                                                                                                                                                                                                                                                                                                                                                     |
|                                                                      | FBgn0000659 fkh CG10002 RE03865<br><br>FBgn0036494 Toll-6 CG7250 LD08841<br>FBgn0035542 CG11347 CG11347 GH28550<br>FBgn0040230 dbo CG6224 RE13447<br>FBgn0037947 CG6930 CG6930 RE72719<br>FBgn0037811 CG12592 CG12592 AT09724<br>FBgn0003300 run CG1849 GH02614<br>FBgn0015903 apt CG5393 LD45581<br>FBgn0033992 CG11798 CG11798 LD23883<br>FBgn0000611 exd CG8933 LD03509<br>FBgn0030507 CG11164 CG11164 RE50056<br>FBgn0000577 en CG9015 LD16125<br>FBgn0003346 Sd CG9999 LD16356<br>FBgn0004567 slp2 CG2939 RE11345<br>FBgn0035186 CG13912 CG13912 RE20371<br>FBgn0010453 Wnt4 CG4698 RE26454<br>FBgn0013725 phyl CG10108 RH04401<br>FBgn0000577 en CG9015 LD16125                                                                                                                                                         |
| embryonic central brain neuron;                                      | FBgn0024332 Mcm3 CG4206 LD07144<br>FBgn0002932 neur CG11988 LD45505<br>FBgn0035542 CG11347 CG11347 GH28550<br>FBgn0040230 dbo CG6224 RE13447<br>FBgn0037947 CG6930 CG6930 RE72719<br>FBgn0037811 CG12592 CG12592 AT09724<br>FBgn0051670 CG31670 CG31670 GH14092<br>FBgn0004584 Rrp1 CG3178 LP05366<br>FBgn0033992 CG11798 CG11798 LD23883<br>FBgn0039211 CG13620 CG13620 SD03914<br>FBgn0000611 exd CG8933 LD03509<br>FBgn0000577 en CG9015 LD16125<br>FBgn0038118 NULL CG7855 RE03551<br>FBgn0017453 Zn72D CG5215 GH12756<br>FBgn0015773 NetA CG18657 RE11206<br>FBgn0036786 skl CG13701 RE14076<br>FBgn0038150 yellow-e3 CG17045 RE14803<br>FBgn0010453 Wnt4 CG4698 RE26454<br>FBgn0013725 phyl CG10108 RH04401<br>FBgn0029512 Aos1 CG12276 LD33652<br>FBgn0051670 CG31670 CG31670 GH14092<br>FBgn0000577 en CG9015 LD16125 |
| <i>continued on next page...</i>                                     |                                                                                                                                                                                                                                                                                                                                                                                                                                                                                                                                                                                                                                                                                                                                                                                                                               |

| <i>Table 18 continued from previous page.</i> |                                                                                                                                                                                                                                                                                                                                                                                                                                                                                                           |
|-----------------------------------------------|-----------------------------------------------------------------------------------------------------------------------------------------------------------------------------------------------------------------------------------------------------------------------------------------------------------------------------------------------------------------------------------------------------------------------------------------------------------------------------------------------------------|
| Anatomical Structures                         | Genes                                                                                                                                                                                                                                                                                                                                                                                                                                                                                                     |
| embryonic labial sensory complex;             | FBgn0004868 Gdi CG4422 LD46767<br>FBgn0004595 pros CG17228 GH11848                                                                                                                                                                                                                                                                                                                                                                                                                                        |
| visual anlage;                                | FBgn0015903 apt CG5393 LD45581<br>FBgn0033992 CG11798 CG11798 LD23883<br>FBgn0000611 exd CG8933 LD03509<br>FBgn0003346 Sd CG9999 LD16356<br>FBgn0035186 CG13912 CG13912 RE20371                                                                                                                                                                                                                                                                                                                           |
| Malpighian tubule main body primordium;       | FBgn0000659 fkh CG10002 RE03865                                                                                                                                                                                                                                                                                                                                                                                                                                                                           |
| inclusive hindgut primordium;                 | FBgn0004868 Gdi CG4422 LD46767<br>FBgn0040230 dbo CG6224 RE13447<br>FBgn0037811 CG12592 CG12592 AT09724<br>FBgn0003300 run CG1849 GH02614<br>FBgn0051670 CG31670 CG31670 GH14092<br>FBgn0015903 apt CG5393 LD45581<br>FBgn0000611 exd CG8933 LD03509<br>FBgn0000577 en CG9015 LD16125<br>FBgn0003346 Sd CG9999 LD16356<br>FBgn0000659 fkh CG10002 RE03865<br>FBgn0036786 skl CG13701 RE14076<br>FBgn0031971 CG7224 CG7224 GH18422<br>FBgn0051670 CG31670 CG31670 GH14092<br>FBgn0000577 en CG9015 LD16125 |
| foregut anlage;                               | FBgn0002932 neur CG11988 LD45505<br>FBgn0015903 apt CG5393 LD45581<br>FBgn0000611 exd CG8933 LD03509<br>FBgn0003346 Sd CG9999 LD16356<br>FBgn0000659 fkh CG10002 RE03865<br>FBgn0035186 CG13912 CG13912 RE20371<br>FBgn0010453 Wnt4 CG4698 RE26454                                                                                                                                                                                                                                                        |
| somatic muscle primordium;                    | FBgn0040271 Sulf1 CG6725 SD04414<br>FBgn0002561 l(1)sc CG3839 RE59335<br>FBgn0033992 CG11798 CG11798 LD23883<br>FBgn0000577 en CG9015 LD16125<br>FBgn0000577 en CG9015 LD16125                                                                                                                                                                                                                                                                                                                            |
| lateral cord surface glia;                    | FBgn0002932 neur CG11988 LD45505<br>FBgn0004584 Rrp1 CG3178 LP05366<br>FBgn0038118 NULL CG7855 RE03551                                                                                                                                                                                                                                                                                                                                                                                                    |
| need new term(sensory system head);           | FBgn0035542 CG11347 CG11347 GH28550                                                                                                                                                                                                                                                                                                                                                                                                                                                                       |

*continued on next page...*

| <i>Table 18 continued from previous page.</i> |                                                                                                                                                                                                                                                                                                                                                                                                                                                                                                                                                                                                                                                                |
|-----------------------------------------------|----------------------------------------------------------------------------------------------------------------------------------------------------------------------------------------------------------------------------------------------------------------------------------------------------------------------------------------------------------------------------------------------------------------------------------------------------------------------------------------------------------------------------------------------------------------------------------------------------------------------------------------------------------------|
| Anatomical Structures                         | Genes                                                                                                                                                                                                                                                                                                                                                                                                                                                                                                                                                                                                                                                          |
| stomatogastric nervous system primordium;     | FBgn0004595 pros CG17228 GH11848<br>FBgn0033992 CG11798 CG11798 LD23883<br>FBgn0017453 Zn72D CG5215 GH12756                                                                                                                                                                                                                                                                                                                                                                                                                                                                                                                                                    |
| embryonic/larval posterior spiracle;          | FBgn0002561 l(1)sc CG3839 RE59335<br>FBgn0000659 fkh CG10002 RE03865<br>FBgn0013725 phyl CG10108 RH04401                                                                                                                                                                                                                                                                                                                                                                                                                                                                                                                                                       |
| sensory nervous system specific anlage;       | FBgn0039211 CG13620 CG13620 SD03914                                                                                                                                                                                                                                                                                                                                                                                                                                                                                                                                                                                                                            |
| ventral ectoderm anlage;                      | FBgn0040271 Sulf1 CG6725 LD03060<br>FBgn0002932 neur CG11988 LD45505<br>FBgn0004595 pros CG17228 GH11848<br>FBgn0002561 l(1)sc CG3839 RE59335<br>FBgn0017453 Zn72D CG5215 GH12756<br>FBgn0035186 CG13912 CG13912 RE20371<br>FBgn0013725 phyl CG10108 RH04401                                                                                                                                                                                                                                                                                                                                                                                                   |
| embryonic/larval visceral muscle;             | FBgn0036494 Toll-6 CG7250 LD08841<br>FBgn0002932 neur CG11988 LD45505<br>FBgn0004595 pros CG17228 GH11848<br>FBgn0040230 dbo CG6224 RE13447<br>FBgn0002561 l(1)sc CG3839 RE59335<br>FBgn0037947 CG6930 CG6930 RE72719<br>FBgn0037811 CG12592 CG12592 AT09724<br>FBgn0003300 run CG1849 GH02614<br>FBgn0015903 apt CG5393 LD45581<br>FBgn0033992 CG11798 CG11798 LD23883<br>FBgn0000611 exd CG8933 LD03509<br>FBgn0000577 en CG9015 LD16125<br>FBgn0003346 Sd CG9999 LD16356<br>FBgn0038118 NULL CG7855 RE03551<br>FBgn0035186 CG13912 CG13912 RE20371<br>FBgn0010453 Wnt4 CG4698 RE26454<br>FBgn0031971 CG7224 CG7224 GH18422<br>FBgn0000577 en CG9015 LD16125 |
| ventral midline glia;                         | FBgn0000611 exd CG8933 LD03509<br>FBgn0015773 NetA CG18657 RE11206<br>FBgn0004567 slp2 CG2939 RE11345                                                                                                                                                                                                                                                                                                                                                                                                                                                                                                                                                          |
| pars intercerebralis primordium;              | FBgn0035542 CG11347 CG11347 GH28550                                                                                                                                                                                                                                                                                                                                                                                                                                                                                                                                                                                                                            |
|                                               | FBgn0040271 Sulf1 CG6725 LD03060<br>FBgn0040271 Sulf1 CG6725 SD04414<br>FBgn0038118 NULL CG7855 RE03551                                                                                                                                                                                                                                                                                                                                                                                                                                                                                                                                                        |

*continued on next page...*



| <i>Table 18 continued from previous page.</i> |                                       |
|-----------------------------------------------|---------------------------------------|
| Anatomical Structures                         | Genes                                 |
| embryonic dorsal pouch;                       | FBgn0031971 CG7224 CG7224 GH18422     |
|                                               | FBgn0040230 dbo CG6224 RE13447        |
|                                               | FBgn0015903 apt CG5393 LD45581        |
|                                               | FBgn0039211 CG13620 CG13620 SD03914   |
| embryonic head epidermis;                     | FBgn0004868 Gdi CG4422 LD46767        |
|                                               | FBgn0035542 CG11347 CG11347 GH28550   |
|                                               | FBgn0040230 dbo CG6224 RE13447        |
|                                               | FBgn0033992 CG11798 CG11798 LD23883   |
|                                               | FBgn0039211 CG13620 CG13620 SD03914   |
|                                               | FBgn0000577 en CG9015 LD16125         |
|                                               | FBgn0000659 fkh CG10002 RE03865       |
|                                               | FBgn0017453 Zn72D CG5215 GH12756      |
|                                               | FBgn0015773 NetA CG18657 RE11206      |
|                                               | FBgn0000577 en CG9015 LD16125         |
|                                               | lymph gland;                          |
| FBgn0038118 NULL CG7855 RE03551               |                                       |
| embryonic foregut;                            | FBgn0004868 Gdi CG4422 LD46767        |
|                                               | FBgn0015903 apt CG5393 LD45581        |
|                                               | FBgn0039211 CG13620 CG13620 SD03914   |
|                                               | FBgn0000659 fkh CG10002 RE03865       |
|                                               | FBgn0038150 yellow-e3 CG17045 RE14803 |
|                                               | FBgn0010453 Wnt4 CG4698 RE26454       |
| embryonic central nervous system;             | FBgn0040271 Sulf1 CG6725 LD03060      |
|                                               | FBgn0024332 Mcm3 CG4206 LD07144       |
|                                               | FBgn0036494 Toll-6 CG7250 LD08841     |
|                                               | FBgn0004868 Gdi CG4422 LD46767        |
|                                               | FBgn0002932 neur CG11988 LD45505      |
|                                               | FBgn0035542 CG11347 CG11347 GH28550   |
|                                               | FBgn0040271 Sulf1 CG6725 SD04414      |
|                                               | FBgn0004595 pros CG17228 GH11848      |
|                                               | FBgn0040230 dbo CG6224 RE13447        |
|                                               | FBgn0002561 l(1)sc CG3839 RE59335     |
|                                               | FBgn0037947 CG6930 CG6930 RE72719     |
|                                               | FBgn0037811 CG12592 CG12592 AT09724   |
|                                               | FBgn0005677 dac CG4952 RE64054        |
|                                               | FBgn0003300 run CG1849 GH02614        |
|                                               | FBgn0051670 CG31670 CG31670 GH14092   |
|                                               | FBgn0004584 Rrp1 CG3178 LP05366       |
|                                               | FBgn0015903 apt CG5393 LD45581        |
|                                               | FBgn0033992 CG11798 CG11798 LD23883   |
|                                               | FBgn0039211 CG13620 CG13620 SD03914   |

*continued on next page...*

| <i>Table 18 continued from previous page.</i> |                                                                                                                                                                                                                                                                                                                                                                                                                                                                                                                                                                                       |
|-----------------------------------------------|---------------------------------------------------------------------------------------------------------------------------------------------------------------------------------------------------------------------------------------------------------------------------------------------------------------------------------------------------------------------------------------------------------------------------------------------------------------------------------------------------------------------------------------------------------------------------------------|
| Anatomical Structures                         | Genes                                                                                                                                                                                                                                                                                                                                                                                                                                                                                                                                                                                 |
|                                               | FBgn0000611 exd CG8933 LD03509<br>FBgn0034878 CG3941 CG3941 LD15650<br>FBgn0000577 en CG9015 LD16125<br>FBgn0003346 Sd CG9999 LD16356<br>FBgn0038118 NULL CG7855 RE03551<br>FBgn0000659 fkh CG10002 RE03865<br>FBgn0017453 Zn72D CG5215 GH12756<br>FBgn0004567 slp2 CG2939 RE11345<br>FBgn0036786 skl CG13701 RE14076<br>FBgn0035186 CG13912 CG13912 RE20371<br>FBgn0010453 Wnt4 CG4698 RE26454<br>FBgn0029512 Aos1 CG12276 LD33652<br>FBgn0031971 CG7224 CG7224 GH18422<br>FBgn0051670 CG31670 CG31670 GH14092<br>FBgn0034878 CG3941 CG3941 LD15650<br>FBgn0000577 en CG9015 LD16125 |
| embryonic main segment of Malpighian tubule;  |                                                                                                                                                                                                                                                                                                                                                                                                                                                                                                                                                                                       |
| tracheal primordium;                          | FBgn0000659 fkh CG10002 RE03865                                                                                                                                                                                                                                                                                                                                                                                                                                                                                                                                                       |
|                                               | FBgn0037811 CG12592 CG12592 AT09724<br>FBgn0015903 apt CG5393 LD45581<br>FBgn0039211 CG13620 CG13620 SD03914                                                                                                                                                                                                                                                                                                                                                                                                                                                                          |
| procephalic neuroblasts;                      |                                                                                                                                                                                                                                                                                                                                                                                                                                                                                                                                                                                       |
|                                               | FBgn0024332 Mcm3 CG4206 LD07144<br>FBgn0013469 NULL CG12296 RE58581<br>FBgn0040271 Sulf1 CG6725 SD04414<br>FBgn0004595 pros CG17228 GH11848<br>FBgn0040230 dbo CG6224 RE13447<br>FBgn0002561 l(1)sc CG3839 RE59335<br>FBgn0005677 dac CG4952 RE64054<br>FBgn0033992 CG11798 CG11798 LD23883<br>FBgn0034878 CG3941 CG3941 LD15650<br>FBgn0035186 CG13912 CG13912 RE20371<br>FBgn0010453 Wnt4 CG4698 RE26454<br>FBgn0034878 CG3941 CG3941 LD15650                                                                                                                                       |
| embryonic small intestine;                    |                                                                                                                                                                                                                                                                                                                                                                                                                                                                                                                                                                                       |
|                                               | FBgn0040271 Sulf1 CG6725 LD03060<br>FBgn0000659 fkh CG10002 RE03865<br>FBgn0010453 Wnt4 CG4698 RE26454                                                                                                                                                                                                                                                                                                                                                                                                                                                                                |
| rectum specific anlage;                       |                                                                                                                                                                                                                                                                                                                                                                                                                                                                                                                                                                                       |
| embryonic brain;                              | FBgn0000659 fkh CG10002 RE03865                                                                                                                                                                                                                                                                                                                                                                                                                                                                                                                                                       |
|                                               | FBgn0024332 Mcm3 CG4206 LD07144<br>FBgn0013469 NULL CG12296 RE58581<br>FBgn0036494 Toll-6 CG7250 LD08841<br>FBgn0004868 Gdi CG4422 LD46767                                                                                                                                                                                                                                                                                                                                                                                                                                            |

*continued on next page...*

Table 18 continued from previous page.

| Anatomical Structures          | Genes                                                                                                                                                                                                                                                                                                                                                                                                                                                                                                                                                                                                                                                                                                                                                                     |
|--------------------------------|---------------------------------------------------------------------------------------------------------------------------------------------------------------------------------------------------------------------------------------------------------------------------------------------------------------------------------------------------------------------------------------------------------------------------------------------------------------------------------------------------------------------------------------------------------------------------------------------------------------------------------------------------------------------------------------------------------------------------------------------------------------------------|
|                                | FBgn0035542 CG11347 CG11347 GH28550<br>FBgn0040271 Sulf1 CG6725 SD04414<br>FBgn0040230 dbo CG6224 RE13447<br>FBgn0005677 dac CG4952 RE64054<br>FBgn0003300 run CG1849 GH02614<br>FBgn0015903 apt CG5393 LD45581<br>FBgn0033992 CG11798 CG11798 LD23883<br>FBgn0039211 CG13620 CG13620 SD03914<br>FBgn0000611 exd CG8933 LD03509<br>FBgn0034878 CG3941 CG3941 LD15650<br>FBgn0000577 en CG9015 LD16125<br>FBgn0038118 NULL CG7855 RE03551<br>FBgn0000659 fkh CG10002 RE03865<br>FBgn0017453 Zn72D CG5215 GH12756<br>FBgn0004567 slp2 CG2939 RE11345<br>FBgn0036786 skl CG13701 RE14076<br>FBgn0035186 CG13912 CG13912 RE20371<br>FBgn0010453 Wnt4 CG4698 RE26454<br>FBgn0029512 Aos1 CG12276 LD33652<br>FBgn0034878 CG3941 CG3941 LD15650<br>FBgn0000577 en CG9015 LD16125 |
| trunk mesoderm anlage;         |                                                                                                                                                                                                                                                                                                                                                                                                                                                                                                                                                                                                                                                                                                                                                                           |
|                                | FBgn0024332 Mcm3 CG4206 LD07144<br>FBgn0002932 neur CG11988 LD45505<br>FBgn0037947 CG6930 CG6930 RE72719<br>FBgn0033992 CG11798 CG11798 LD23883<br>FBgn0000611 exd CG8933 LD03509<br>FBgn0000577 en CG9015 LD16125<br>FBgn0003346 Sd CG9999 LD16356<br>FBgn0015773 NetA CG18657 RE11206<br>FBgn0035186 CG13912 CG13912 RE20371<br>FBgn0000577 en CG9015 LD16125                                                                                                                                                                                                                                                                                                                                                                                                           |
| anterior endoderm anlage;      |                                                                                                                                                                                                                                                                                                                                                                                                                                                                                                                                                                                                                                                                                                                                                                           |
|                                | FBgn0002932 neur CG11988 LD45505<br>FBgn0037947 CG6930 CG6930 RE72719<br>FBgn0015903 apt CG5393 LD45581<br>FBgn0000611 exd CG8933 LD03509<br>FBgn0003346 Sd CG9999 LD16356<br>FBgn0000659 fkh CG10002 RE03865<br>FBgn0035186 CG13912 CG13912 RE20371                                                                                                                                                                                                                                                                                                                                                                                                                                                                                                                      |
| embryonic Malpighian tubule;   |                                                                                                                                                                                                                                                                                                                                                                                                                                                                                                                                                                                                                                                                                                                                                                           |
|                                | FBgn0038118 NULL CG7855 RE03551<br>FBgn0000659 fkh CG10002 RE03865                                                                                                                                                                                                                                                                                                                                                                                                                                                                                                                                                                                                                                                                                                        |
| ventral nerve cord primordium; |                                                                                                                                                                                                                                                                                                                                                                                                                                                                                                                                                                                                                                                                                                                                                                           |
|                                | FBgn0040271 Sulf1 CG6725 LD03060<br>FBgn0024332 Mcm3 CG4206 LD07144                                                                                                                                                                                                                                                                                                                                                                                                                                                                                                                                                                                                                                                                                                       |

*continued on next page...*

| <i>Table 18 continued from previous page.</i> |                                     |
|-----------------------------------------------|-------------------------------------|
| Anatomical Structures                         | Genes                               |
|                                               | FBgn0013469 NULL CG12296 RE58581    |
|                                               | FBgn0036494 Toll-6 CG7250 LD08841   |
|                                               | FBgn0004868 Gdi CG4422 LD46767      |
|                                               | FBgn0002932 neur CG11988 LD45505    |
|                                               | FBgn0035542 CG11347 CG11347 GH28550 |
|                                               | FBgn0040271 Sulf1 CG6725 SD04414    |
|                                               | FBgn0004595 pros CG17228 GH11848    |
|                                               | FBgn0040230 dbo CG6224 RE13447      |
|                                               | FBgn0002561 l(1)sc CG3839 RE59335   |
|                                               | FBgn0037947 CG6930 CG6930 RE72719   |
|                                               | FBgn0037811 CG12592 CG12592 AT09724 |
|                                               | FBgn0003300 run CG1849 GH02614      |
|                                               | FBgn0004584 Rrp1 CG3178 LP05366     |
|                                               | FBgn0015903 apt CG5393 LD45581      |
|                                               | FBgn0033992 CG11798 CG11798 LD23883 |
|                                               | FBgn0000611 exd CG8933 LD03509      |
|                                               | FBgn0030507 CG11164 CG11164 RE50056 |
|                                               | FBgn0034878 CG3941 CG3941 LD15650   |
|                                               | FBgn0000577 en CG9015 LD16125       |
|                                               | FBgn0003346 Sd CG9999 LD16356       |
|                                               | FBgn0038118 NULL CG7855 RE03551     |
|                                               | FBgn0017453 Zn72D CG5215 GH12756    |
|                                               | FBgn0015773 NetA CG18657 RE11206    |
|                                               | FBgn0004567 slp2 CG2939 RE11345     |
|                                               | FBgn0035186 CG13912 CG13912 RE20371 |
|                                               | FBgn0010453 Wnt4 CG4698 RE26454     |
|                                               | FBgn0013725 phyl CG10108 RH04401    |
|                                               | FBgn0029512 Aos1 CG12276 LD33652    |
|                                               | FBgn0034878 CG3941 CG3941 LD15650   |
|                                               | FBgn0000577 en CG9015 LD16125       |
| atrium;                                       |                                     |
|                                               | FBgn0015903 apt CG5393 LD45581      |
|                                               | FBgn0000577 en CG9015 LD16125       |
|                                               | FBgn0000577 en CG9015 LD16125       |
| adult midgut precursor;                       |                                     |
|                                               | FBgn0004595 pros CG17228 GH11848    |
| lateral cord;                                 |                                     |
|                                               | FBgn0040271 Sulf1 CG6725 LD03060    |
|                                               | FBgn0024332 Mem3 CG4206 LD07144     |
|                                               | FBgn0036494 Toll-6 CG7250 LD08841   |
|                                               | FBgn0004868 Gdi CG4422 LD46767      |
|                                               | FBgn0002932 neur CG11988 LD45505    |
|                                               | FBgn0035542 CG11347 CG11347 GH28550 |
|                                               | FBgn0040271 Sulf1 CG6725 SD04414    |
|                                               | FBgn0004595 pros CG17228 GH11848    |
|                                               | FBgn0040230 dbo CG6224 RE13447      |

*continued on next page...*

| <i>Table 18 continued from previous page.</i> |                                                                                                                                                                                                                                                                                                                                                                                                                                                                                                                                                                                                                                                                                                                                                                                                             |
|-----------------------------------------------|-------------------------------------------------------------------------------------------------------------------------------------------------------------------------------------------------------------------------------------------------------------------------------------------------------------------------------------------------------------------------------------------------------------------------------------------------------------------------------------------------------------------------------------------------------------------------------------------------------------------------------------------------------------------------------------------------------------------------------------------------------------------------------------------------------------|
| Anatomical Structures                         | Genes                                                                                                                                                                                                                                                                                                                                                                                                                                                                                                                                                                                                                                                                                                                                                                                                       |
|                                               | FBgn0002561 l(1)sc CG3839 RE59335<br>FBgn0037947 CG6930 CG6930 RE72719<br>FBgn0005677 dac CG4952 RE64054<br>FBgn0003300 run CG1849 GH02614<br>FBgn0004584 Rrp1 CG3178 LP05366<br>FBgn0015903 apt CG5393 LD45581<br>FBgn0033992 CG11798 CG11798 LD23883<br>FBgn0000611 exd CG8933 LD03509<br>FBgn0030507 CG11164 CG11164 RE50056<br>FBgn0034878 CG3941 CG3941 LD15650<br>FBgn0000577 en CG9015 LD16125<br>FBgn0003346 Sd CG9999 LD16356<br>FBgn0038118 NULL CG7855 RE03551<br>FBgn0017453 Zn72D CG5215 GH12756<br>FBgn0015773 NetA CG18657 RE11206<br>FBgn0004567 slp2 CG2939 RE11345<br>FBgn0036786 skl CG13701 RE14076<br>FBgn0035186 CG13912 CG13912 RE20371<br>FBgn0010453 Wnt4 CG4698 RE26454<br>FBgn0029512 Aos1 CG12276 LD33652<br>FBgn0034878 CG3941 CG3941 LD15650<br>FBgn0000577 en CG9015 LD16125 |
| posterior endoderm anlage;                    |                                                                                                                                                                                                                                                                                                                                                                                                                                                                                                                                                                                                                                                                                                                                                                                                             |
|                                               | FBgn0002932 neur CG11988 LD45505<br>FBgn0002561 l(1)sc CG3839 RE59335<br>FBgn0037947 CG6930 CG6930 RE72719<br>FBgn0015903 apt CG5393 LD45581<br>FBgn0000611 exd CG8933 LD03509<br>FBgn0003346 Sd CG9999 LD16356<br>FBgn0000659 fkh CG10002 RE03865<br>FBgn0035186 CG13912 CG13912 RE20371                                                                                                                                                                                                                                                                                                                                                                                                                                                                                                                   |
| trunk mesoderm primordium;                    |                                                                                                                                                                                                                                                                                                                                                                                                                                                                                                                                                                                                                                                                                                                                                                                                             |
|                                               | FBgn0035542 CG11347 CG11347 GH28550<br>FBgn0002561 l(1)sc CG3839 RE59335<br>FBgn0033992 CG11798 CG11798 LD23883<br>FBgn0000611 exd CG8933 LD03509<br>FBgn0000577 en CG9015 LD16125<br>FBgn0003346 Sd CG9999 LD16356<br>FBgn0015773 NetA CG18657 RE11206<br>FBgn0000577 en CG9015 LD16125                                                                                                                                                                                                                                                                                                                                                                                                                                                                                                                    |
| protocerebrum primordium;                     |                                                                                                                                                                                                                                                                                                                                                                                                                                                                                                                                                                                                                                                                                                                                                                                                             |
|                                               | FBgn0040271 Sulf1 CG6725 LD03060<br>FBgn0024332 Mcm3 CG4206 LD07144<br>FBgn0013469 NULL CG12296 RE58581<br>FBgn0036494 Toll-6 CG7250 LD08841<br>FBgn0004868 Gdi CG4422 LD46767                                                                                                                                                                                                                                                                                                                                                                                                                                                                                                                                                                                                                              |

*continued on next page...*

| <i>Table 18 continued from previous page.</i> |                                       |
|-----------------------------------------------|---------------------------------------|
| Anatomical Structures                         | Genes                                 |
|                                               | FBgn0002932 neur CG11988 LD45505      |
|                                               | FBgn0035542 CG11347 CG11347 GH28550   |
|                                               | FBgn0040271 Sulf1 CG6725 SD04414      |
|                                               | FBgn0004595 pros CG17228 GH11848      |
|                                               | FBgn0040230 dbo CG6224 RE13447        |
|                                               | FBgn0002561 l(1)sc CG3839 RE59335     |
|                                               | FBgn0037947 CG6930 CG6930 RE72719     |
|                                               | FBgn0037811 CG12592 CG12592 AT09724   |
|                                               | FBgn0005677 dac CG4952 RE64054        |
|                                               | FBgn0003300 run CG1849 GH02614        |
|                                               | FBgn0051670 CG31670 CG31670 GH14092   |
|                                               | FBgn0004584 Rrp1 CG3178 LP05366       |
|                                               | FBgn0015903 apt CG5393 LD45581        |
|                                               | FBgn0033992 CG11798 CG11798 LD23883   |
|                                               | FBgn0039211 CG13620 CG13620 SD03914   |
|                                               | FBgn0000611 exd CG8933 LD03509        |
|                                               | FBgn0030507 CG11164 CG11164 RE50056   |
|                                               | FBgn0034878 CG3941 CG3941 LD15650     |
|                                               | FBgn0000577 en CG9015 LD16125         |
|                                               | FBgn0003346 Sd CG9999 LD16356         |
|                                               | FBgn0038118 NULL CG7855 RE03551       |
|                                               | FBgn0000659 fkh CG10002 RE03865       |
|                                               | FBgn0017453 Zn72D CG5215 GH12756      |
|                                               | FBgn0015773 NetA CG18657 RE11206      |
|                                               | FBgn0004567 slp2 CG2939 RE11345       |
|                                               | FBgn0036786 skl CG13701 RE14076       |
|                                               | FBgn0038150 yellow-e3 CG17045 RE14803 |
|                                               | FBgn0035186 CG13912 CG13912 RE20371   |
|                                               | FBgn0010453 Wnt4 CG4698 RE26454       |
|                                               | FBgn0013725 phyl CG10108 RH04401      |
|                                               | FBgn0029512 Aos1 CG12276 LD33652      |
|                                               | FBgn0031971 CG7224 CG7224 GH18422     |
|                                               | FBgn0051670 CG31670 CG31670 GH14092   |
|                                               | FBgn0034878 CG3941 CG3941 LD15650     |
|                                               | FBgn0000577 en CG9015 LD16125         |
| embryonic/larval garland cell;                |                                       |
| embryonic dorsal pouch primordium;            | FBgn0004595 pros CG17228 GH11848      |
| embryonic/larval tracheal system;             | FBgn0015903 apt CG5393 LD45581        |
| ventral epidermis primordium;                 | FBgn0039211 CG13620 CG13620 SD03914   |
|                                               | FBgn0036494 Toll-6 CG7250 LD08841     |
|                                               | FBgn0035542 CG11347 CG11347 GH28550   |
|                                               | FBgn0040230 dbo CG6224 RE13447        |
|                                               | FBgn0037947 CG6930 CG6930 RE72719     |

*continued on next page...*

*Table 18 continued from previous page.*

| Anatomical Structures                  | Genes                                 |
|----------------------------------------|---------------------------------------|
| neuroblasts of ventral nervous system; | FBgn0037811 CG12592 CG12592 AT09724   |
|                                        | FBgn0003300 run CG1849 GH02614        |
|                                        | FBgn0015903 apt CG5393 LD45581        |
|                                        | FBgn0033992 CG11798 CG11798 LD23883   |
|                                        | FBgn0000611 exd CG8933 LD03509        |
|                                        | FBgn0000577 en CG9015 LD16125         |
|                                        | FBgn0004567 slp2 CG2939 RE11345       |
|                                        | FBgn0038150 yellow-e3 CG17045 RE14803 |
|                                        | FBgn0035186 CG13912 CG13912 RE20371   |
|                                        | FBgn0010453 Wnt4 CG4698 RE26454       |
|                                        | FBgn0000577 en CG9015 LD16125         |
|                                        | FBgn0024332 Mcm3 CG4206 LD07144       |
|                                        | FBgn0036494 Toll-6 CG7250 LD08841     |
|                                        | FBgn0002932 neur CG11988 LD45505      |
|                                        | FBgn0040271 Sulf1 CG6725 SD04414      |
|                                        | FBgn0004595 pros CG17228 GH11848      |
|                                        | FBgn0040230 dbo CG6224 RE13447        |
|                                        | FBgn0002561 l(1)sc CG3839 RE59335     |
|                                        | FBgn0003300 run CG1849 GH02614        |
| FBgn0033992 CG11798 CG11798 LD23883    |                                       |
| FBgn0030507 CG11164 CG11164 RE50056    |                                       |
| FBgn0034878 CG3941 CG3941 LD15650      |                                       |
| FBgn0003346 Sd CG9999 LD16356          |                                       |
| FBgn0038118 NULL CG7855 RE03551        |                                       |
| FBgn0035186 CG13912 CG13912 RE20371    |                                       |
| FBgn0034878 CG3941 CG3941 LD15650      |                                       |
| embryonic antennal sense organ;        | FBgn0004868 Gdi CG4422 LD46767        |
| hindgut anlage;                        | FBgn0040230 dbo CG6224 RE13447        |
|                                        | FBgn0003300 run CG1849 GH02614        |
|                                        | FBgn0015903 apt CG5393 LD45581        |
|                                        | FBgn0000611 exd CG8933 LD03509        |
|                                        | FBgn0000577 en CG9015 LD16125         |
|                                        | FBgn0003346 Sd CG9999 LD16356         |
|                                        | FBgn0000659 fkh CG10002 RE03865       |
|                                        | FBgn0031971 CG7224 CG7224 GH18422     |
|                                        | FBgn0000577 en CG9015 LD16125         |
